# Supplementary material for: Catalyst-free Biginelli-type synthesis of new functionalized 4,7-dihydropyrazolo[1,5-a]pyrimidines
Source: Royal Society of Chemistry journal article supplement (doi:10.1039/c6nj00336b), 2016-01-01
Supplement: c6nj00336b1.pdf [file c6nj00336b1.pdf]

## Supplementary information

### Catalyst-free Biginelli-type synthesis of new functionalized 4,7-dihydropyrazolo[1,5-*a*]pyrimidines

Maksim A. Kolosov,<sup>a</sup> Dmitriy A. Beloborodov,<sup>a</sup> Valeriy D. Orlov<sup>a</sup> and Victor V. Dotsenko<sup>\*b,c</sup>

<sup>a</sup>Department of Organic Chemistry, V.N. Karazin Kharkiv National University, Svobody sq., 4, 61022 Kharkiv, Ukraine

<sup>b</sup>Department of Organic Chemistry & Technologies, Kuban State University, 149 Stavropolskaya str., 350040 Krasnodar, Russian Federation

<sup>c</sup>Department of Chemistry, North Caucasus Federal University, 1a Pushkin St., 355009 Stavropol, Russian Federation

2. <sup>1</sup>H NMR spectra of the synthesized compounds

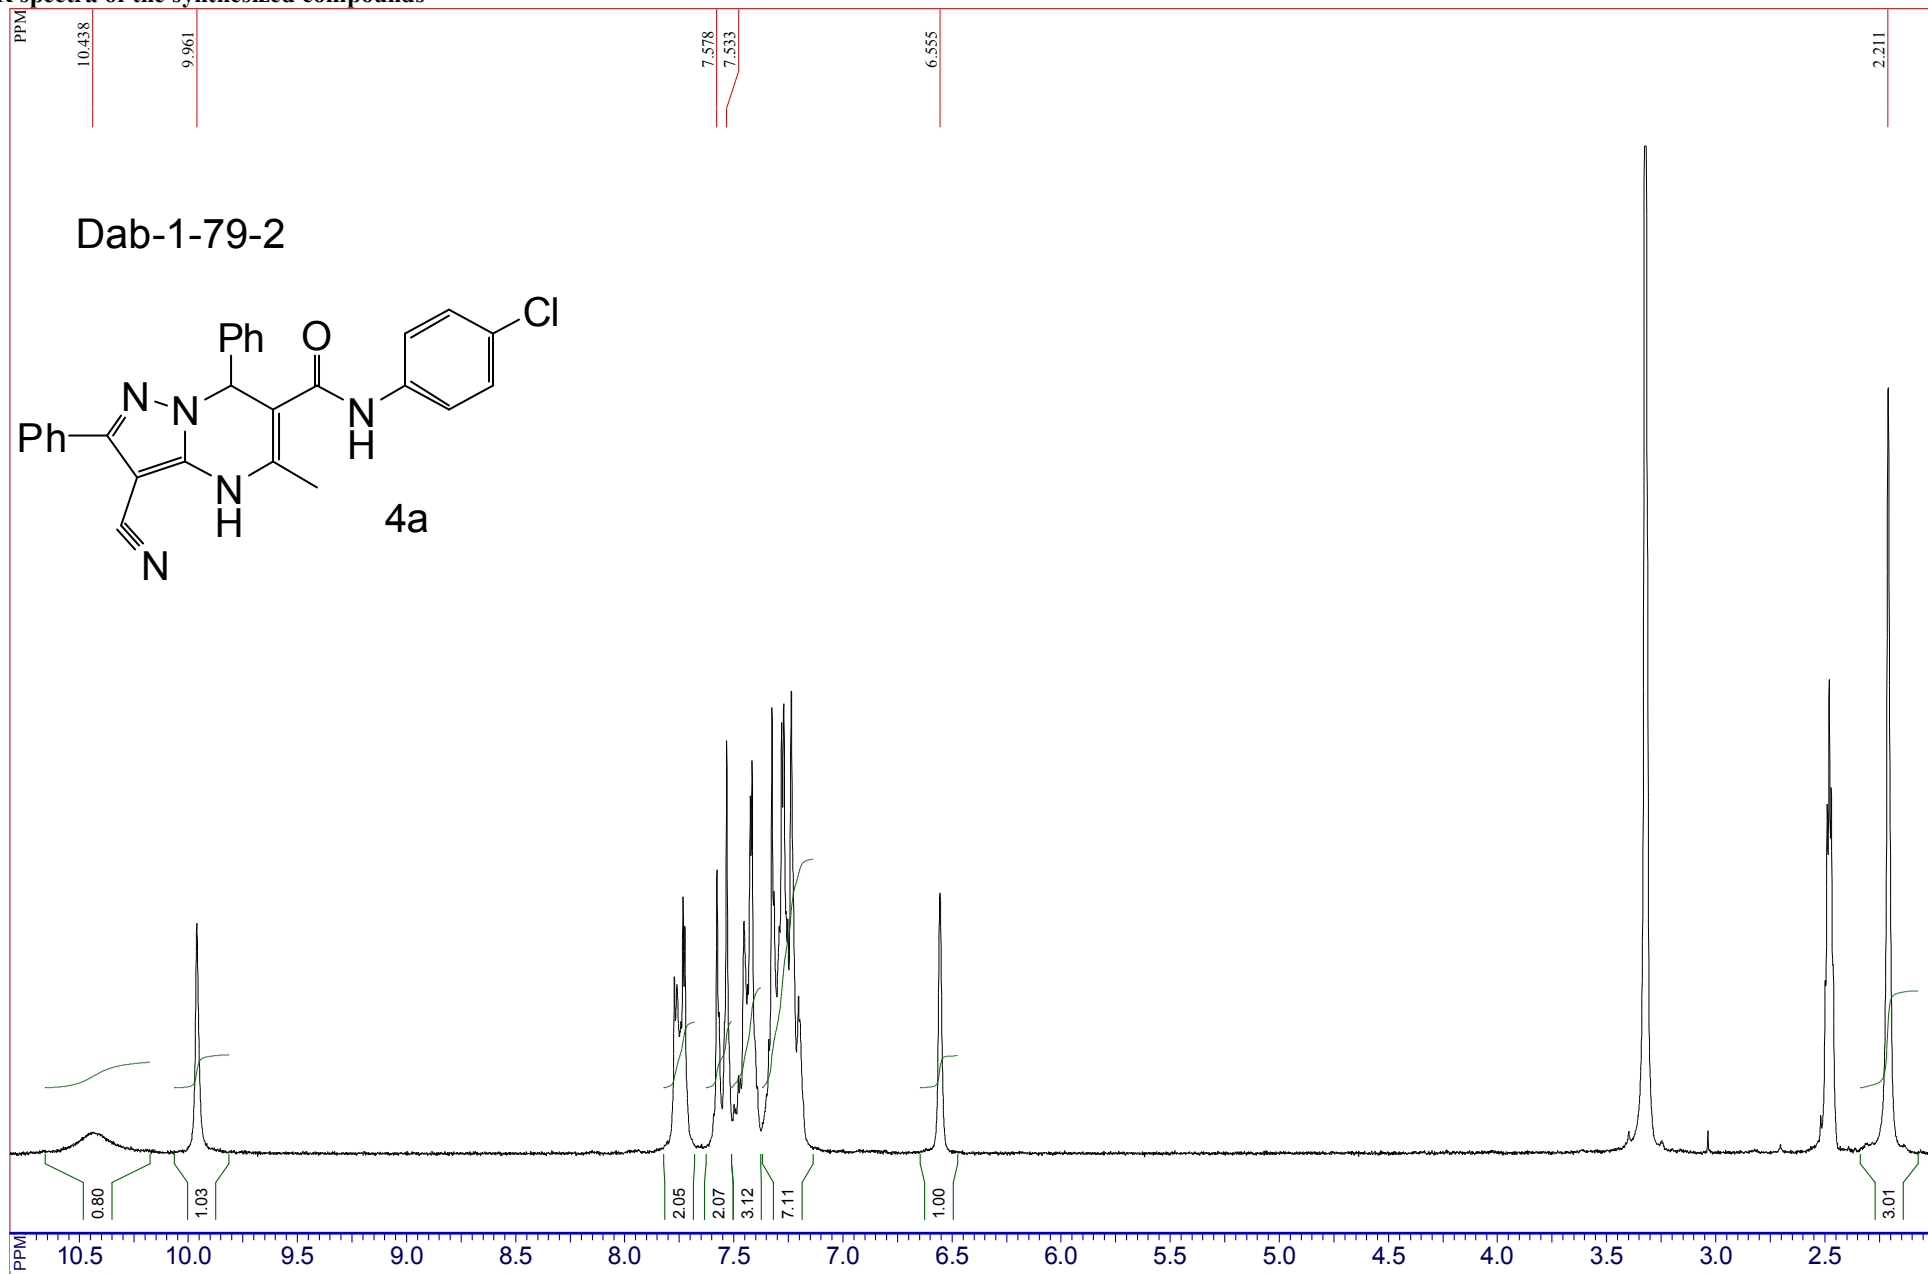

|                       |               |                  |           |                            |           |
|-----------------------|---------------|------------------|-----------|----------------------------|-----------|
| File name: Dab-1-79-2 | Operator:     | SF: 199.9704 MHz | NSC: 0    | PW: 4.00 usec, RG: 28      | SI: 32768 |
| Date: 09-Jun-2008     | Solvent: DMSO | SW: 5000 Hz      | TE: 302 K | AQ: 1.99 sec, RD: 0.00 sec |           |

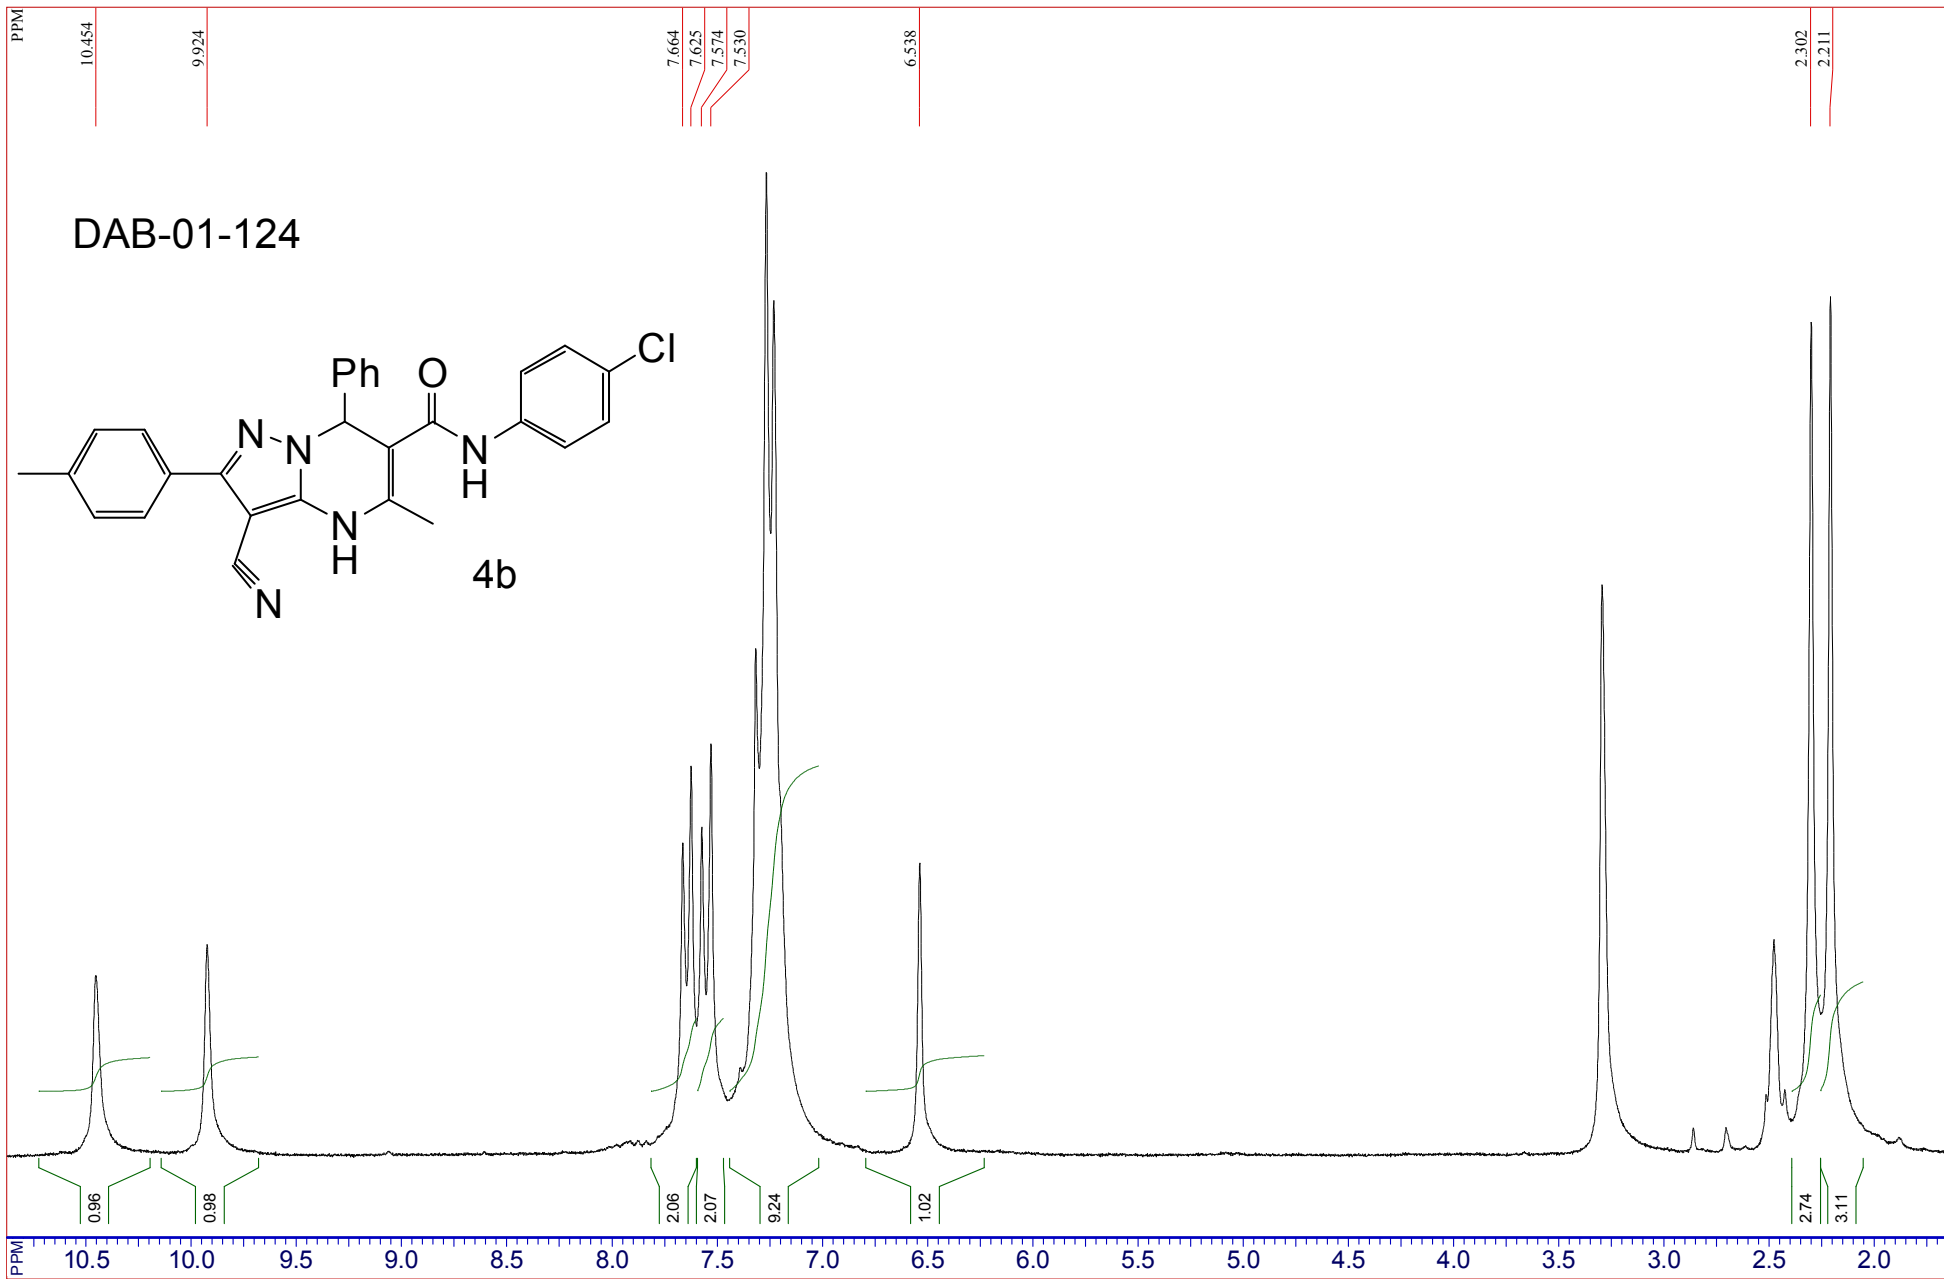

|                       |               |                  |           |                            |           |
|-----------------------|---------------|------------------|-----------|----------------------------|-----------|
| File name: DAB-01-124 | Operator:     | SF: 199.9704 MHz | NSC: 0    | PW: 7.00 usec, RG: 34      | SI: 32768 |
| Date: 08-Dec-2008     | Solvent: DMSO | SW: 5000 Hz      | TE: 292 K | AQ: 2.00 sec, RD: 0.00 sec |           |

Dab-1-86-2

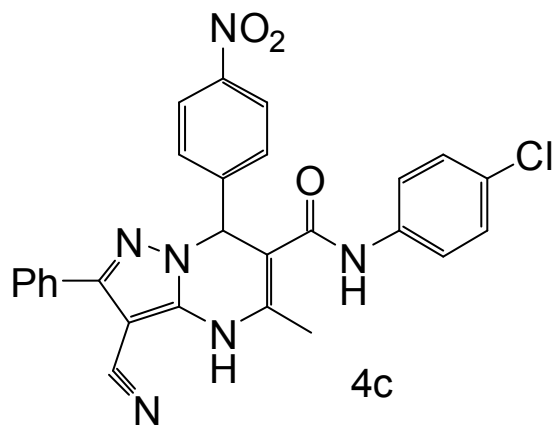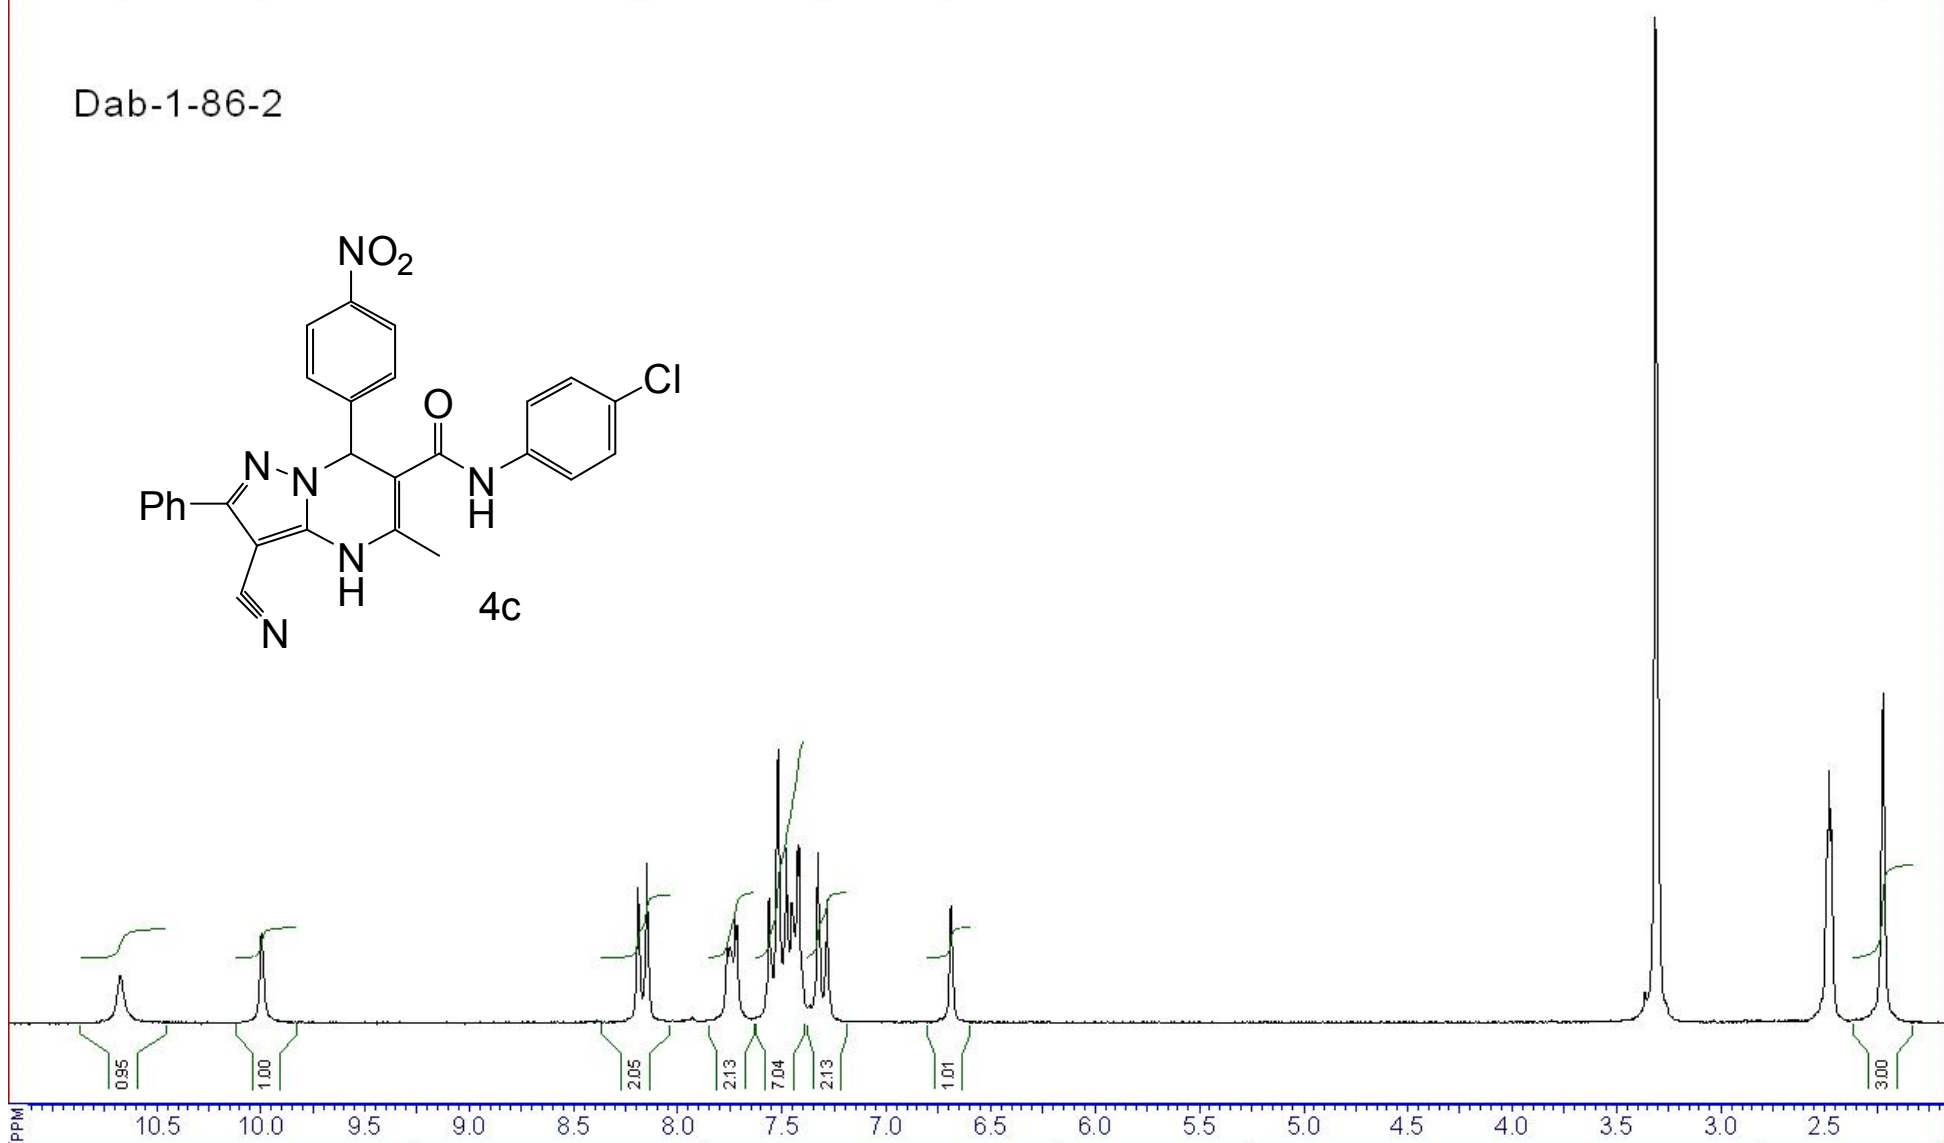

|                       |               |                  |           |                            |           |
|-----------------------|---------------|------------------|-----------|----------------------------|-----------|
| File name: Dab-1-86-2 | Operator:     | SF: 199.9704 MHz | NSC: 0    | PW: 4.00 usec, RG: 30      | SI: 32768 |
| Date: 21-May-2008     | Solvent: DMSO | SW: 5000 Hz      | TE: 302 K | AQ: 1.99 sec, RD: 0.00 sec |           |

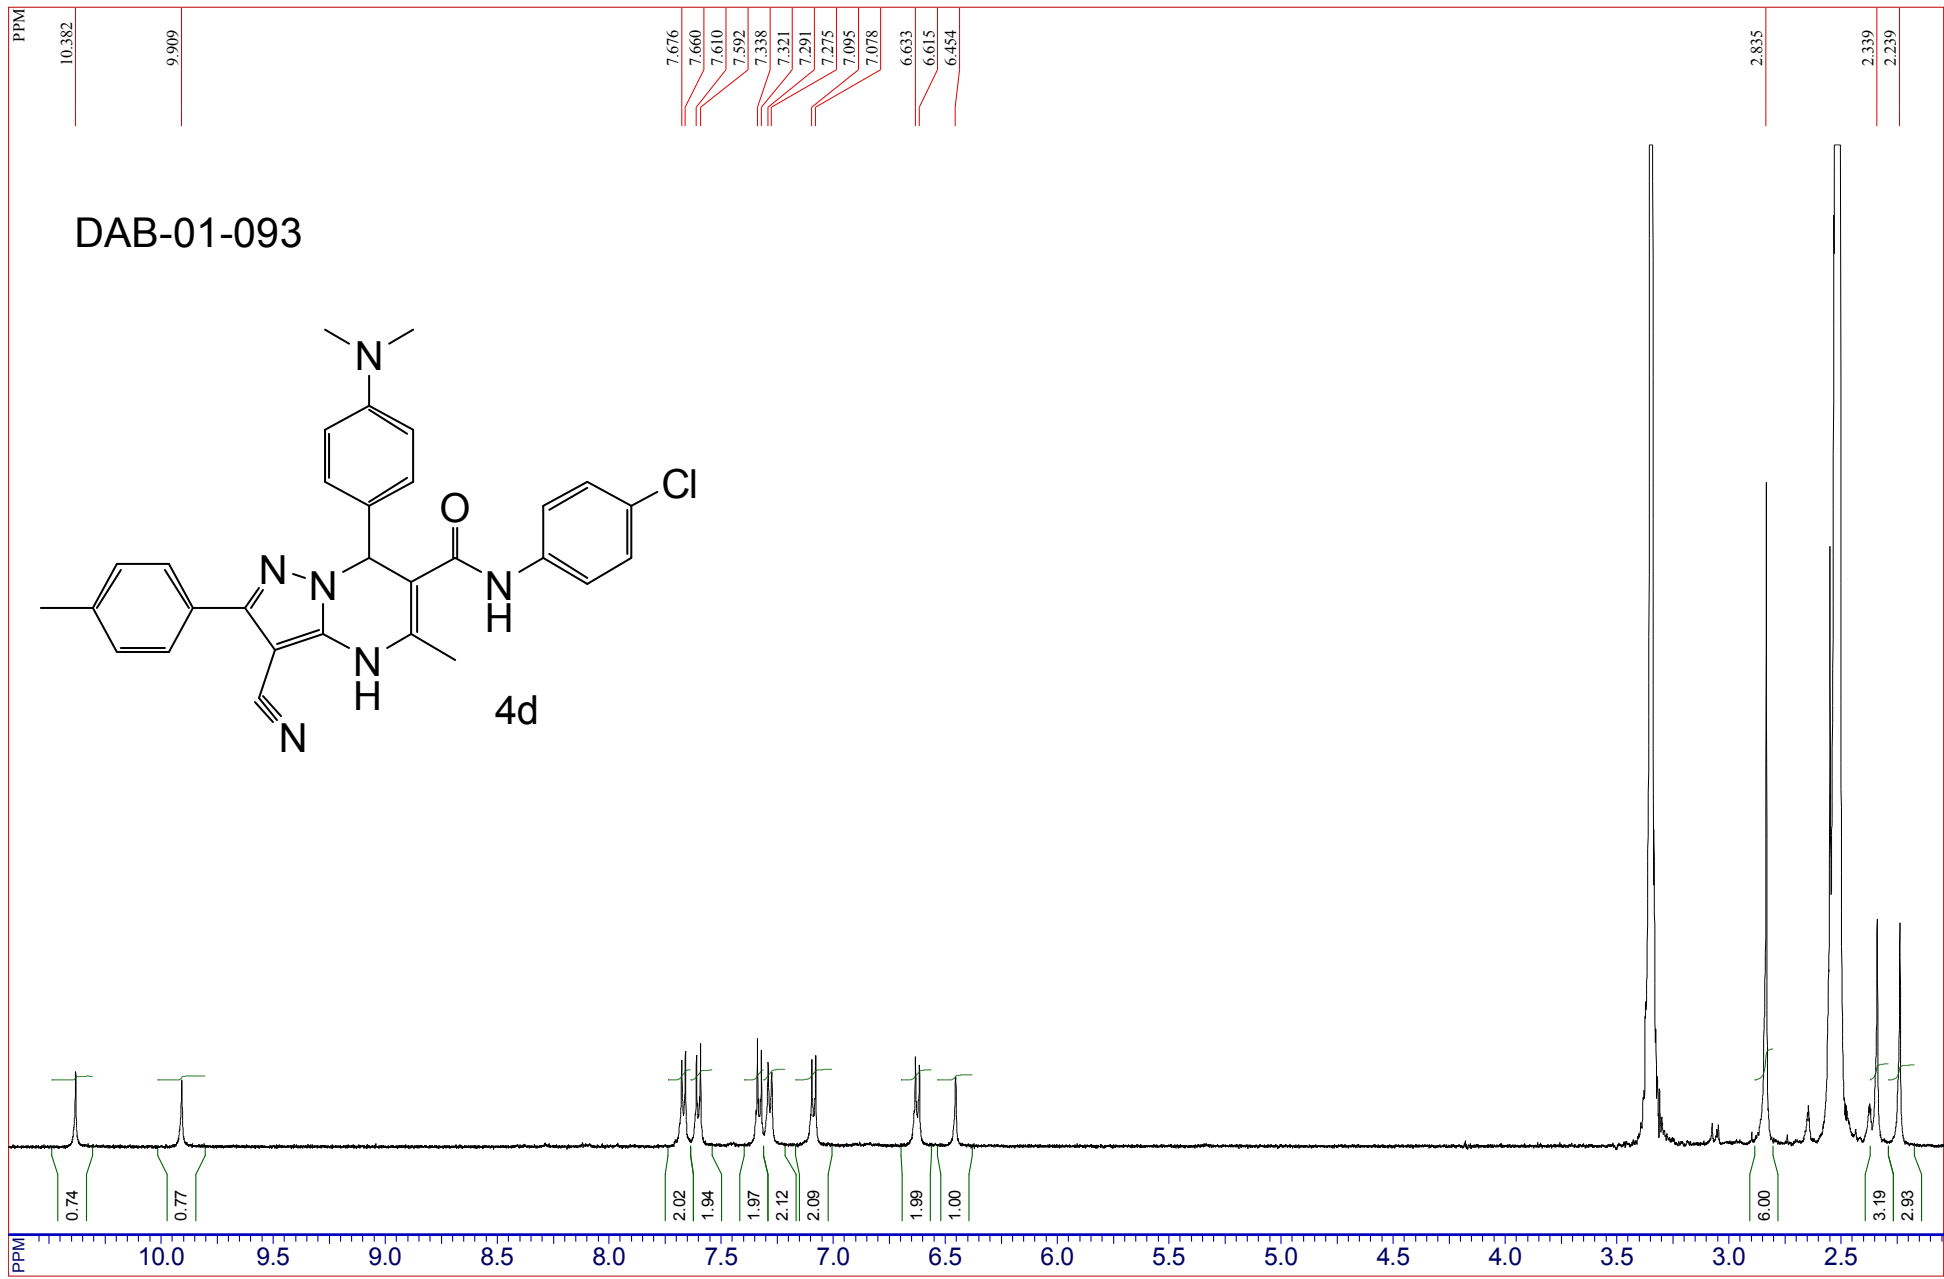

|                       |                |                  |         |                            |           |
|-----------------------|----------------|------------------|---------|----------------------------|-----------|
| File name: DAB-01-093 | Operator: root | SF: 500.0680 MHz | NSC: 1  | PW: 0.00 usec, RG: 32      | SI: 32768 |
| Date: 12-Oct-2011     | Solvent: DMSO  | SW: 8013 Hz      | TE: 0 K | AQ: 2.04 sec, RD: 0.00 sec |           |

PPM

10.952

7.642  
7.602

6.248

4.025  
3.989  
3.954  
3.9182.450  
2.2981.096  
1.060  
1.025

DAB-1-137

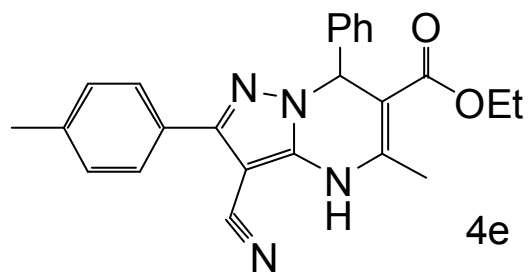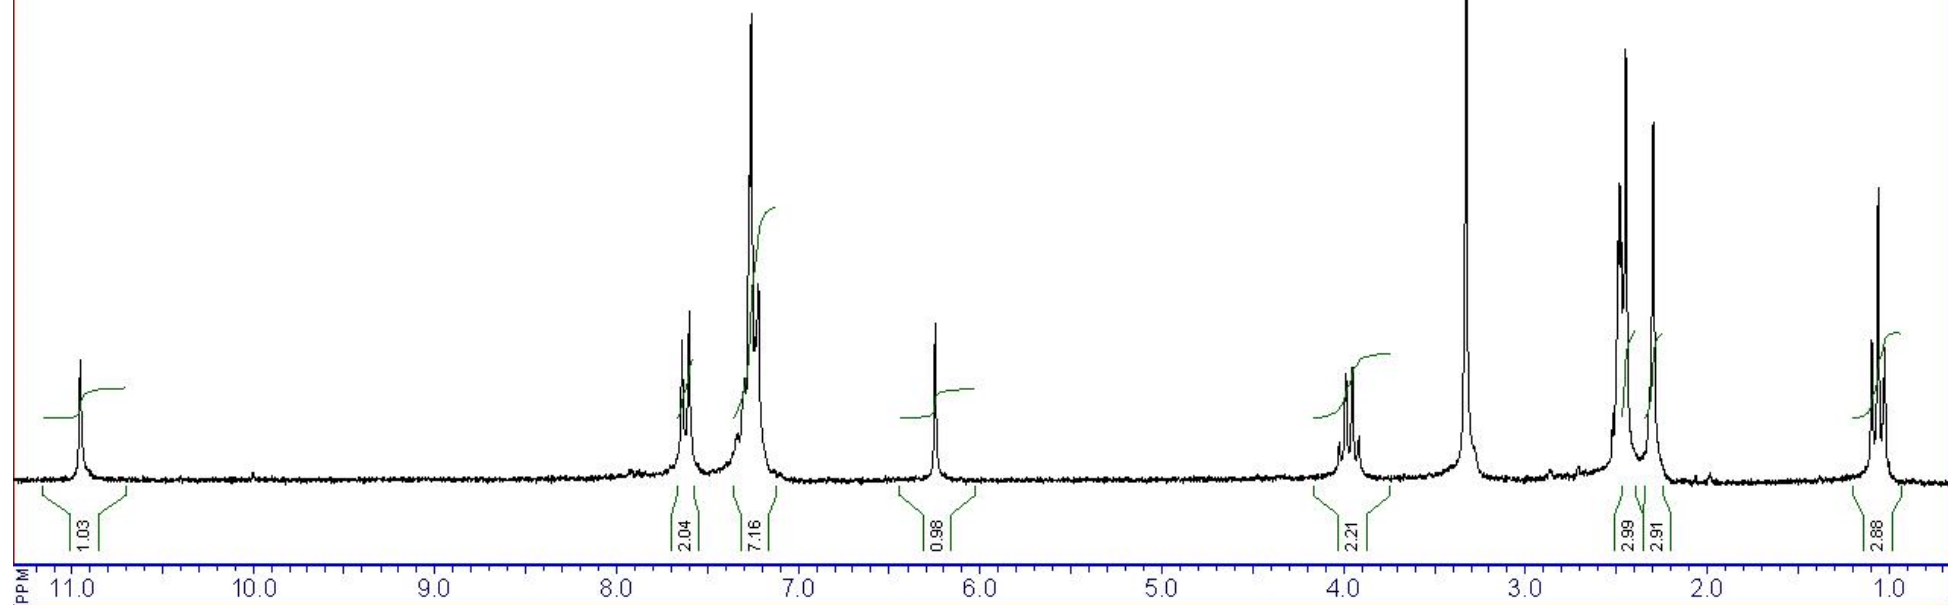

|                      |               |                  |           |                            |           |
|----------------------|---------------|------------------|-----------|----------------------------|-----------|
| File name: DAB-1-137 | Operator:     | SF: 199.9704 MHz | NSC: 0    | PW: 7.00 usec, RG: 32      | SI: 32768 |
| Date: 26-Jan-2009    | Solvent: DMSO | SW: 5000 Hz      | TE: 302 K | AQ: 1.92 sec, RD: 0.00 sec |           |

PPM

7.652  
7.611

6.432

2.472  
2.303  
2.167

DAB-1-188.fid

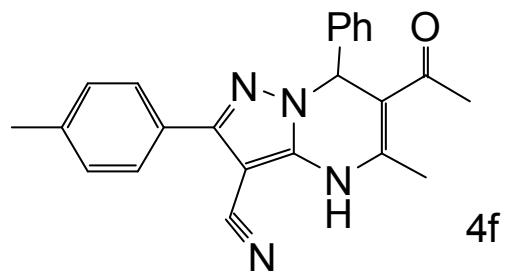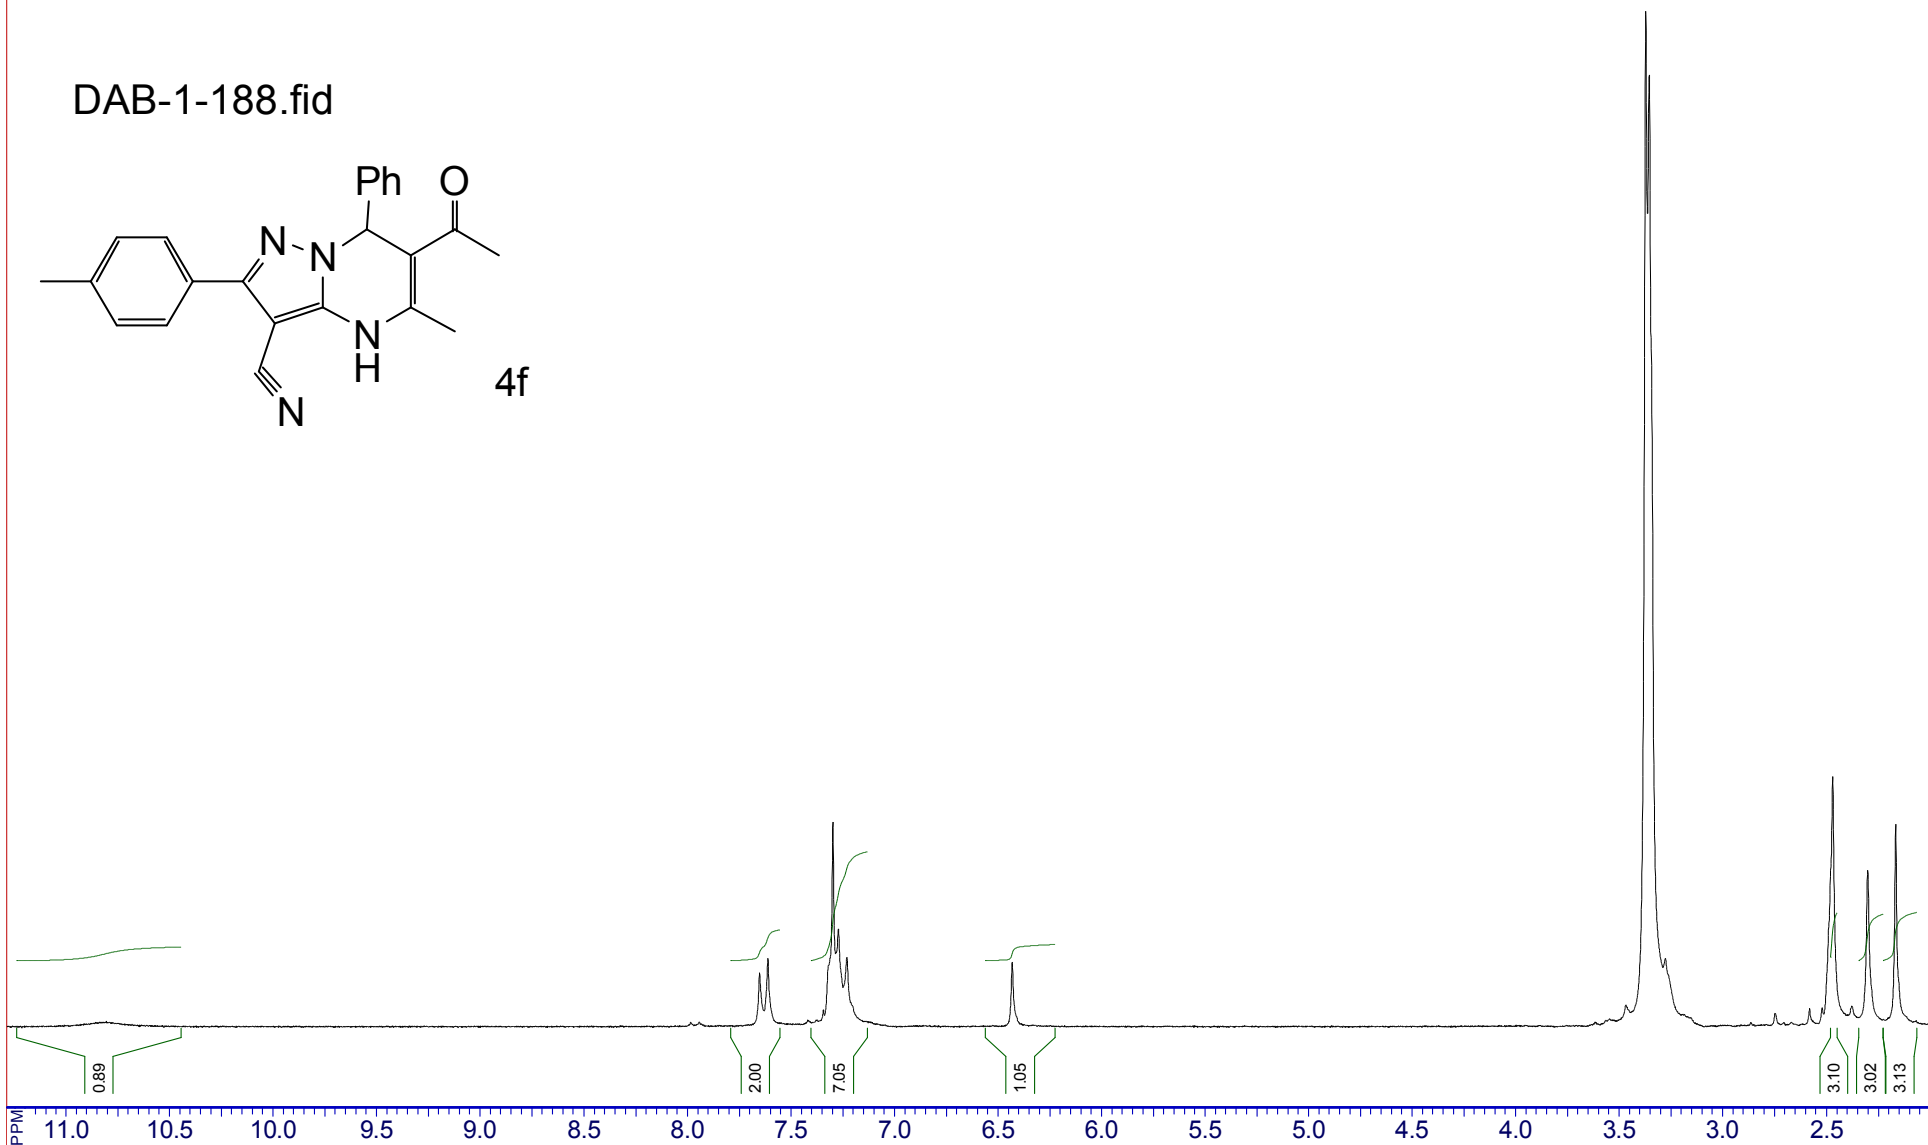

|                          |               |                  |           |                            |           |
|--------------------------|---------------|------------------|-----------|----------------------------|-----------|
| File name: DAB-1-188.fid | Operator:     | SF: 199.9704 MHz | NSC: 0    | PW: 7.00 usec, RG: 39      | SI: 32768 |
| Date: 29-Jul-2009        | Solvent: DMSO | SW: 5999 Hz      | TE: 293 K | AQ: 1.99 sec, RD: 0.00 sec |           |

PPM

13.352

5.881

2.331

DAB-1-81

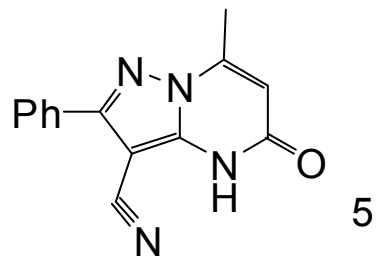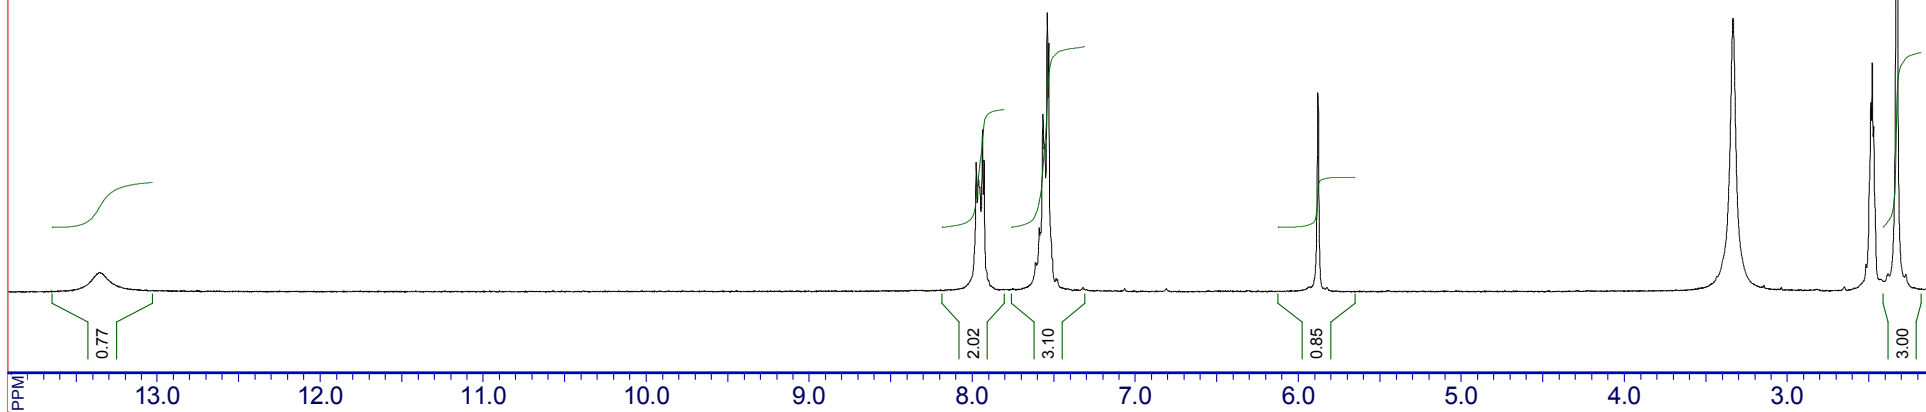

PPM

File name: DAB-1-81

Operator:

SF: 199.9704 MHz

NSC: 0

PW: 4.00 usec, RG: 36

SI: 32768

Date: 23-Apr-2008

Solvent: DMSO

SW: 5000 Hz

TE: 302 K

AQ: 1.99 sec, RD: 0.00 sec



PPM

7.930  
7.8897.347  
7.307

7.088

2.716

2.555

2.367

DAB-01-149

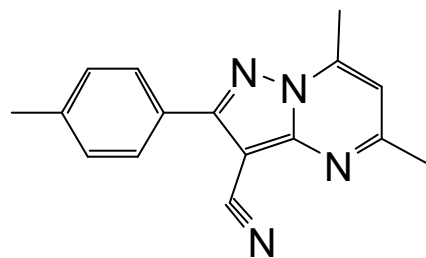

6

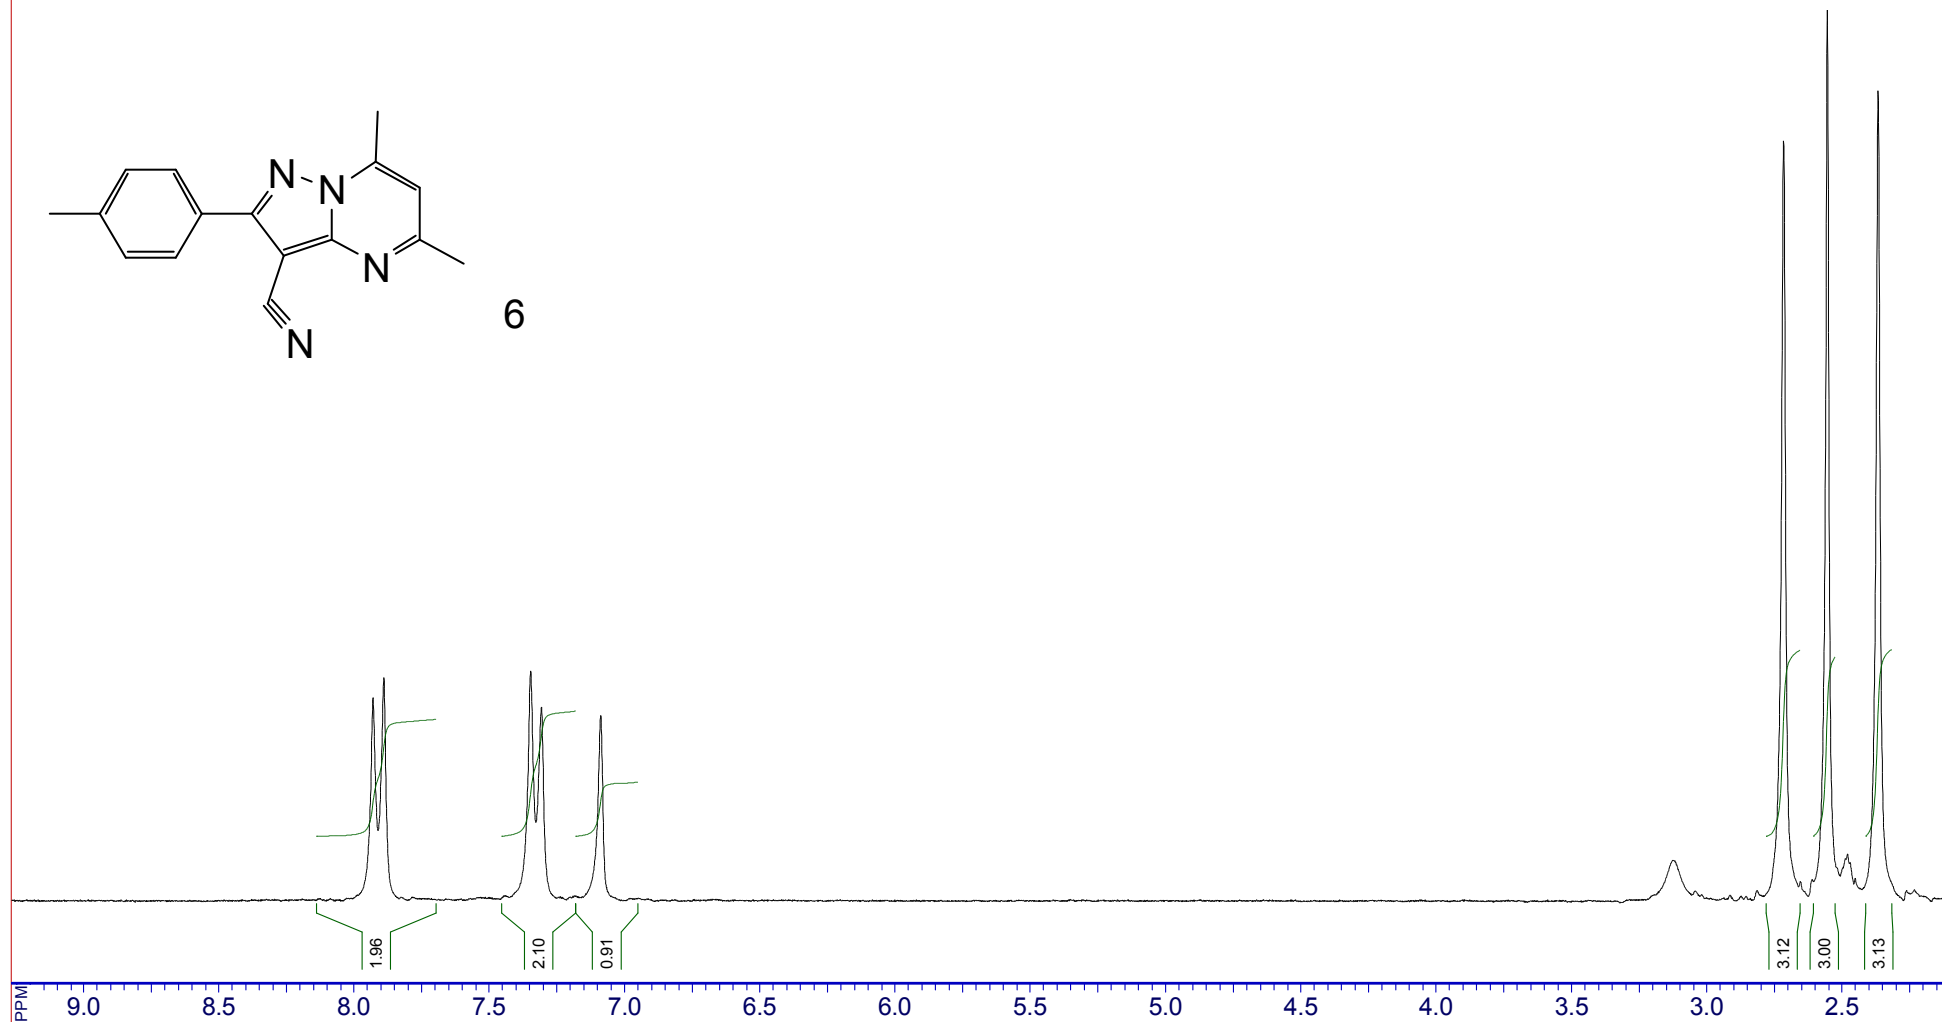

PPM

9.0

8.5

8.0

7.5

7.0

6.5

6.0

5.5

5.0

4.5

4.0

3.5

3.0

2.5

File name: DAB-01-149

Operator:

SF: 199.9706 MHz

NSC: 0

PW: 7.00 usec, RG: 32

SI: 32768

Date: 23-Feb-2009

Solvent: DMSO

SW: 5000 Hz

TE: 302 K

AQ: 2.56 sec, RD: 0.00 sec

PPM

11.322

7.653

7.612

6.208

2.299

DAB-1-136

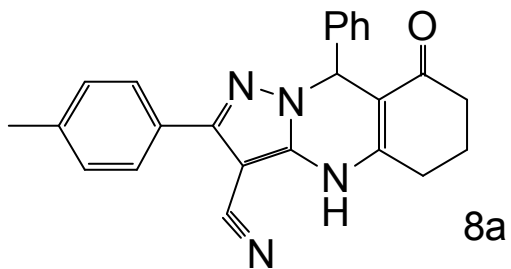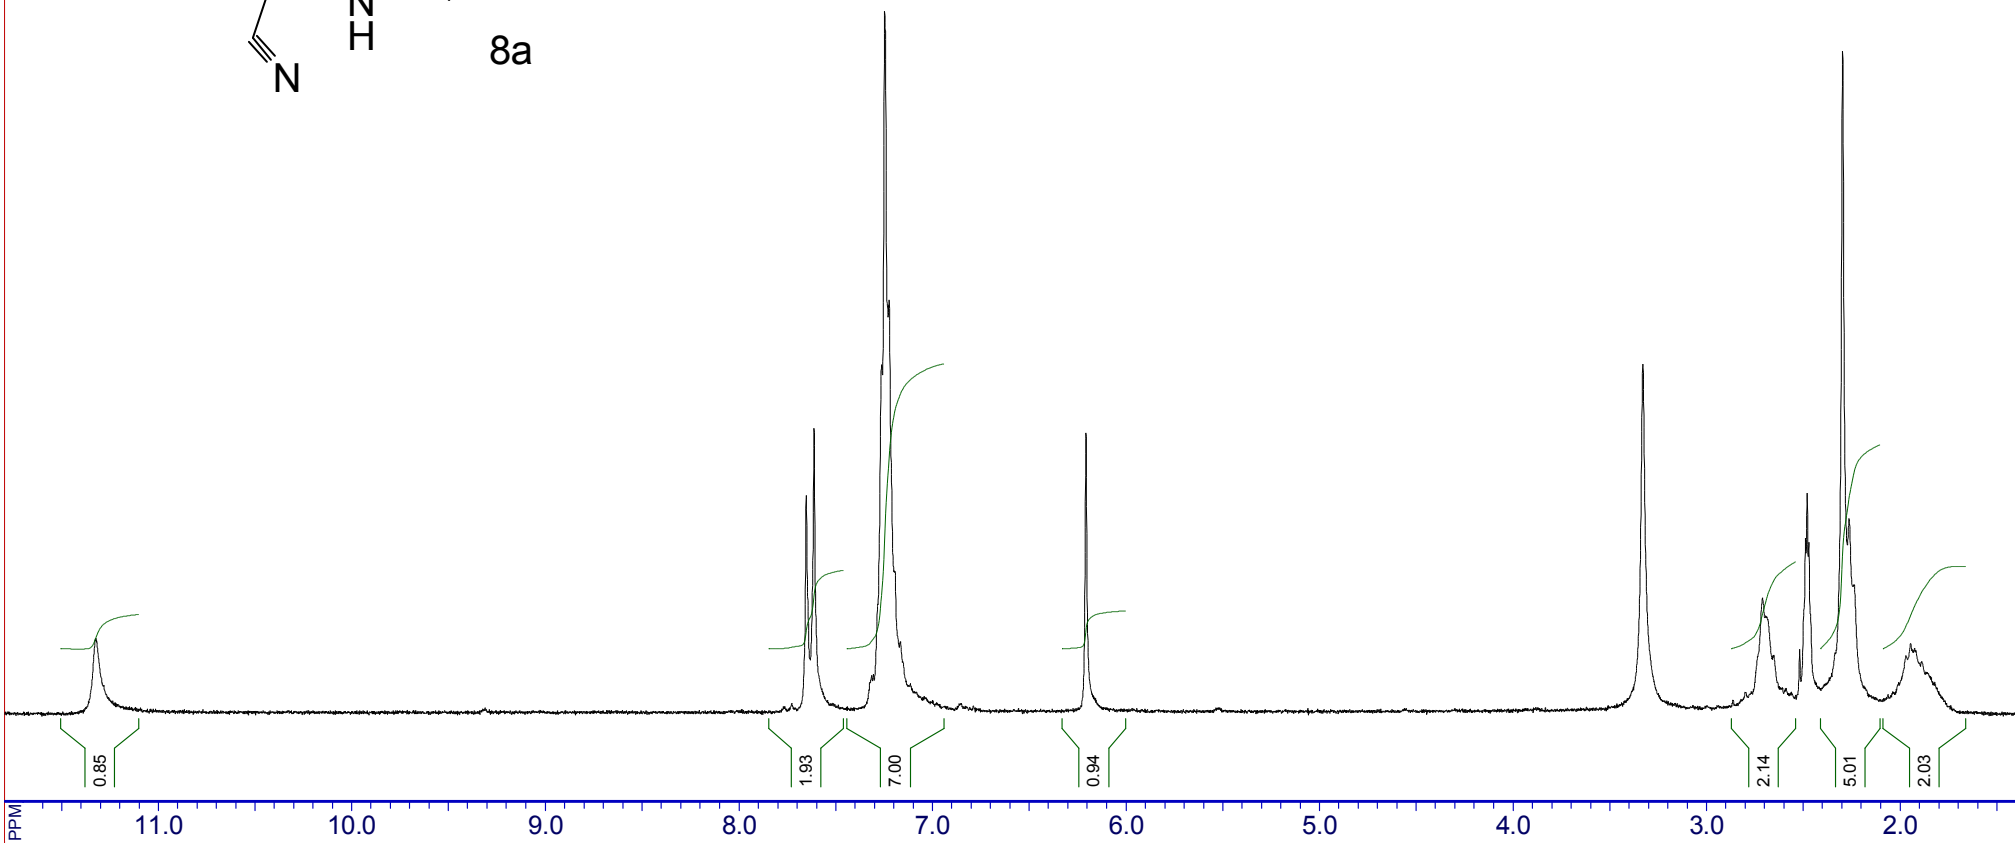

PPM

File name: DAB-1-136

Operator:

SF: 199.9704 MHz

NSC: 0

PW: 7.00 usec, RG: 32

SI: 32768

Date: 26-Jan-2009

Solvent: DMSO

SW: 5000 Hz

TE: 302 K

AQ: 1.92 sec, RD: 0.00 sec

PPM

11.183

7.662

7.628

7.260

7.227

7.050

7.015

6.593

6.557

6.094

2.795

2.298

Dab-1-144

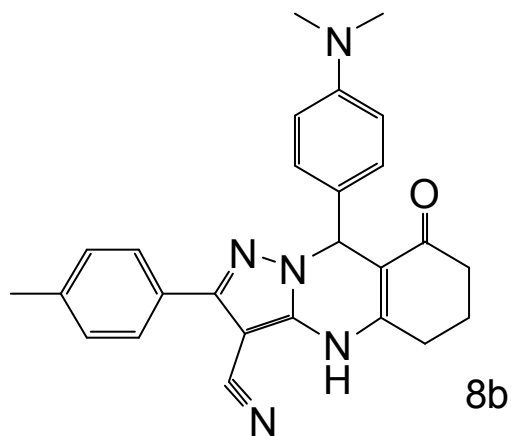

8b

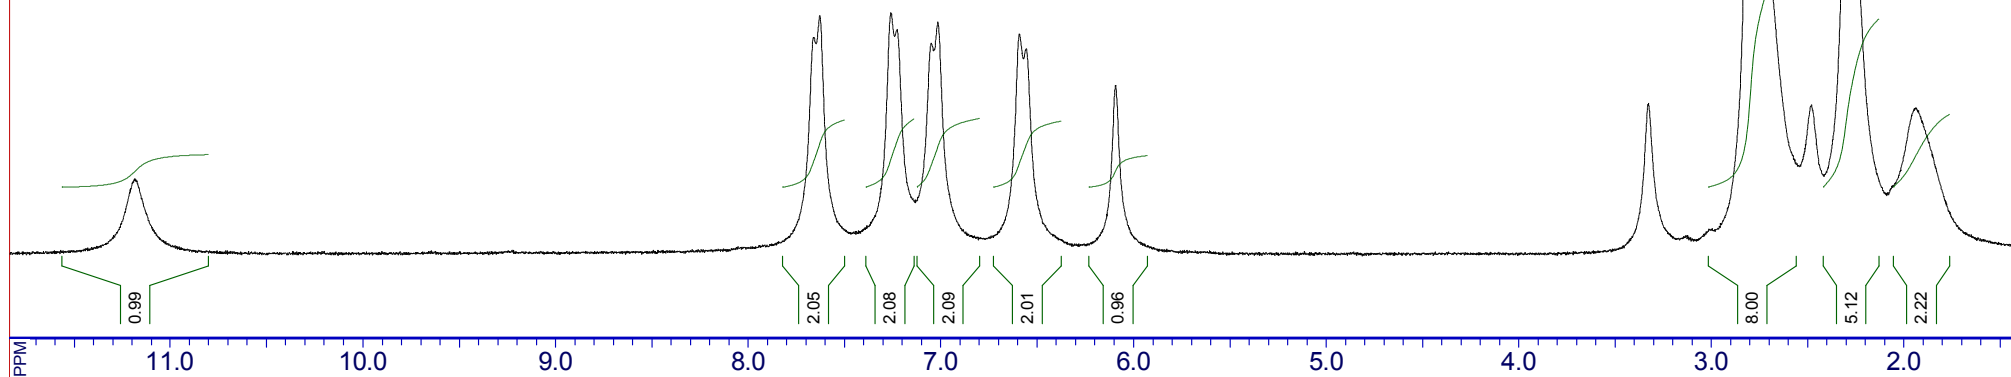

File name: Dab-1-144

Operator:

SF: 199.9704 MHz

NSC: 0

PW: 7.00 usec, RG: 32

SI: 32768

Date: 04-Feb-2009

Solvent: DMSO

SW: 5999 Hz

TE: 302 K

AQ: 1.92 sec, RD: 0.00 sec

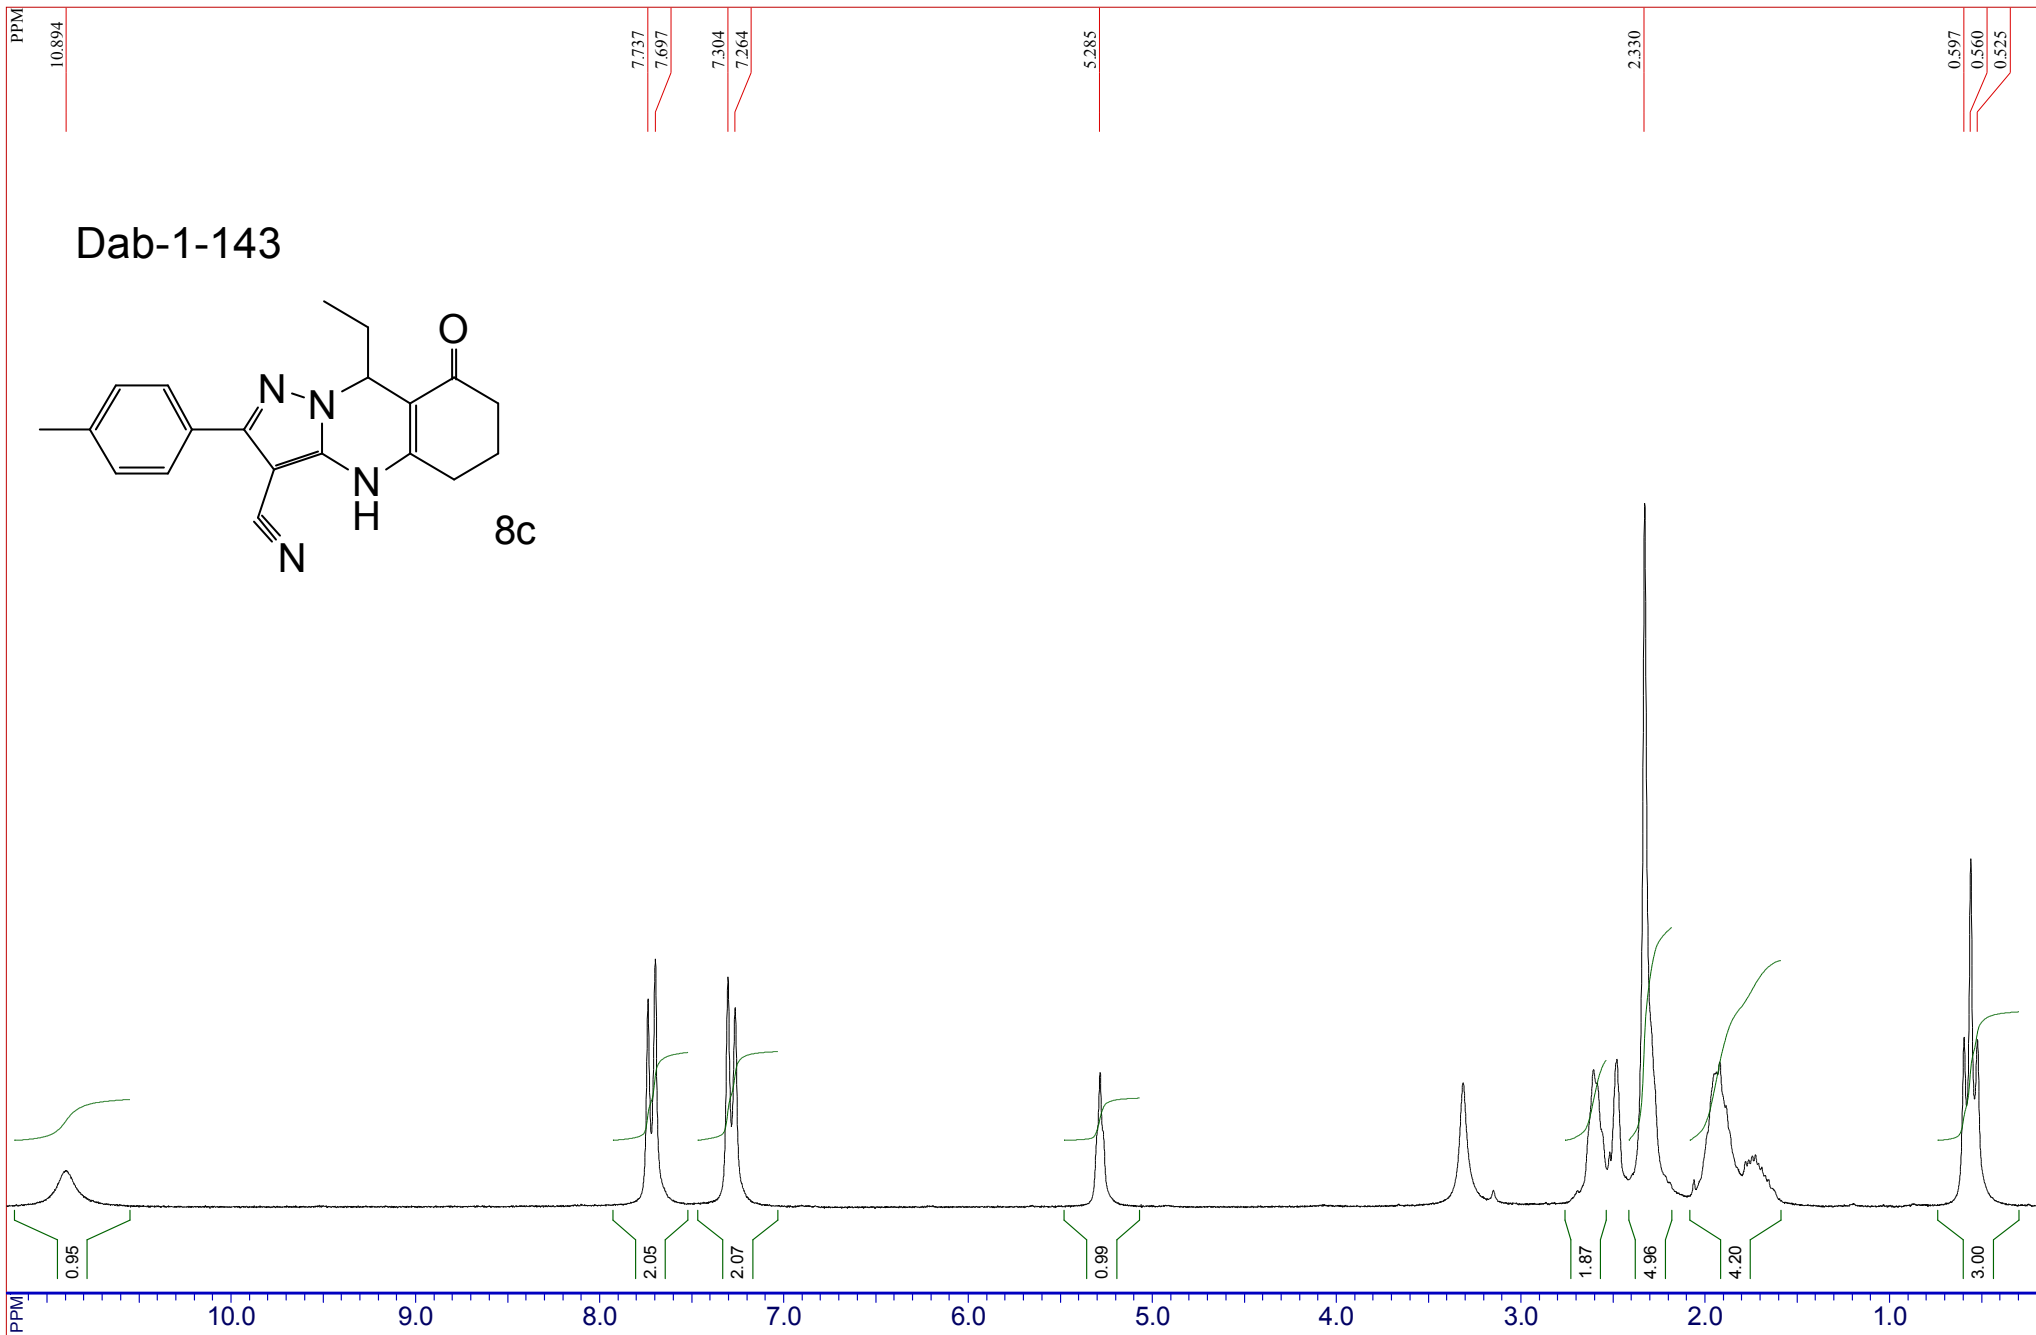

|                      |               |                  |           |                            |           |
|----------------------|---------------|------------------|-----------|----------------------------|-----------|
| File name: Dab-1-143 | Operator:     | SF: 199.9704 MHz | NSC: 0    | PW: 7.00 usec, RG: 32      | SI: 32768 |
| Date: 04-Feb-2009    | Solvent: DMSO | SW: 5999 Hz      | TE: 302 K | AQ: 1.92 sec, RD: 0.00 sec |           |

PPM

10.767

7.140  
7.098  
7.076  
7.035

6.173

2.198

DAB-01-088

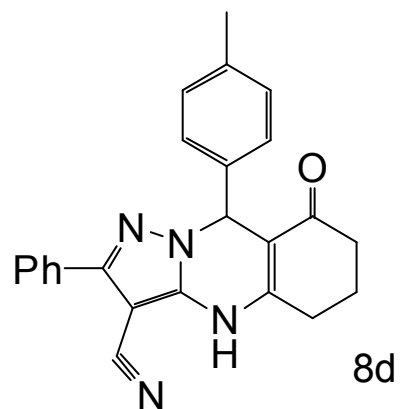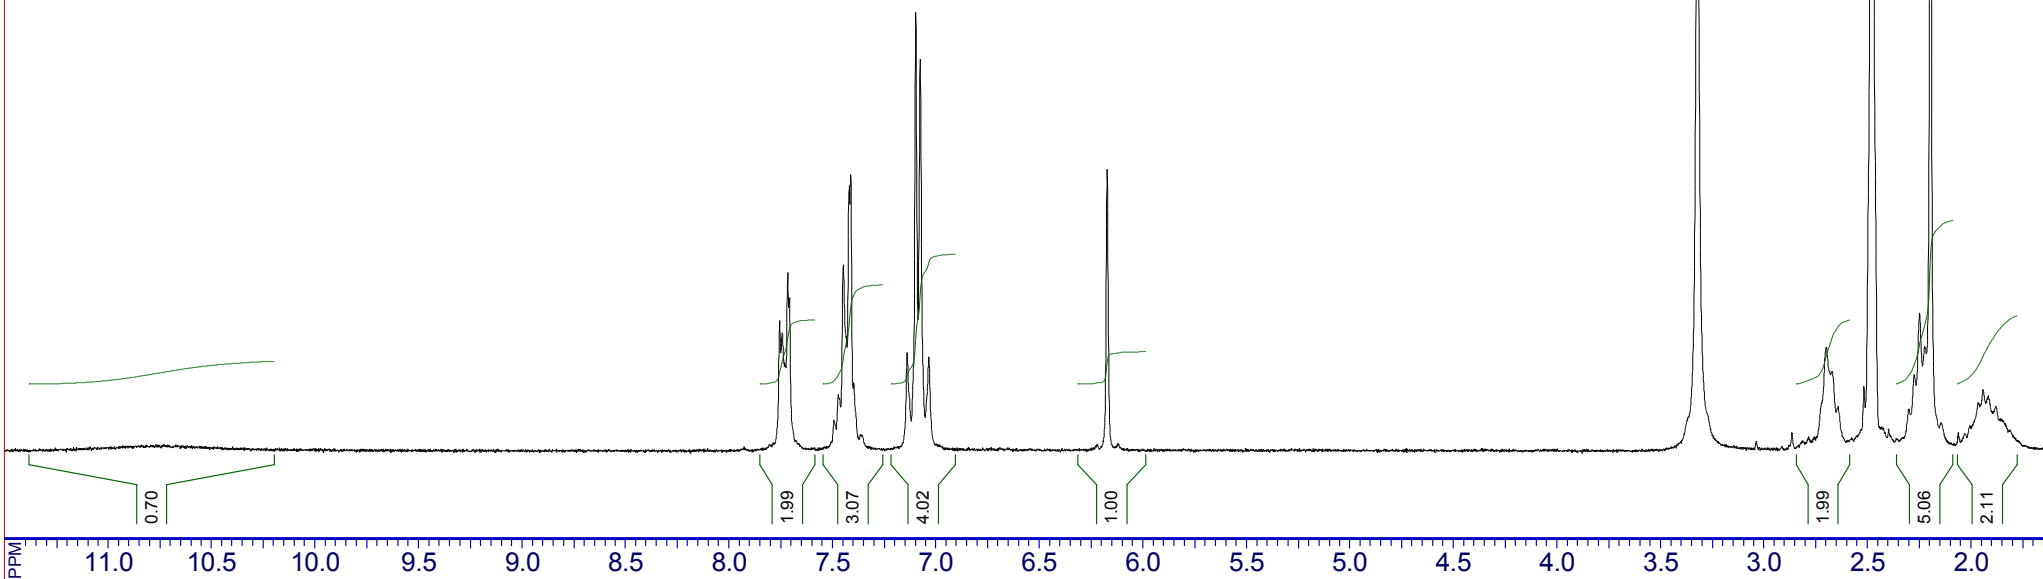

PPM

11.0 10.5 10.0 9.5 9.0 8.5 8.0

7.5 7.0 6.5 6.0 5.5 5.0 4.5 4.0 3.5 3.0

2.5 2.0

File name: DAB-01-088

Operator:

SF: 199.9704 MHz

NSC: 0

PW: 4.00 usec, RG: 39

SI: 32768

Date: 15-May-2008

Solvent: DMSO

SW: 5000 Hz

TE: 302 K

AQ: 1.99 sec, RD: 0.00 sec

PPM

7.629  
7.609

6.245

2.287

1.375  
1.357  
1.340

DAB-2-104-P1.fid

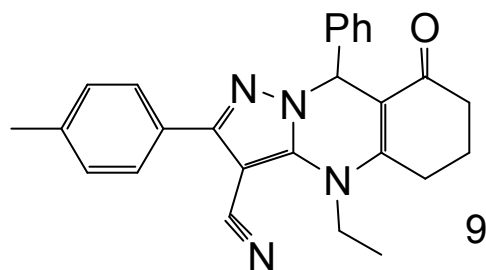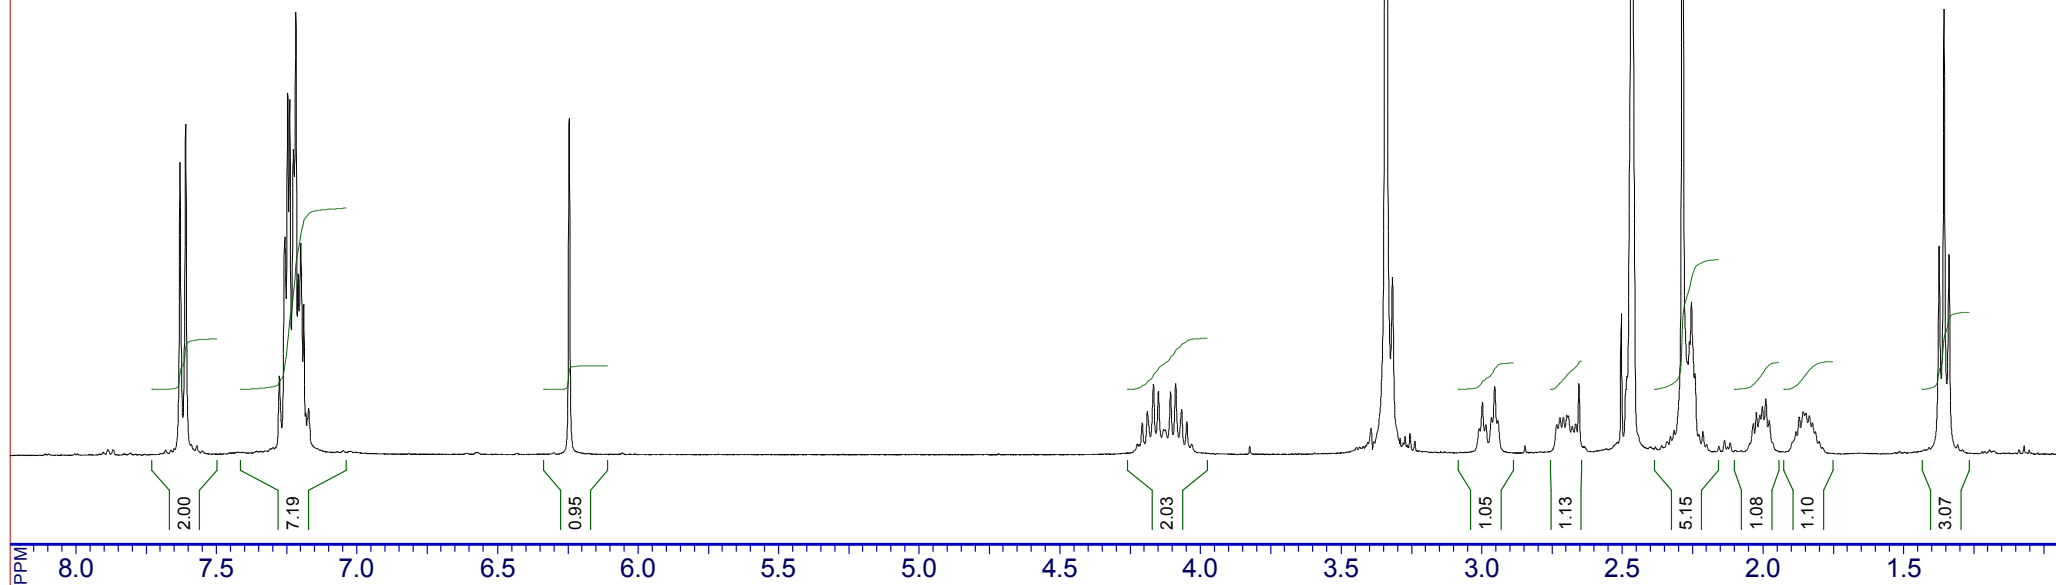

File name: DAB-2-104-P1.fid

Operator:

SF: 399.6338 MHz

NSC: 0

PW: 6.95 usec, RG: 30

SI: 32768

Date: 13-Sep-2015

Solvent: dms0

SW: 6410 Hz

TE: 298 K

AQ: 2.56 sec, RD: 0.00 sec

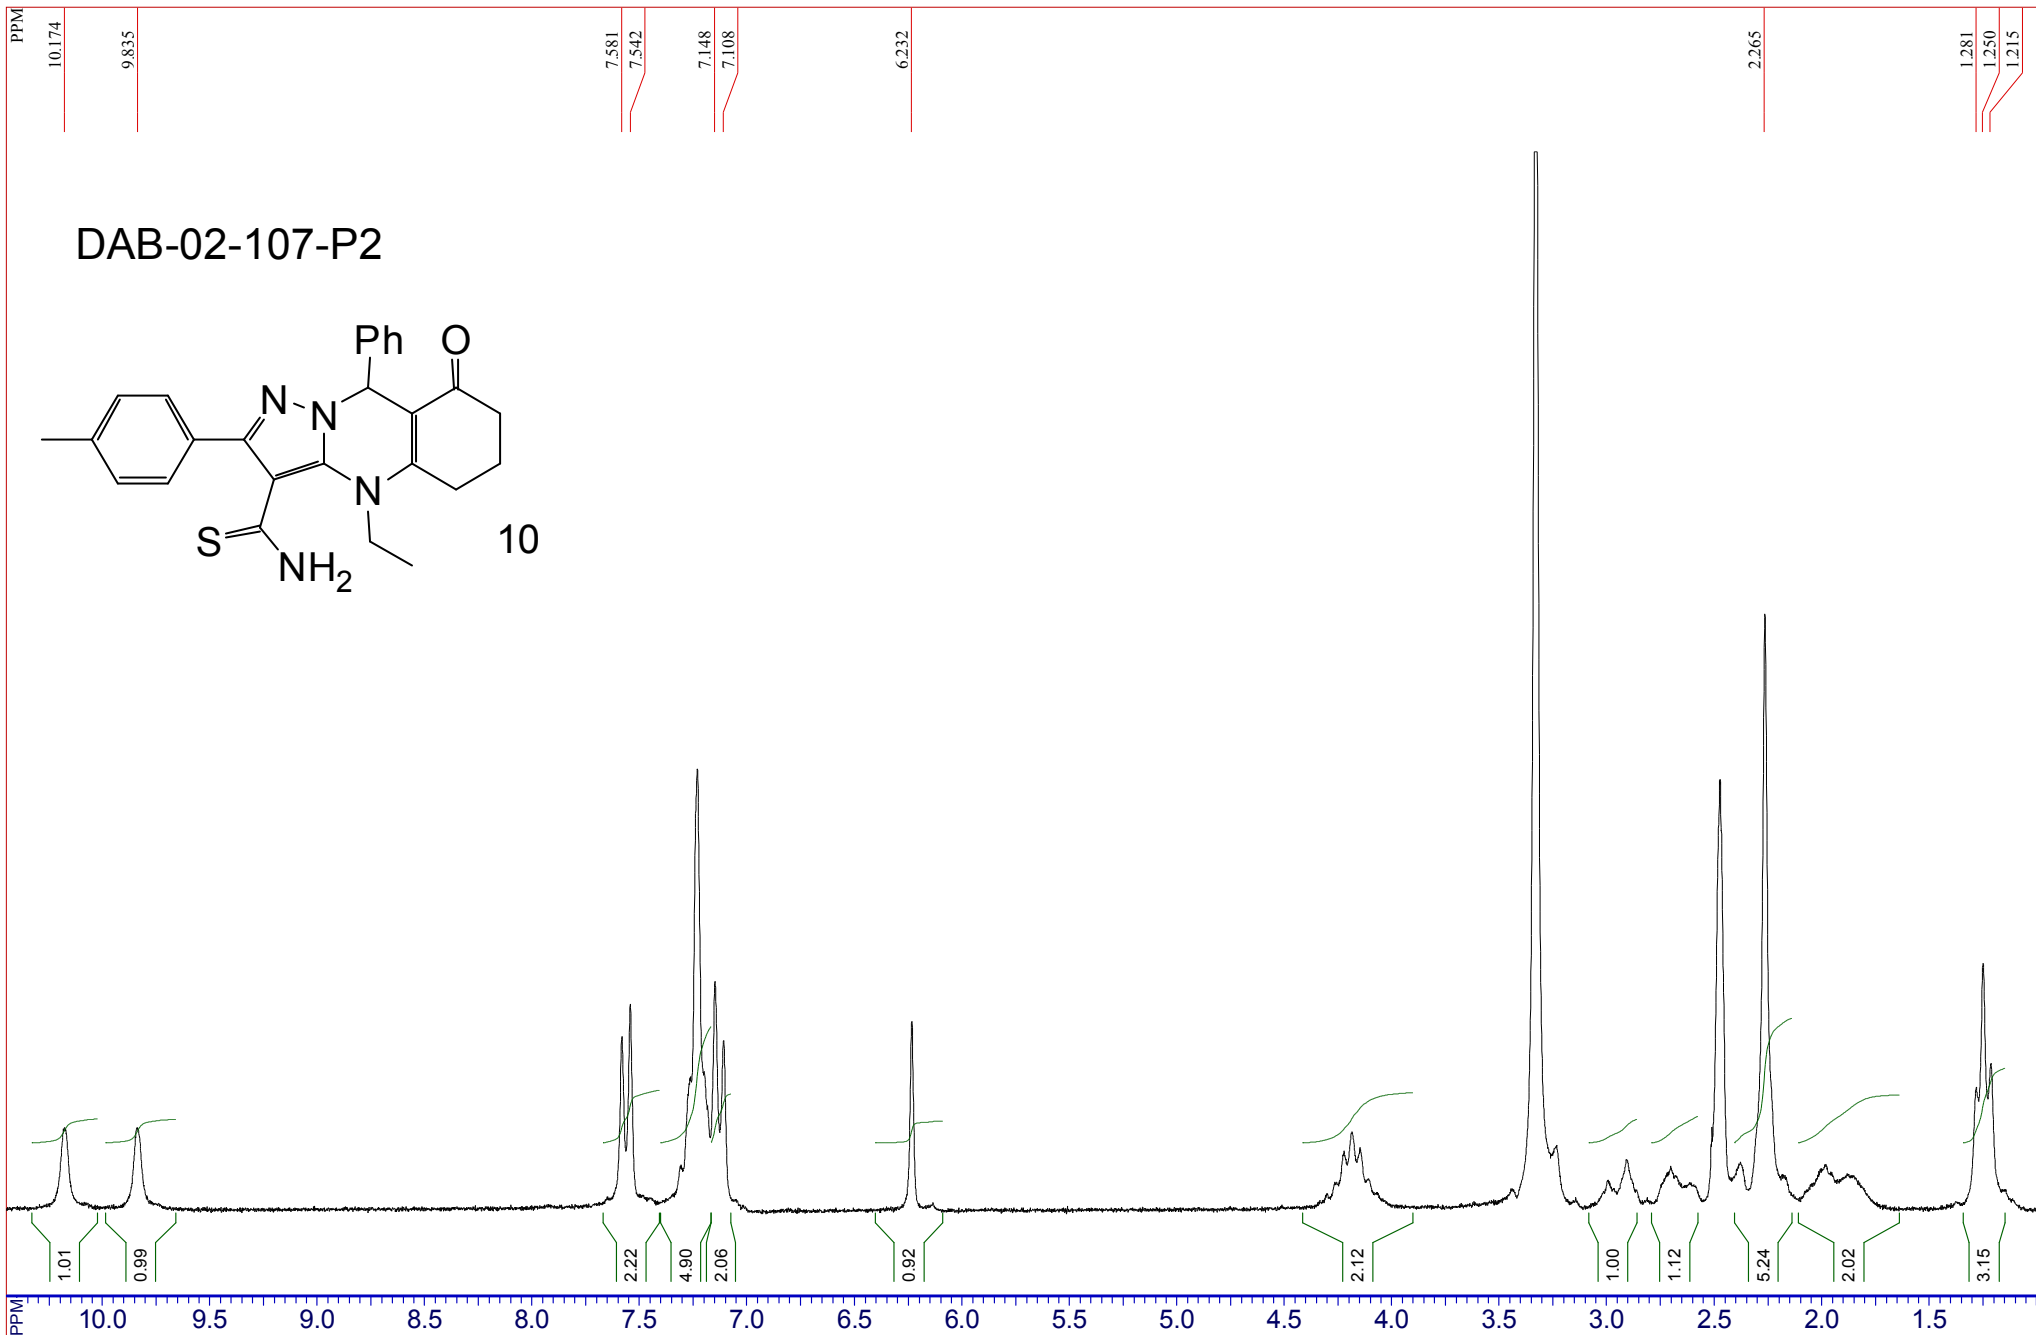

|                          |               |                  |           |                            |           |
|--------------------------|---------------|------------------|-----------|----------------------------|-----------|
| File name: DAB-02-107-P2 | Operator:     | SF: 199.9704 MHz | NSC: 0    | PW: 7.00 usec, RG: 39      | SI: 32768 |
| Date: 19-Apr-2012        | Solvent: DMSO | SW: 5501 Hz      | TE: 302 K | AQ: 1.98 sec, RD: 0.00 sec |           |

3. <sup>13</sup>C NMR spectra of synthesized compounds

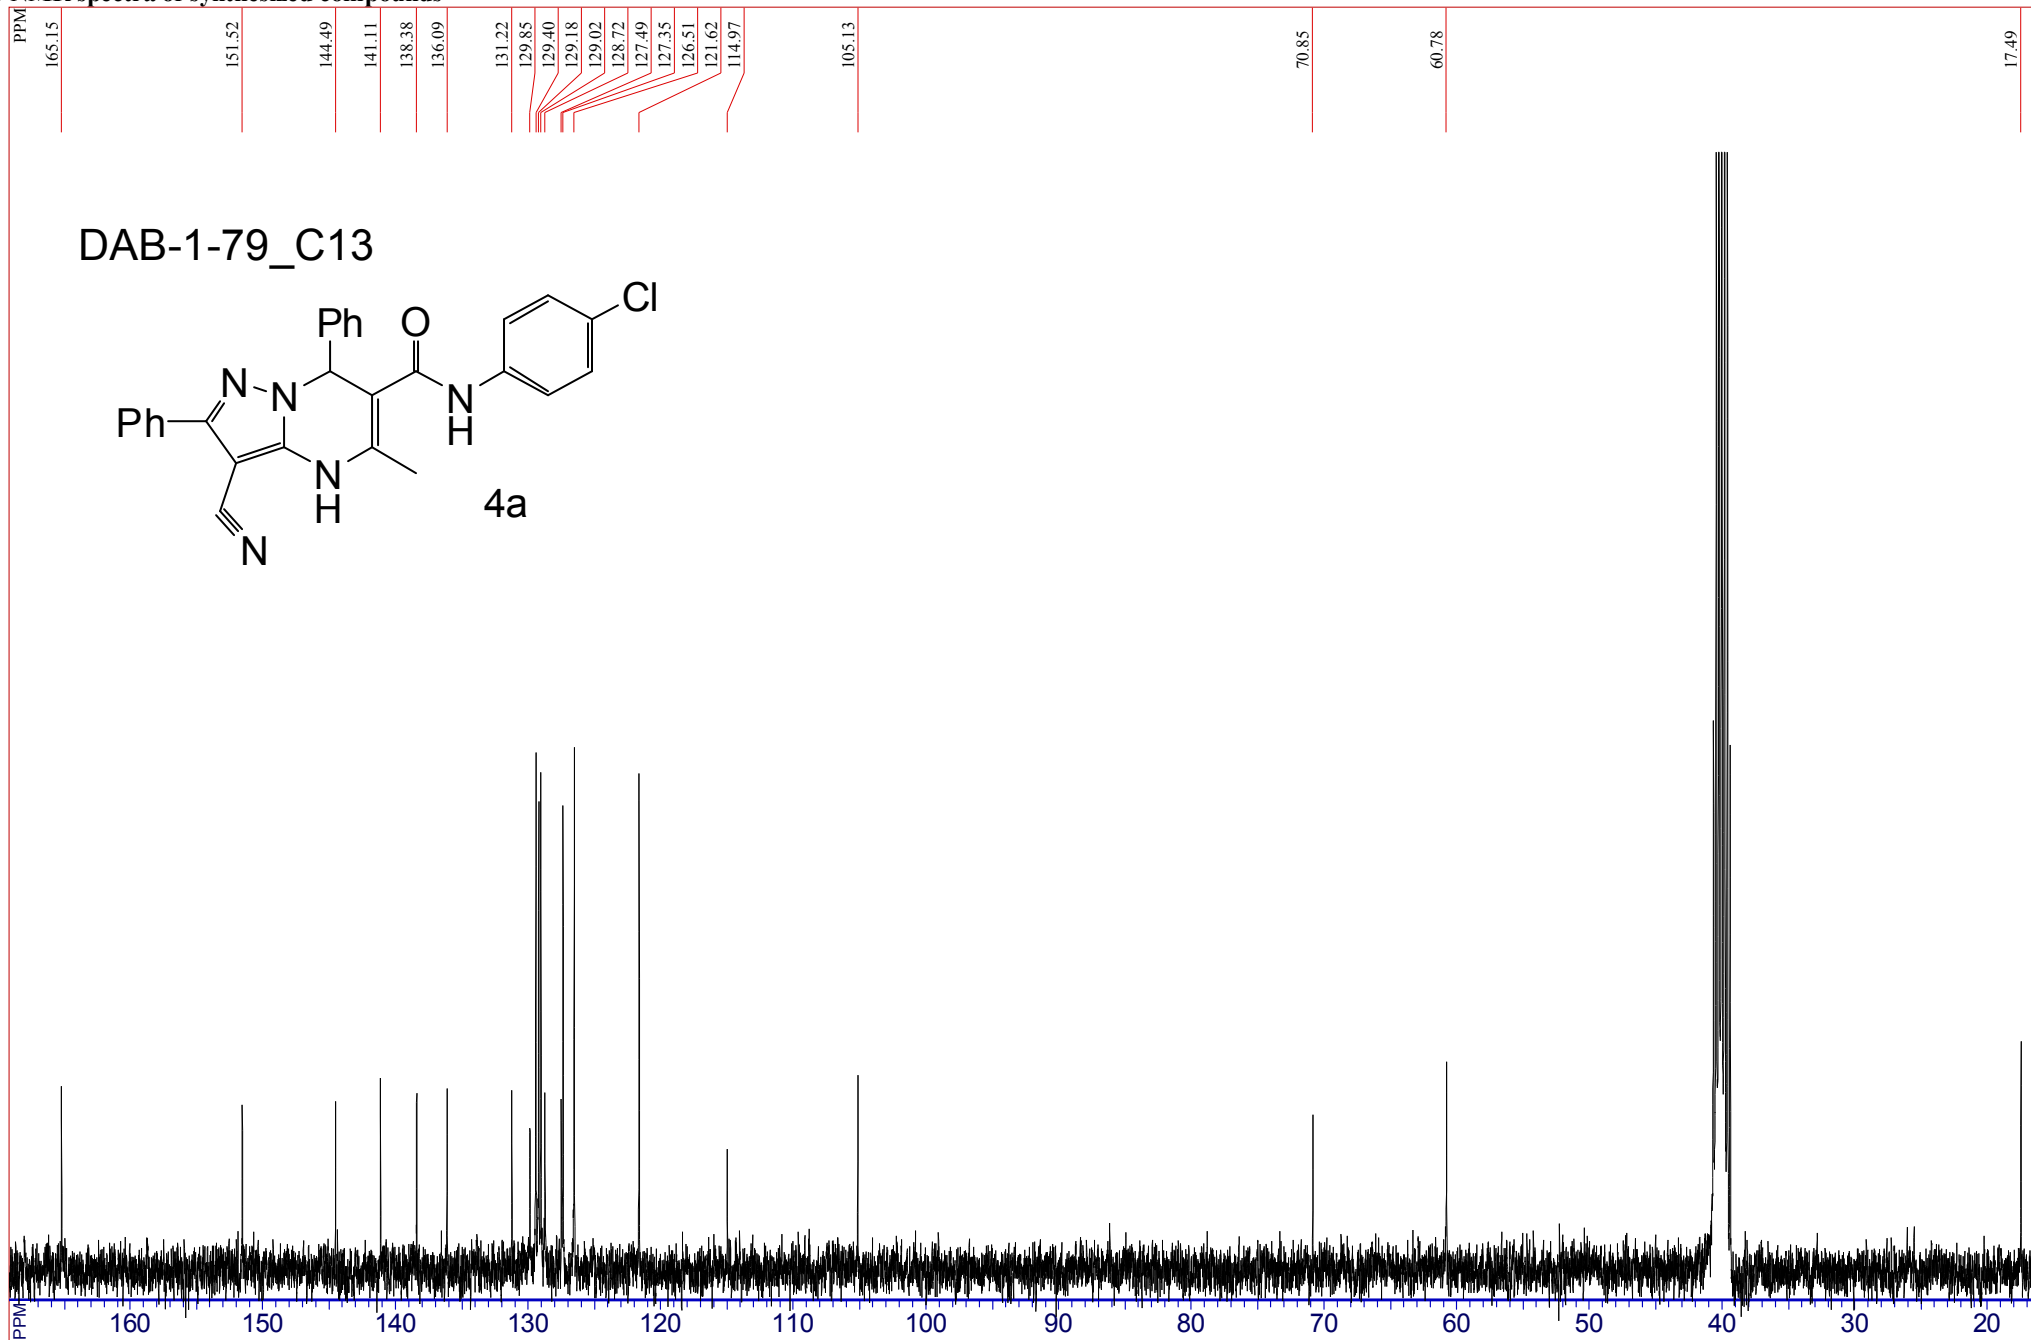

|                         |                  |                  |           |                            |                                     |
|-------------------------|------------------|------------------|-----------|----------------------------|-------------------------------------|
| File name: DAB-1-79_C13 | Operator: USER 1 | SF: 100.6128 MHz | NSC: 298  | PW: 0.00 usec, RG: 2050    | SI: 32768                           |
| Date: 24-Sep-2015       | Solvent: DMSO    | SW: 24038 Hz     | TE: 299 K | AQ: 1.36 sec, RD: 0.00 sec | Parameter file, TOPSPIN Version 2.1 |



# DAB-1-140-C13

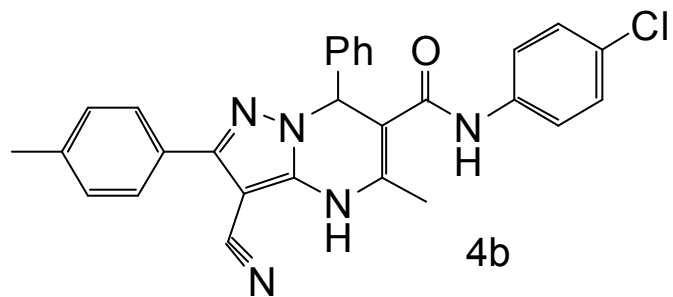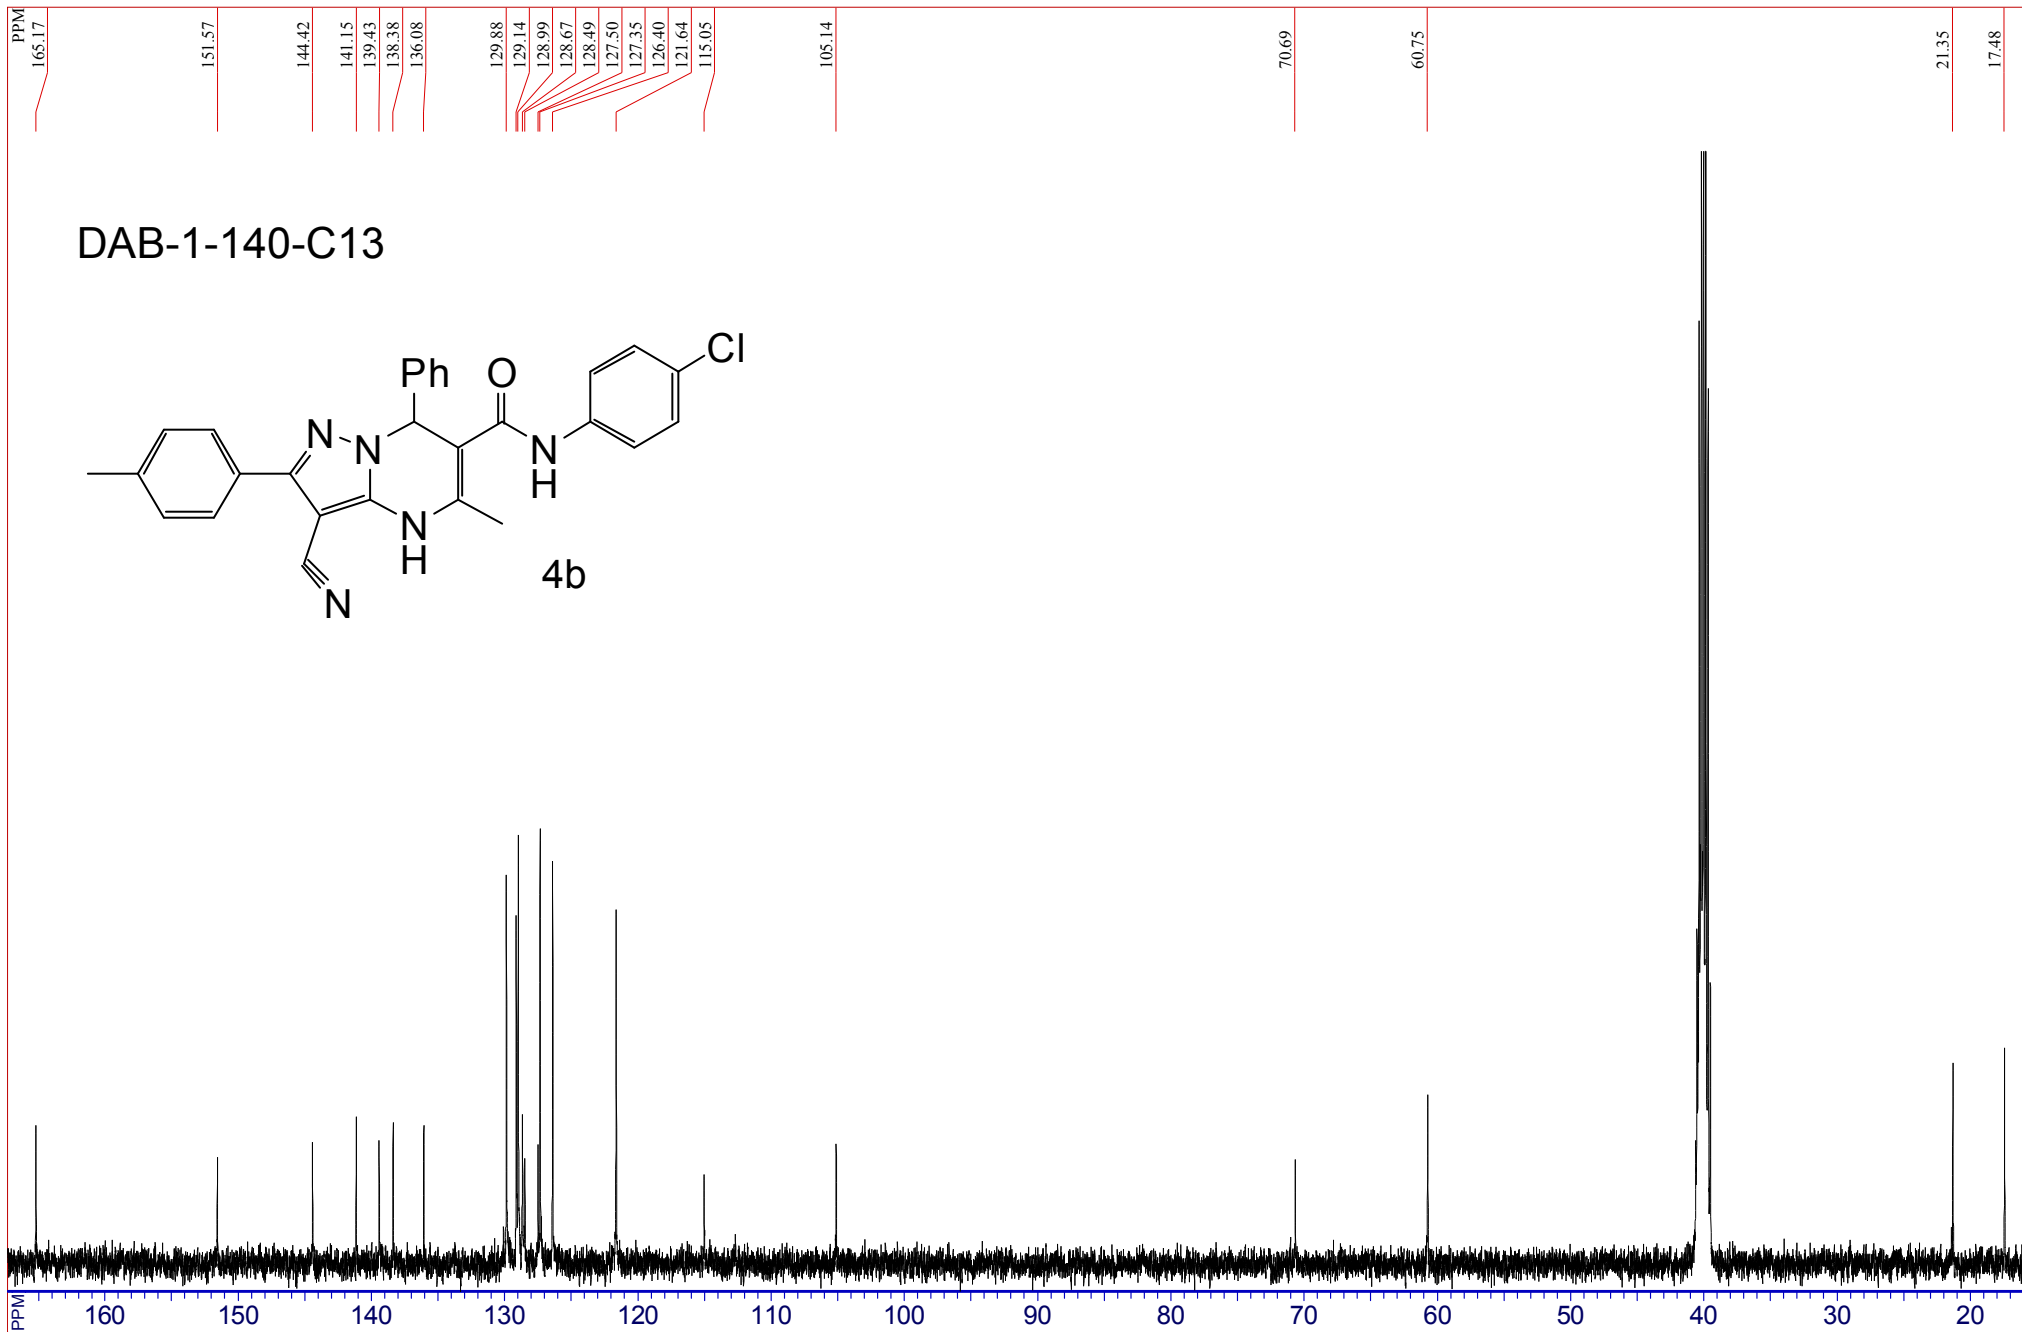

|                          |                |                  |          |                            |                                      |
|--------------------------|----------------|------------------|----------|----------------------------|--------------------------------------|
| File name: DAB-1-140-C13 | Operator: root | SF: 125.7422 MHz | NSC: 294 | PW: 0.00 usec, RG: 51200   | SI: 65536                            |
| Date: 29-May-2012        | Solvent: dmsol | SW: 32680 Hz     | TE: 0 K  | AQ: 1.57 sec, RD: 0.00 sec | Parameter file, XWIN-NMR Version 3.5 |

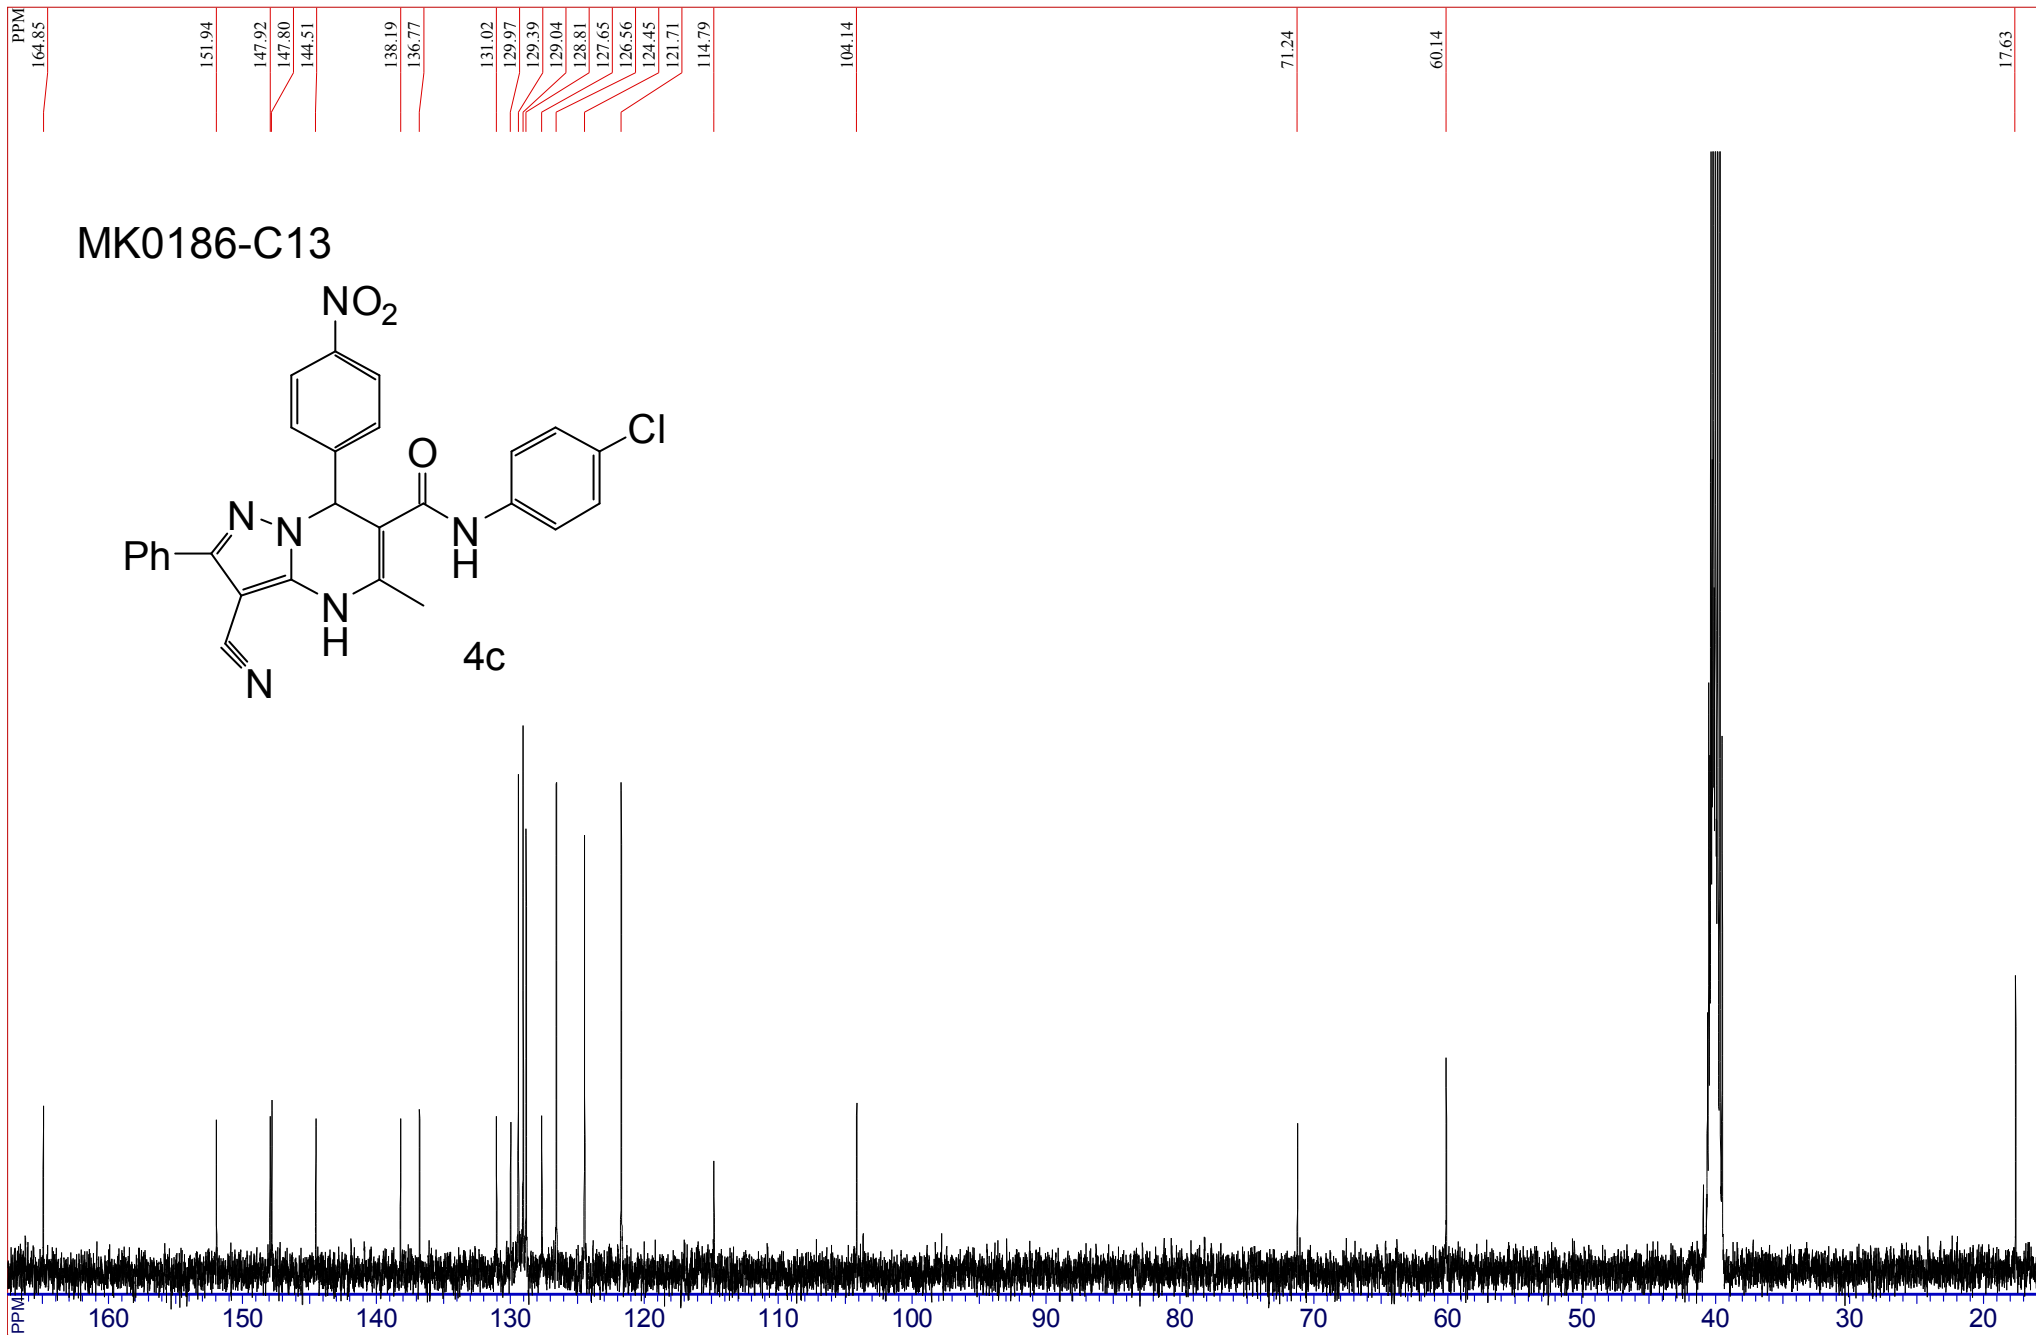

|                       |                |                  |          |                            |           |
|-----------------------|----------------|------------------|----------|----------------------------|-----------|
| File name: MK0186-C13 | Operator: root | SF: 125.7422 MHz | NSC: 276 | PW: 0.00 usec, RG: 51200   | SI: 65536 |
| Date: 12-Apr-2012     | Solvent: dms0  | SW: 32680 Hz     | TE: 0 K  | AQ: 1.57 sec, RD: 0.00 sec |           |

# DAB-1-93-C13

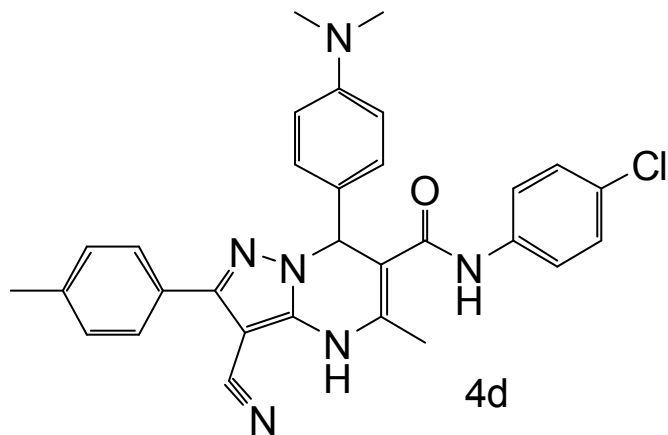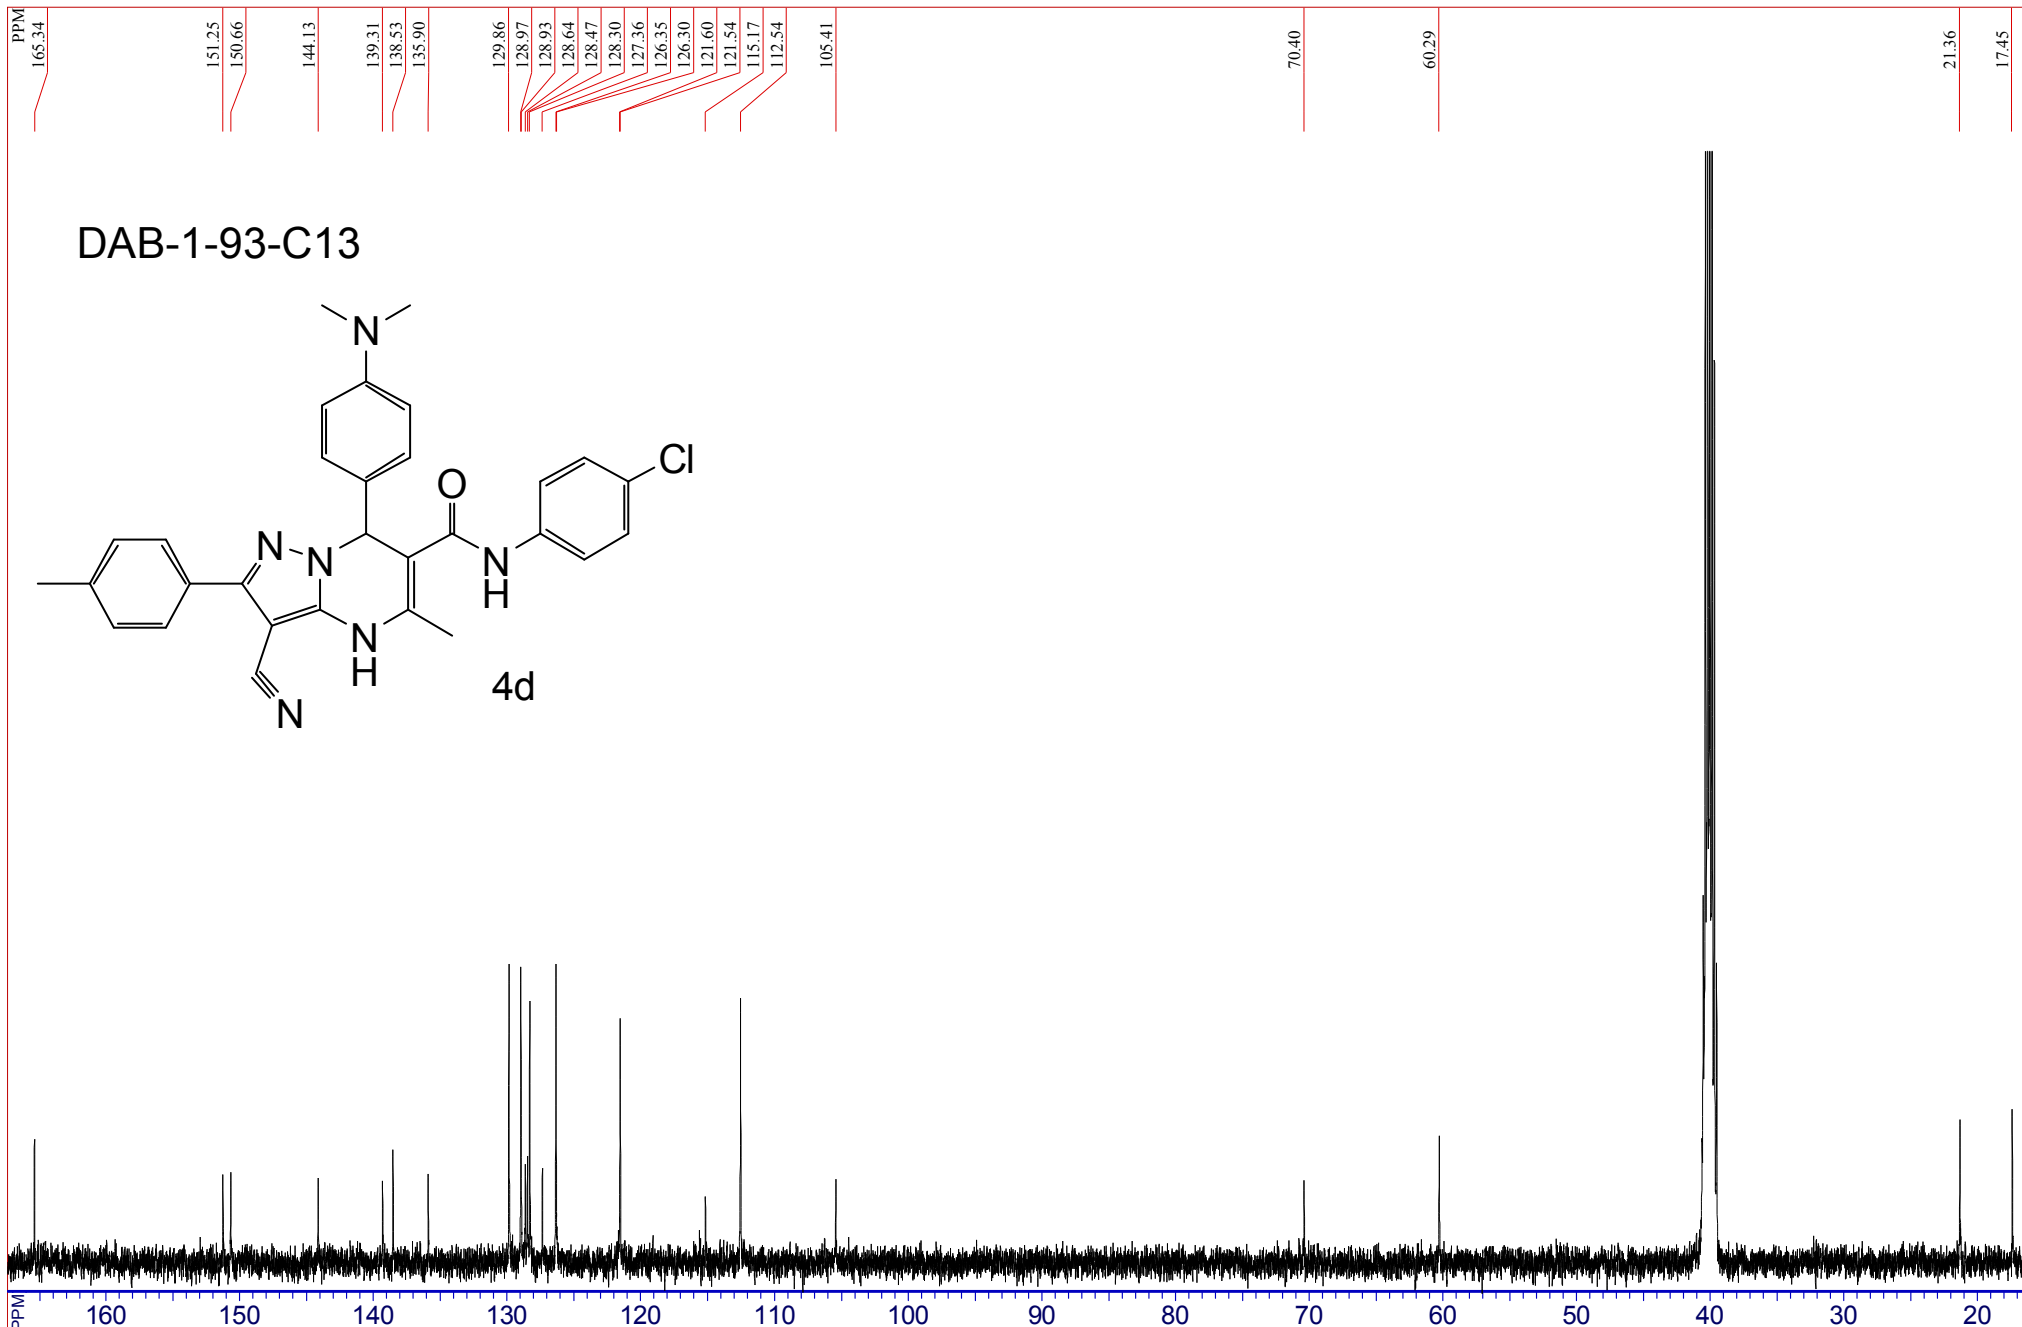

|                         |                |                  |          |                            |                                      |
|-------------------------|----------------|------------------|----------|----------------------------|--------------------------------------|
| File name: DAB-1-93-C13 | Operator: root | SF: 125.7422 MHz | NSC: 284 | PW: 0.00 usec, RG: 51200   | SI: 65536                            |
| Date: 29-May-2012       | Solvent: dmso  | SW: 32680 Hz     | TE: 0 K  | AQ: 1.57 sec, RD: 0.00 sec | Parameter file, XWIN-NMR Version 3.5 |

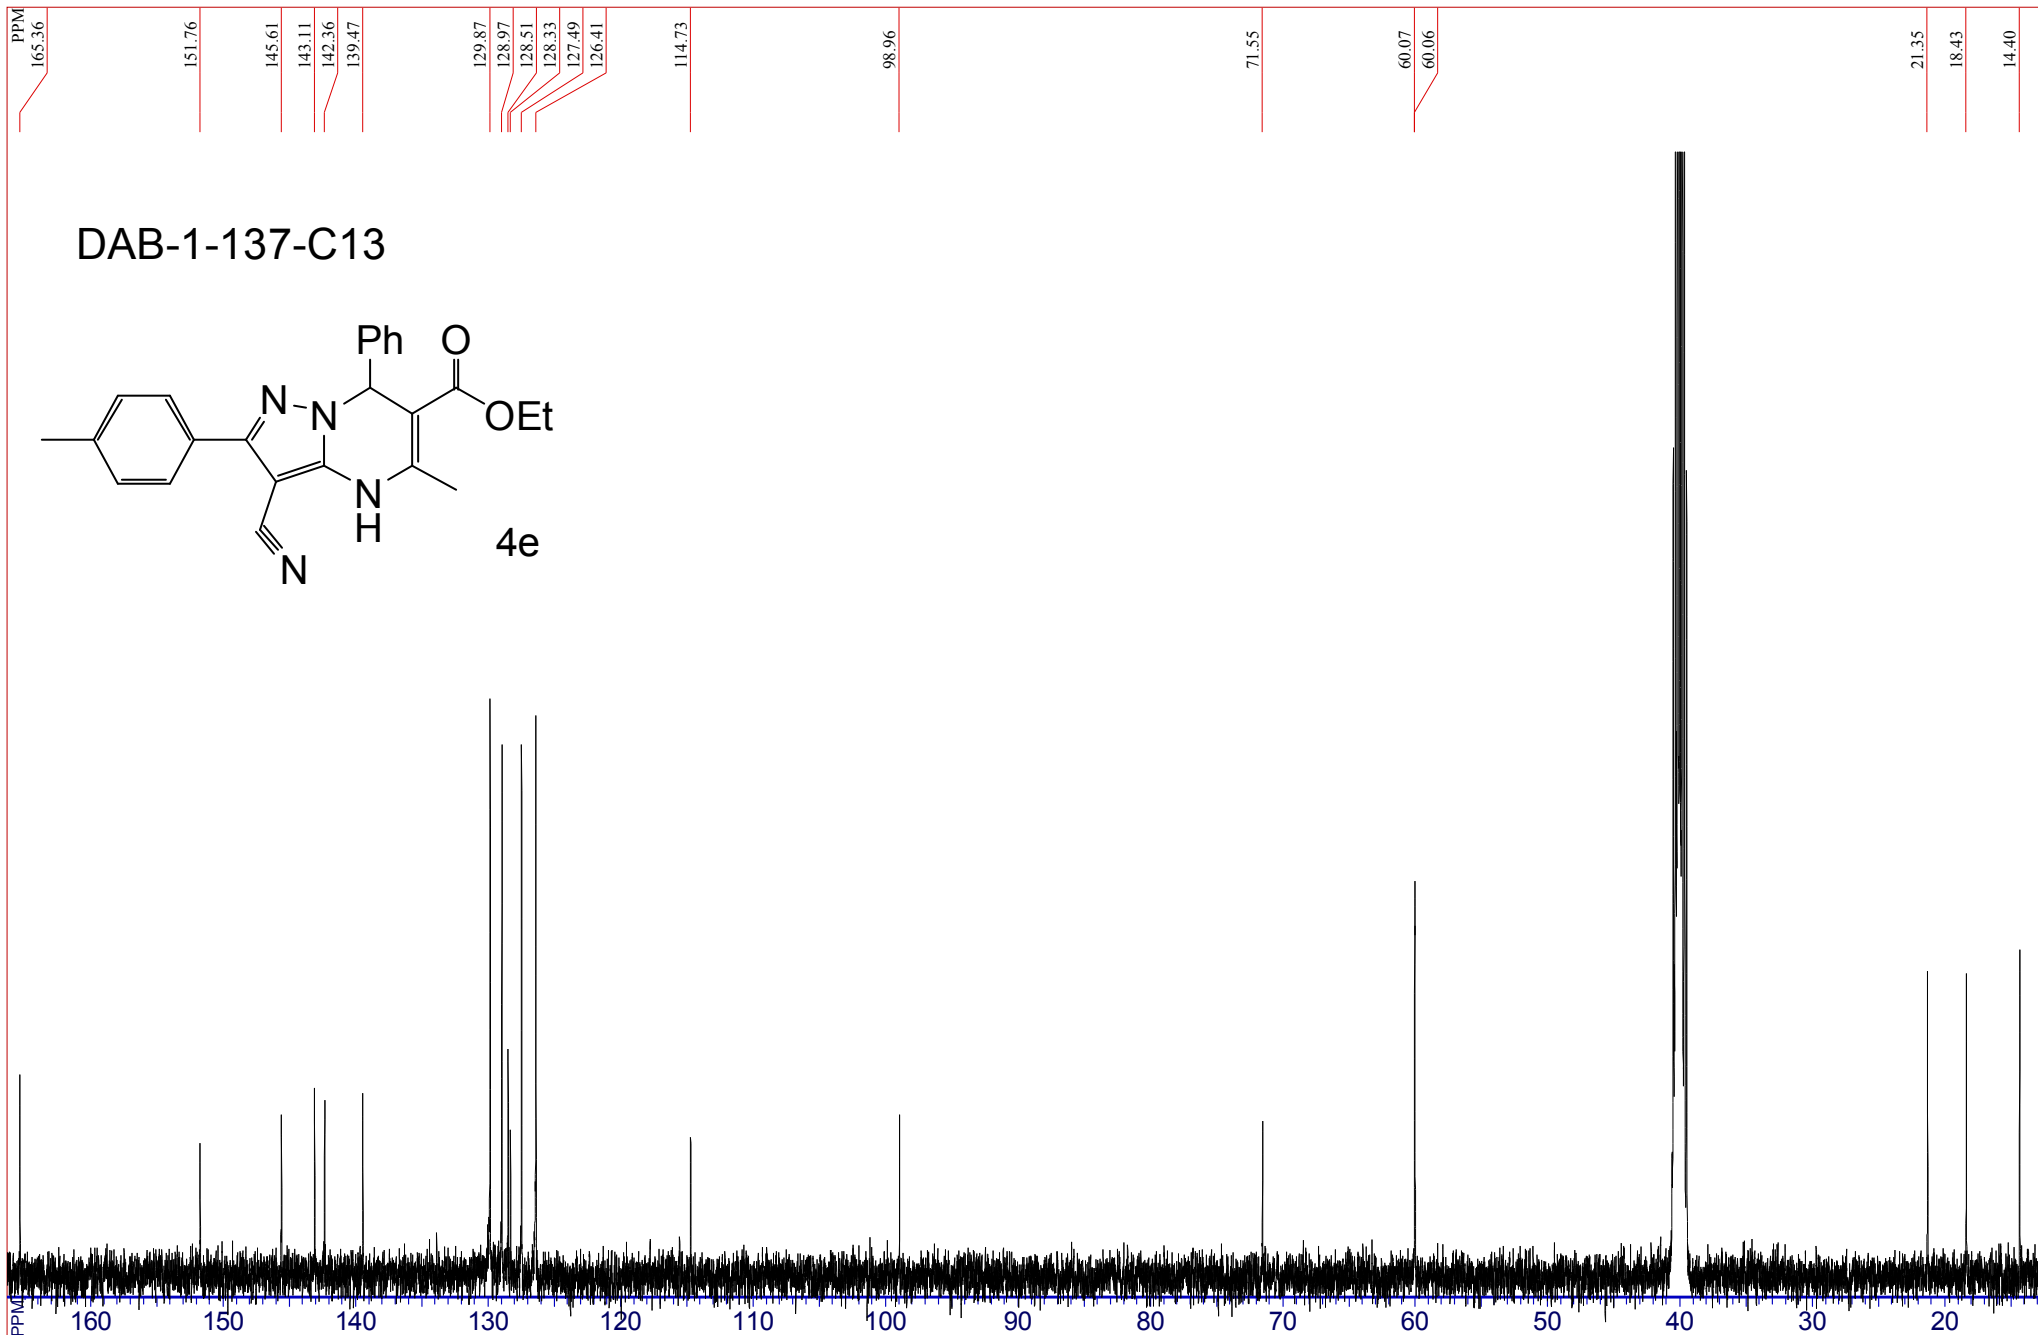

|                          |                |                  |          |                            |                                      |
|--------------------------|----------------|------------------|----------|----------------------------|--------------------------------------|
| File name: DAB-1-137-C13 | Operator: root | SF: 125.7422 MHz | NSC: 221 | PW: 0.00 usec, RG: 51200   | SI: 65536                            |
| Date: 29-May-2012        | Solvent: dmso  | SW: 32680 Hz     | TE: 0 K  | AQ: 1.57 sec, RD: 0.00 sec | Parameter file, XWIN-NMR Version 3.5 |

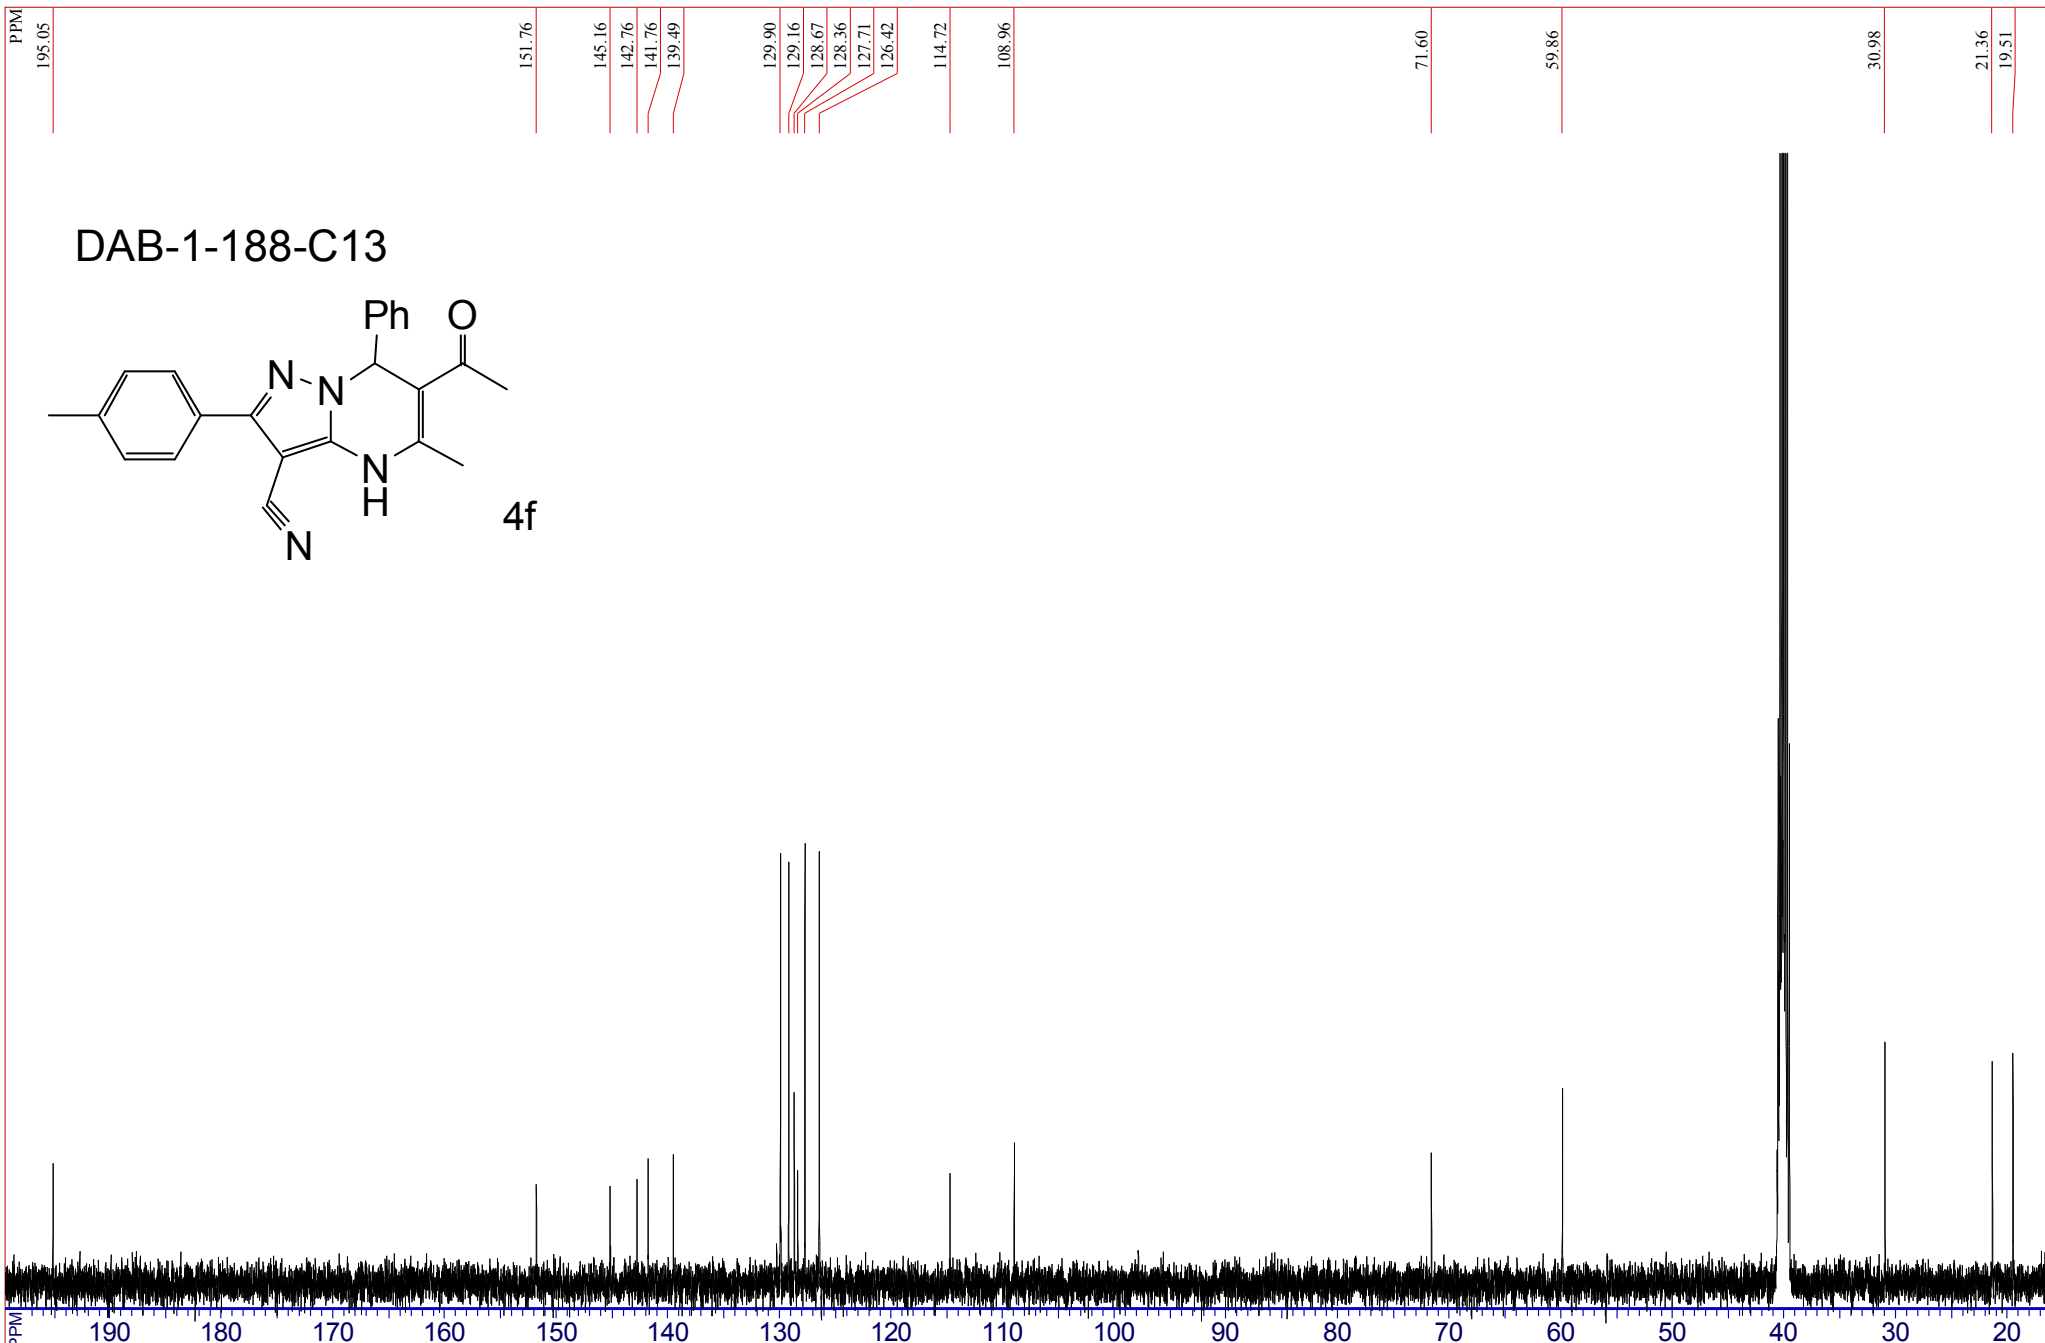

|                          |                |                  |          |                            |                                      |
|--------------------------|----------------|------------------|----------|----------------------------|--------------------------------------|
| File name: DAB-1-188-C13 | Operator: root | SF: 125.7422 MHz | NSC: 267 | PW: 0.00 usec, RG: 51200   | SI: 65536                            |
| Date: 29-May-2012        | Solvent: dms0  | SW: 32680 Hz     | TE: 0 K  | AQ: 1.57 sec, RD: 0.00 sec | Parameter file, XWIN-NMR Version 3.5 |

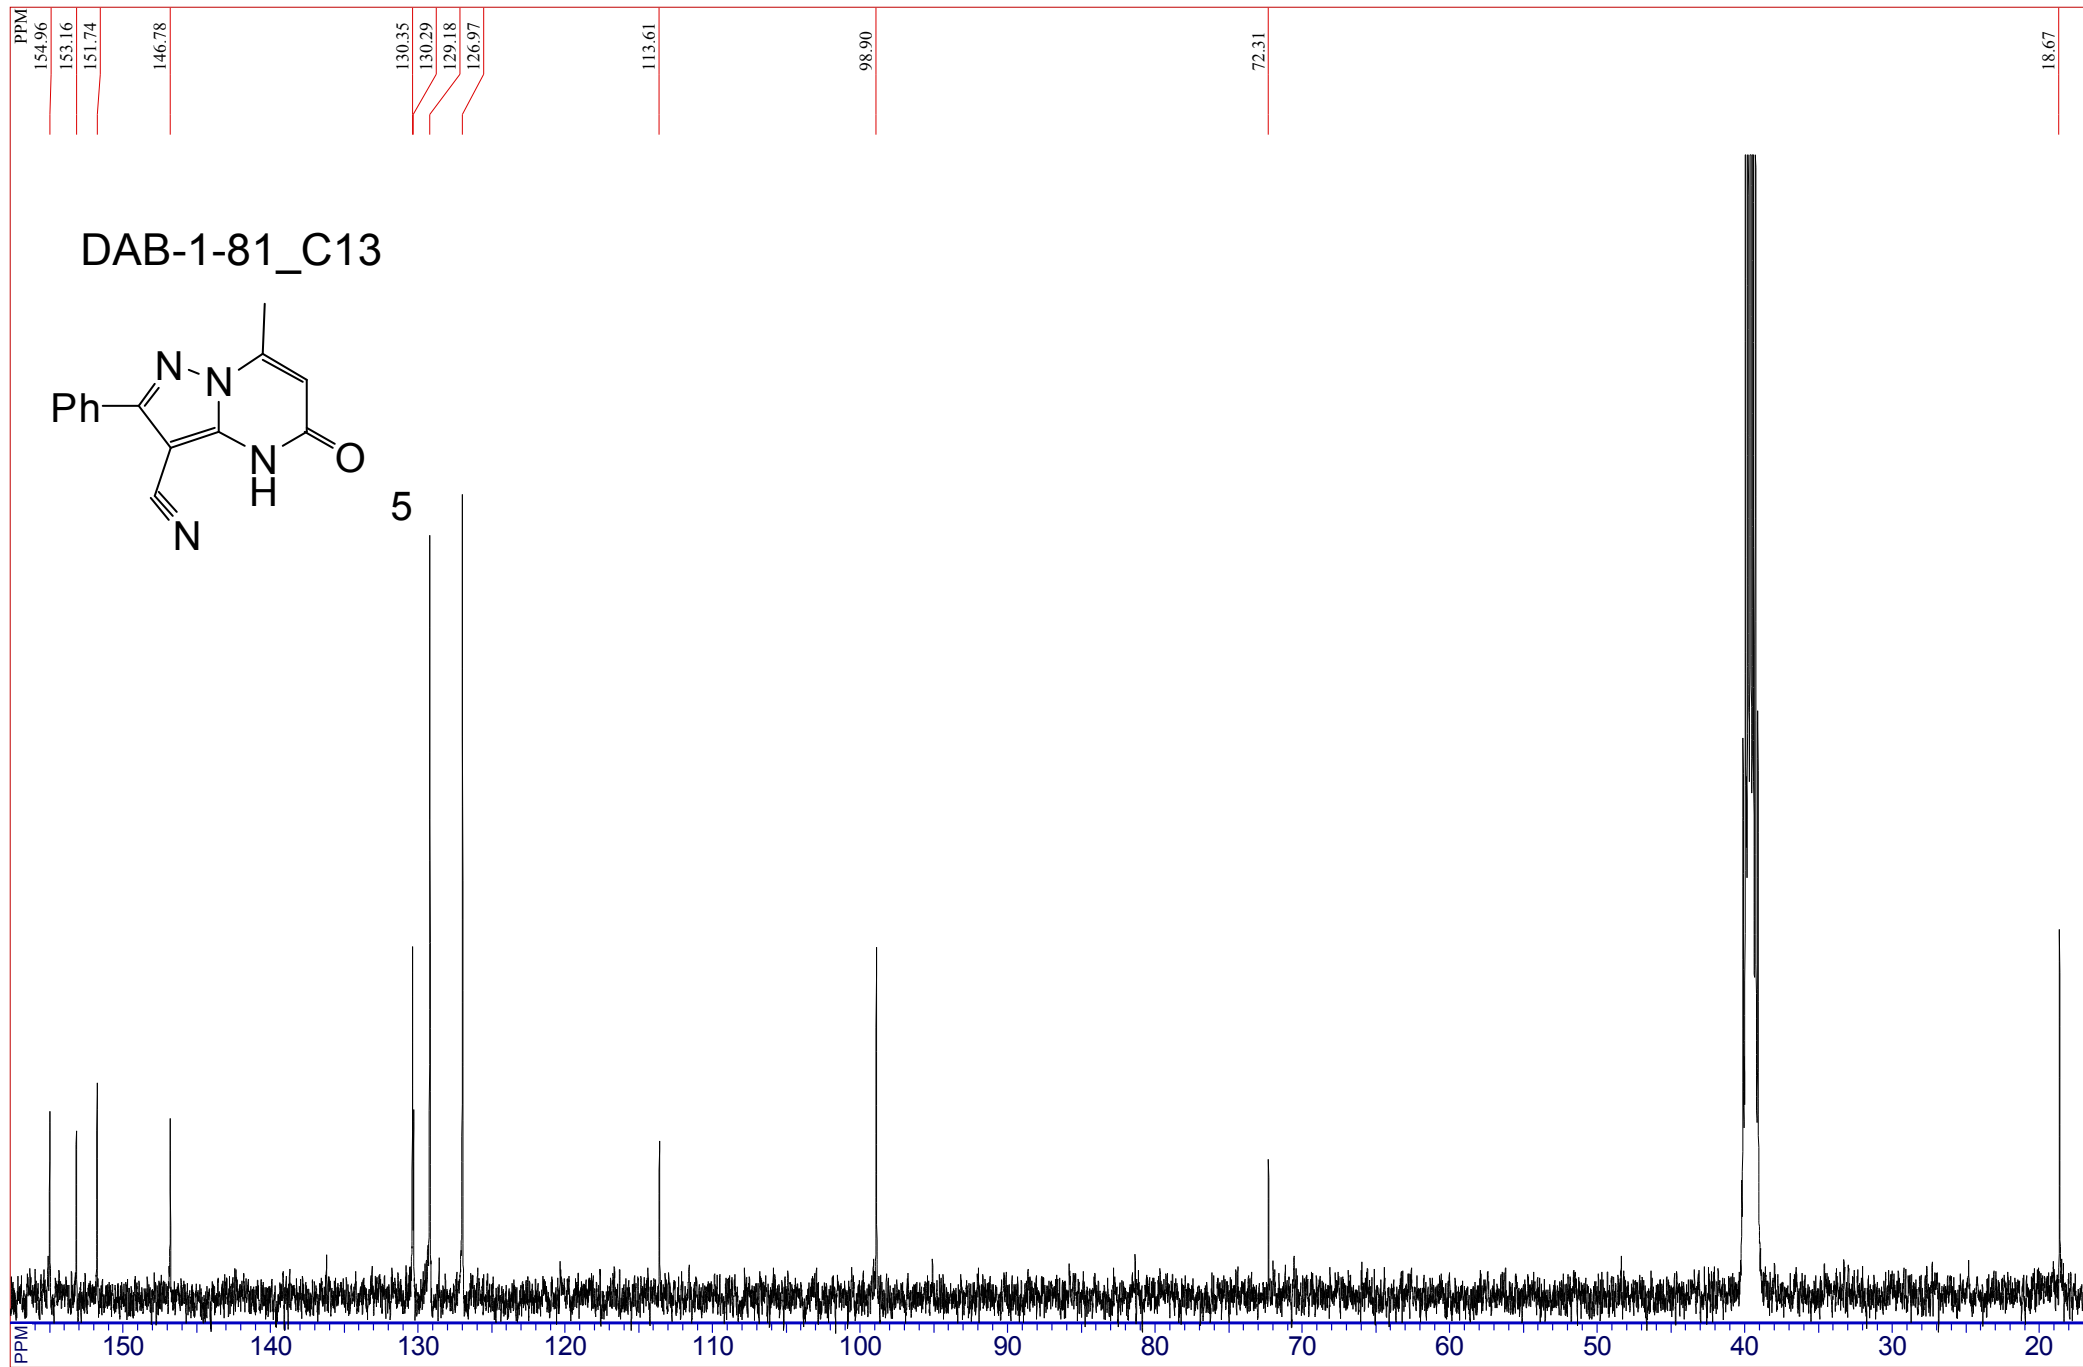

|                         |                |                  |          |                            |                                      |
|-------------------------|----------------|------------------|----------|----------------------------|--------------------------------------|
| File name: DAB-1-81_C13 | Operator: root | SF: 125.7126 MHz | NSC: 238 | PW: 0.00 usec, RG: 51200   | SI: 65536                            |
| Date: 24-Sep-2015       | Solvent: dmso  | SW: 32680 Hz     | TE: 0 K  | AQ: 1.57 sec, RD: 0.00 sec | Parameter file, XWIN-NMR Version 3.5 |

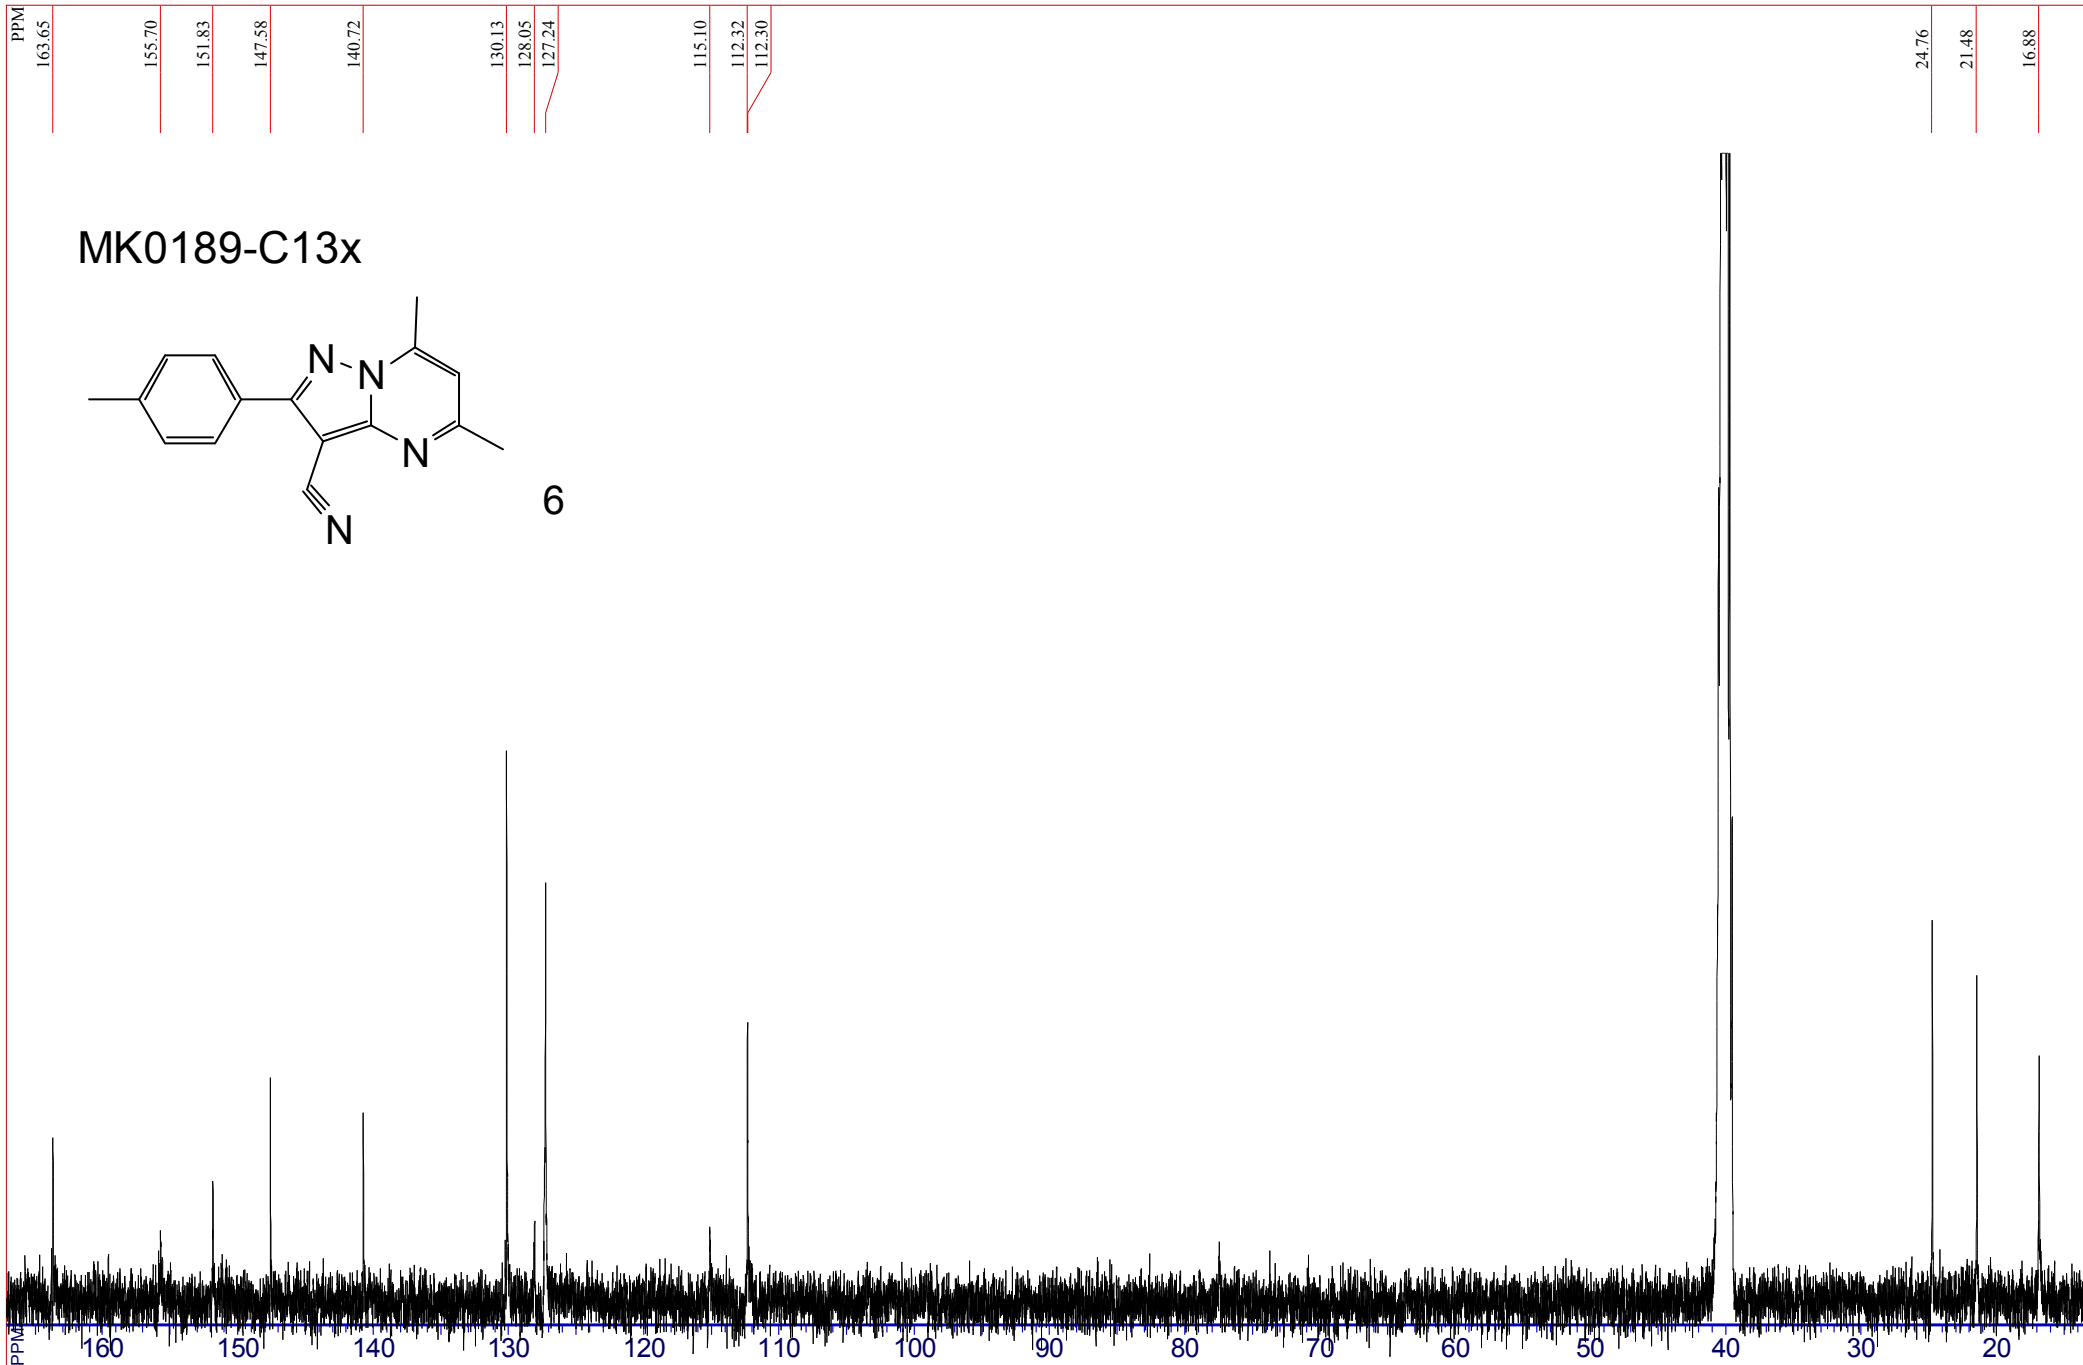

File name: MK0189-C13x

Operator: root

SF: 125.7422 MHz

NSC: 700

PW: 0.00 usec, RG: 51200

SI: 65536

Date: 29-May-2012

Solvent: dms0

SW: 32680 Hz

TE: 0 K

AQ: 1.57 sec, RD: 0.00 sec

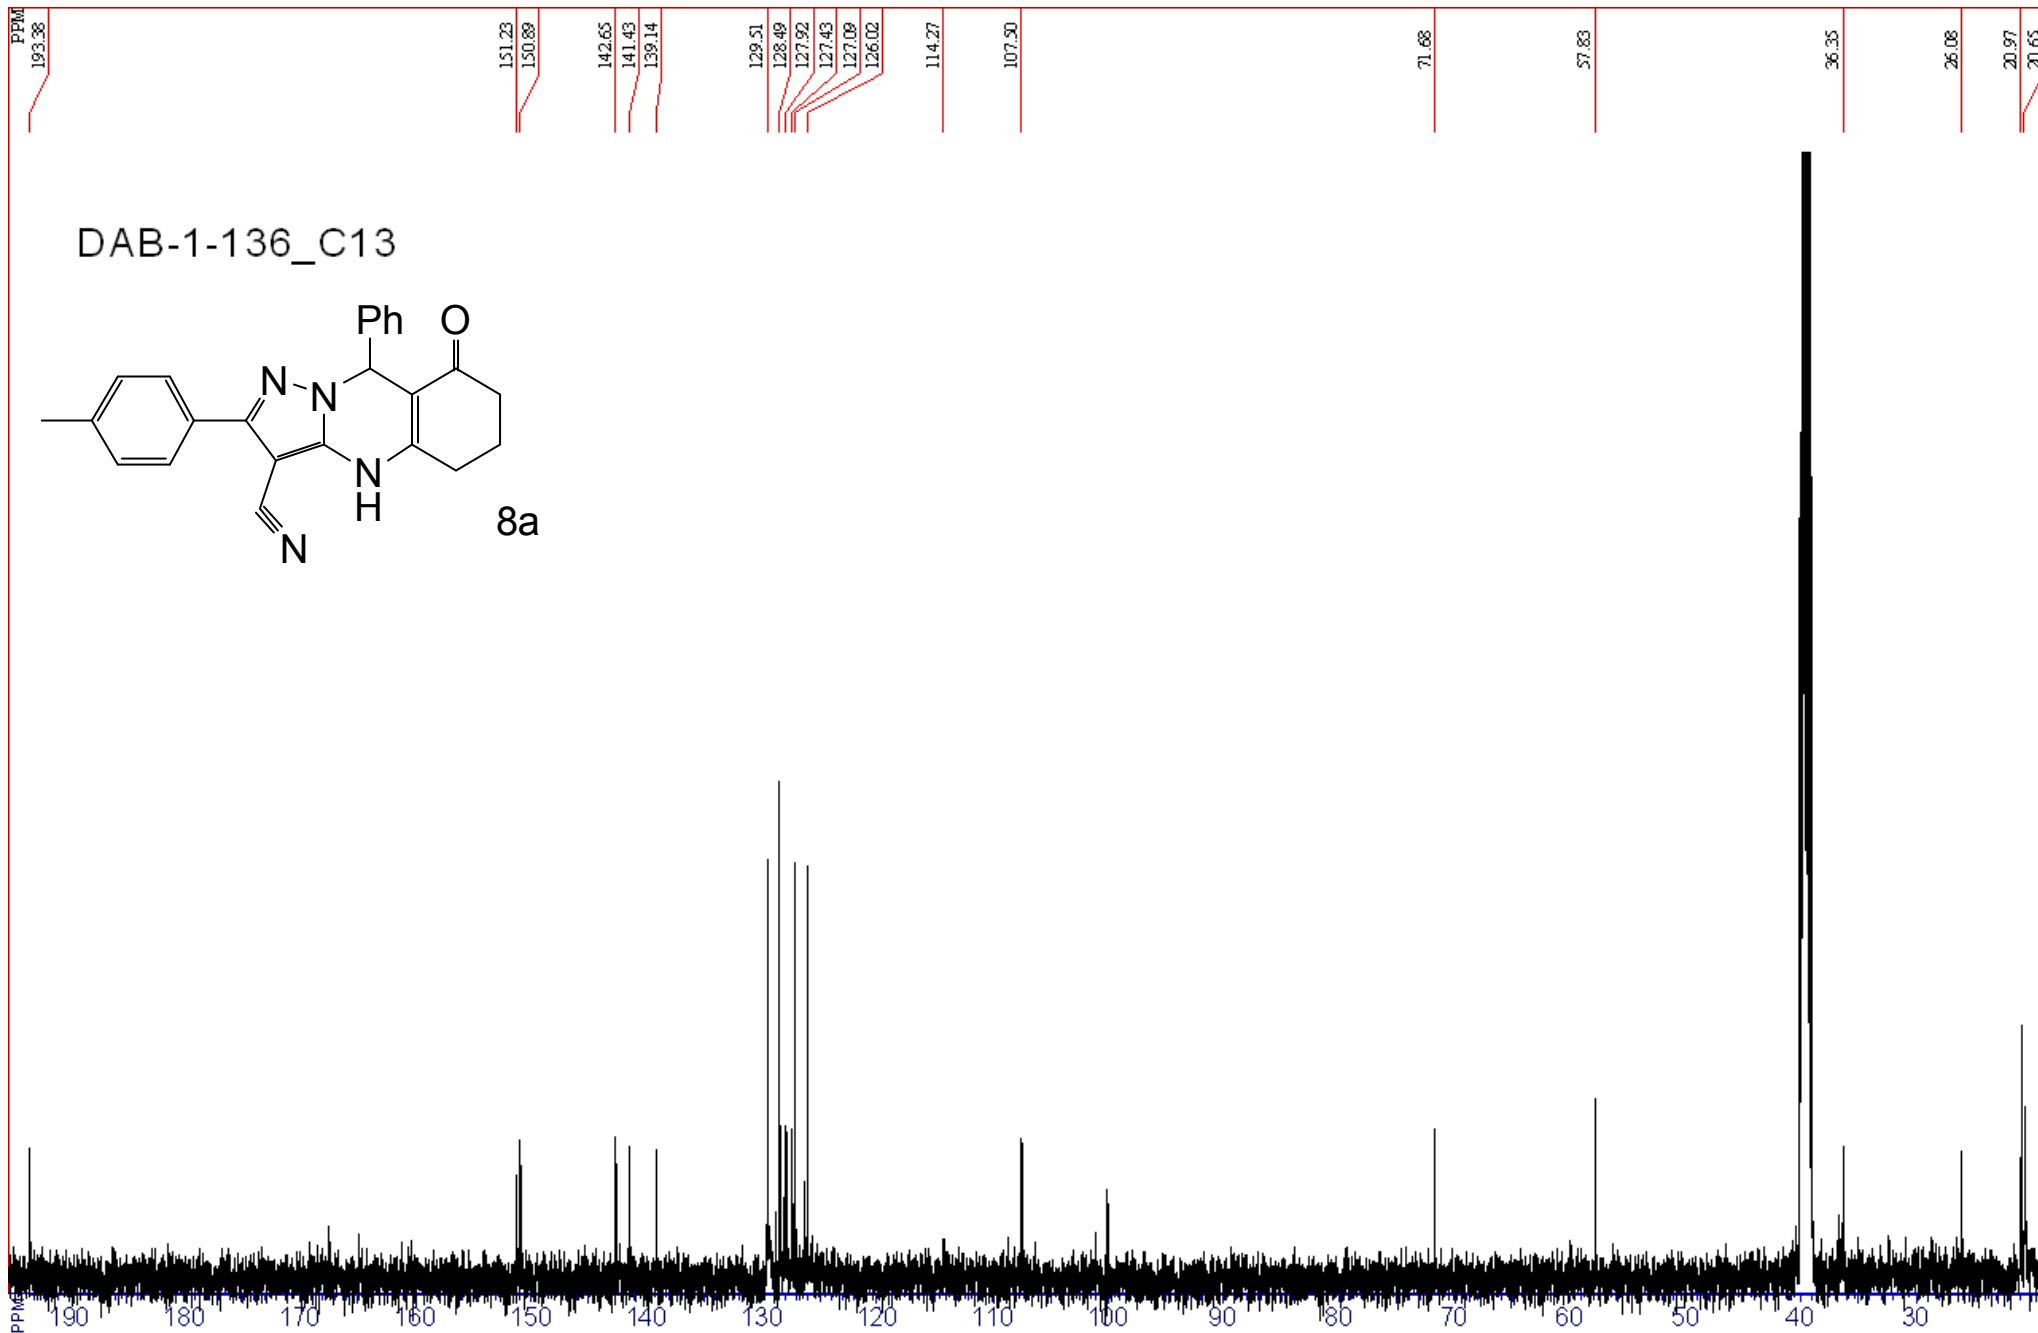

|                          |                |                  |          |                            |           |
|--------------------------|----------------|------------------|----------|----------------------------|-----------|
| File name: DAB-1-136_C13 | Operator: root | SF: 125.7126 MHz | NSC: 412 | PW: 0.00 usec, RG: 51200   | SI: 65536 |
| Date: 24-Sep-2015        | Solvent: dms0  | SW: 32680 Hz     | TE: 0 K  | AQ: 1.57 sec, RD: 0.00 sec |           |



PPM

193.74

151.39

150.79

150.47

142.90

139.41

129.87

129.53

128.43

128.13

126.38

114.79

112.48

108.32

71.80

57.73

36.85

26.47

21.37

21.14

MK0187-C13

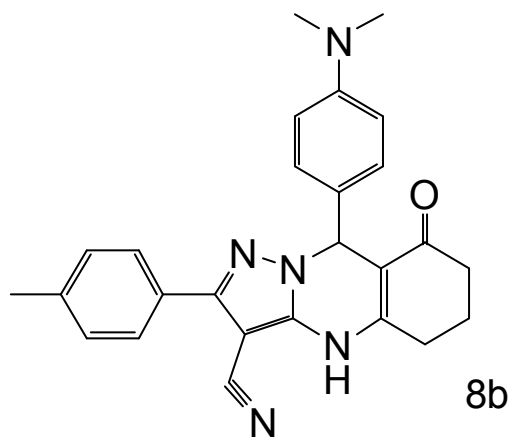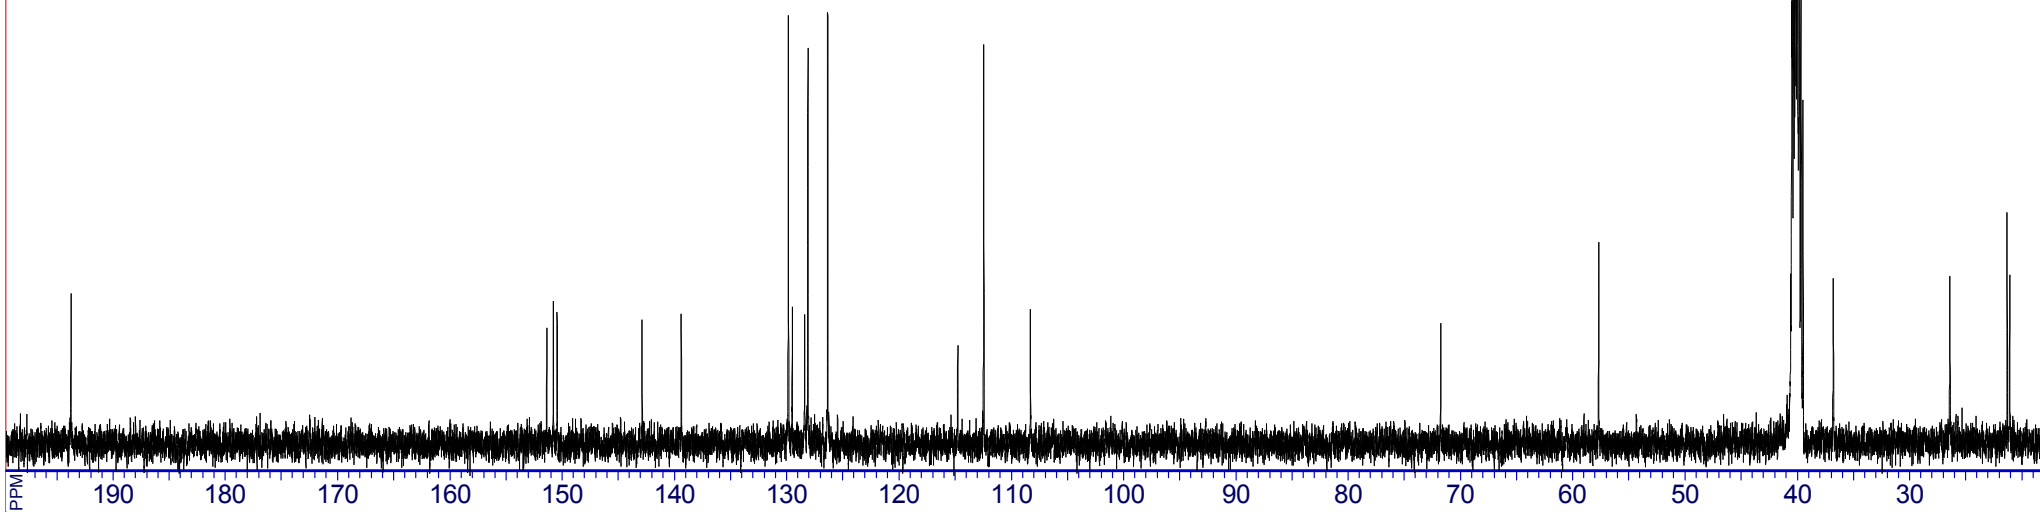

PPM

File name: MK0187-C13

Operator: root

SF: 125.7422 MHz

NSC: 186

PW: 0.00 usec, RG: 51200

SI: 65536

Date: 12-Apr-2012

Solvent: dmsol

SW: 32680 Hz

TE: 0 K

AQ: 1.57 sec, RD: 0.00 sec

Parameter file, XWIN-NMR Version 3.5

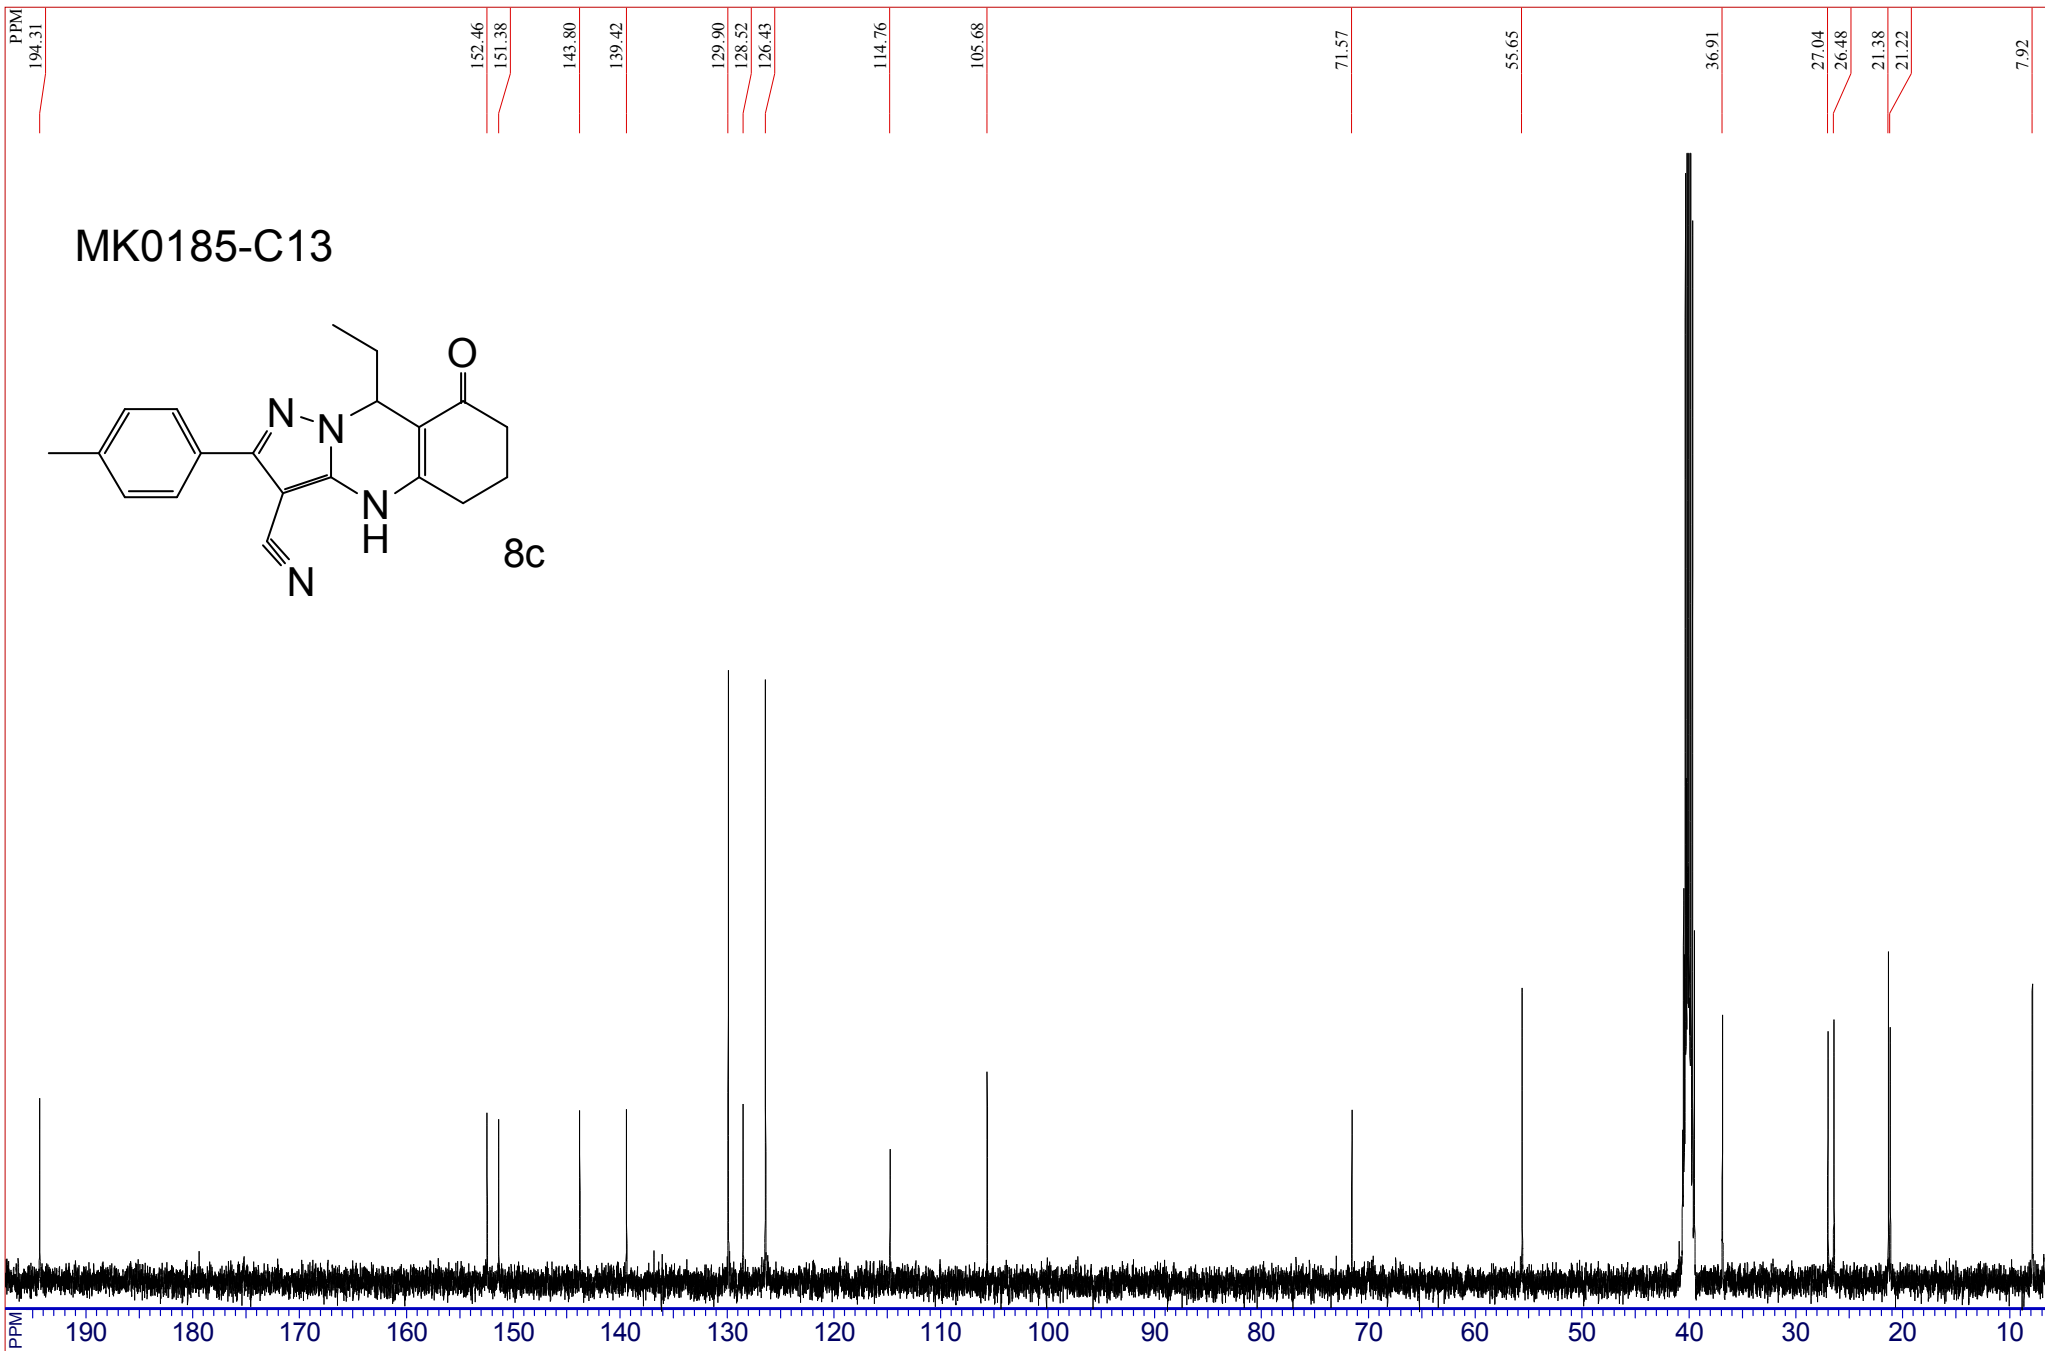

|                       |                |                  |          |                            |           |
|-----------------------|----------------|------------------|----------|----------------------------|-----------|
| File name: MK0185-C13 | Operator: root | SF: 125.7422 MHz | NSC: 201 | PW: 0.00 usec, RG: 51200   | SI: 65536 |
| Date: 12-Apr-2012     | Solvent: dms0  | SW: 32680 Hz     | TE: 0 K  | AQ: 1.57 sec, RD: 0.00 sec |           |

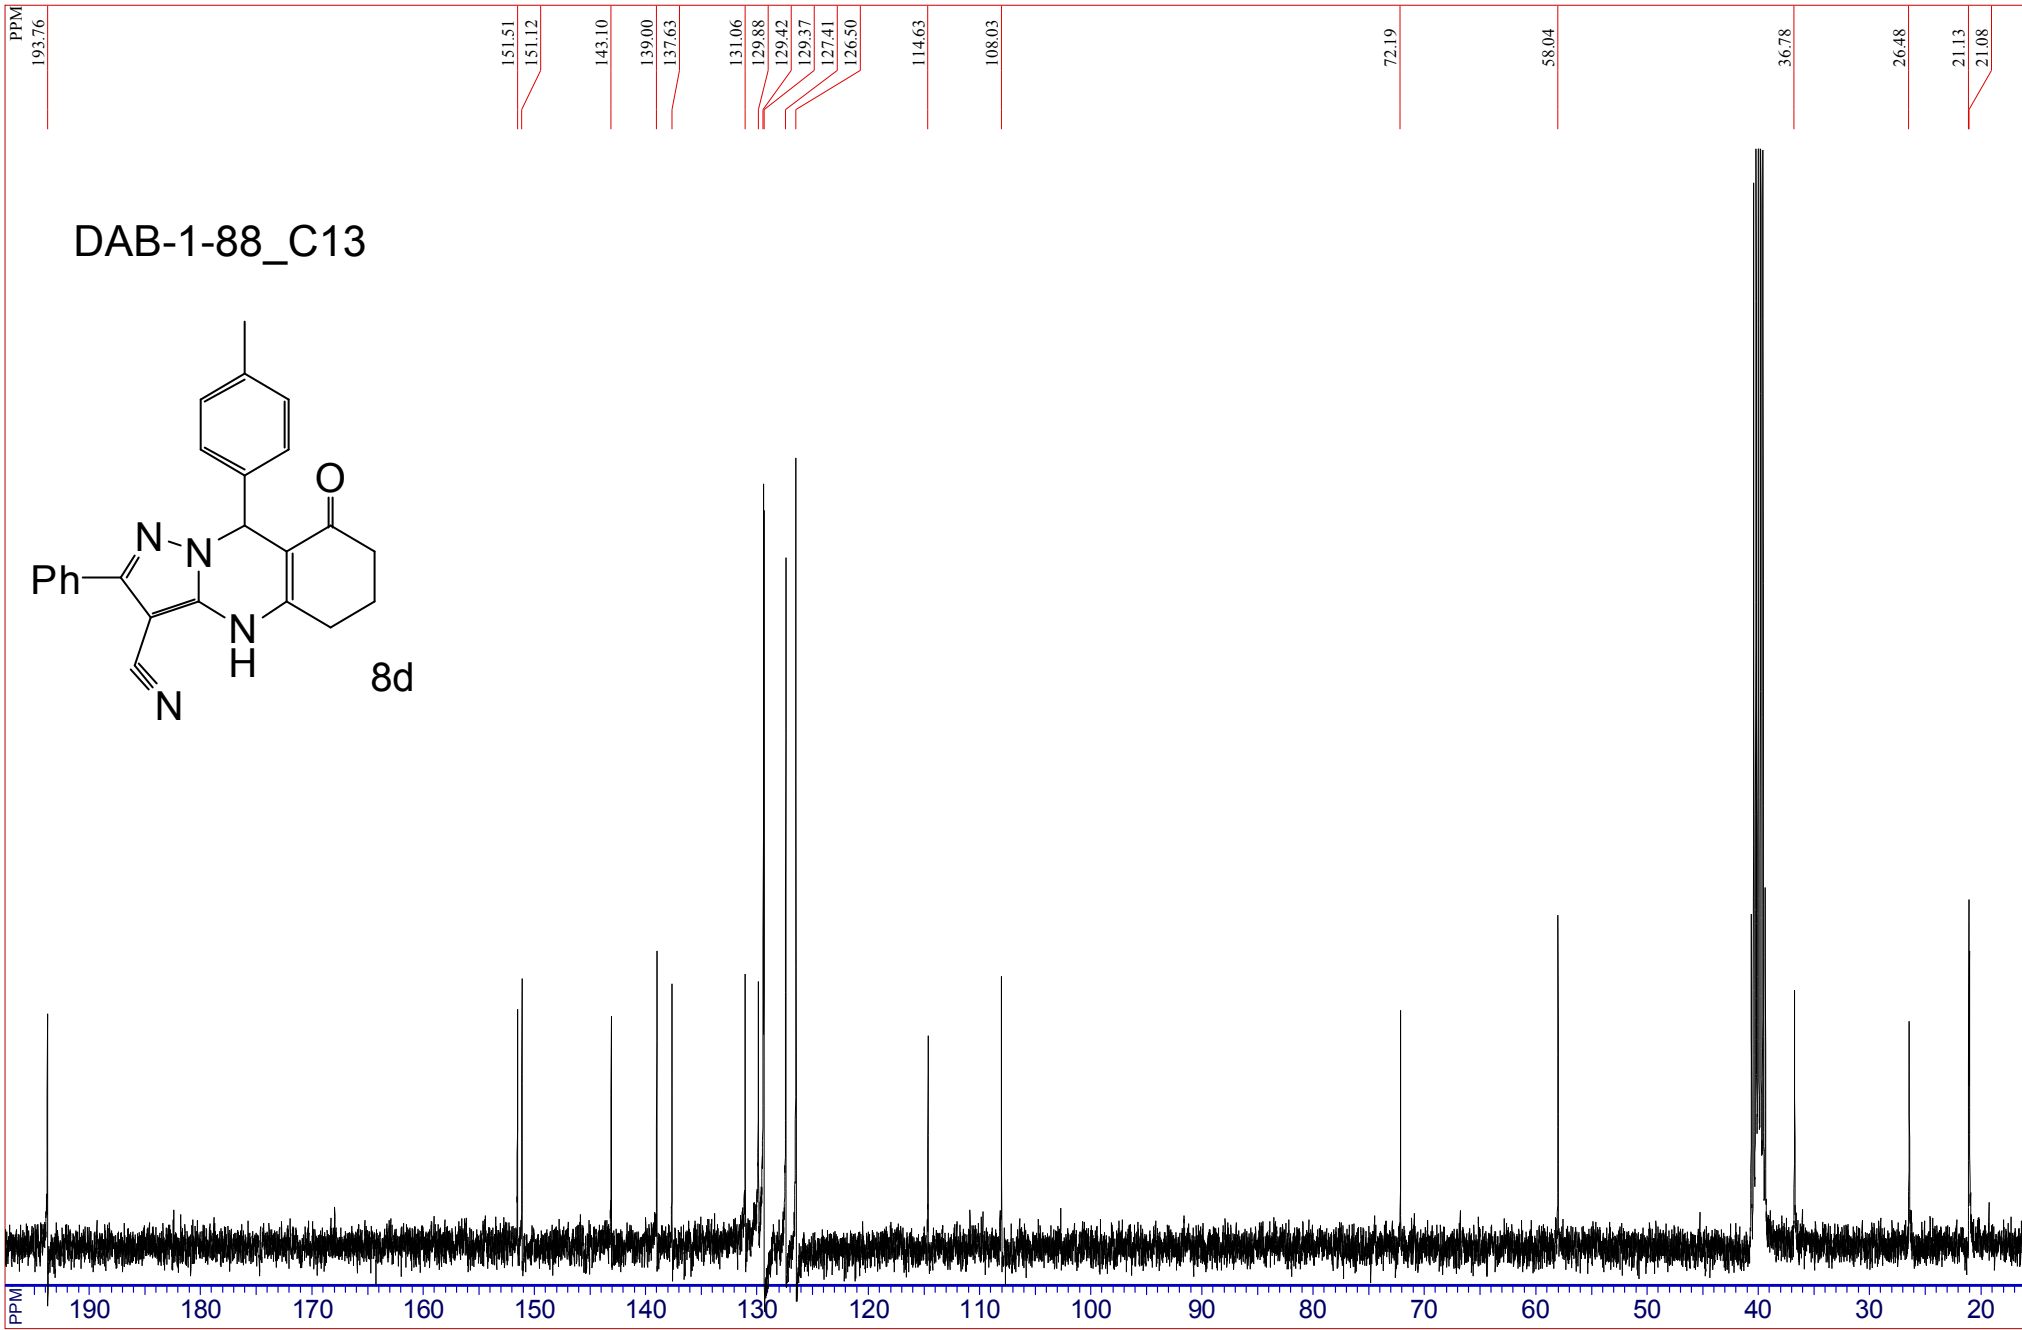

|                         |                  |                  |           |                            |                                     |
|-------------------------|------------------|------------------|-----------|----------------------------|-------------------------------------|
| File name: DAB-1-88_C13 | Operator: USER 1 | SF: 100.6128 MHz | NSC: 197  | PW: 0.00 usec, RG: 2050    | SI: 32768                           |
| Date: 24-Sep-2015       | Solvent: DMSO    | SW: 24038 Hz     | TE: 299 K | AQ: 1.36 sec, RD: 0.00 sec | Parameter file, TOPSPIN Version 2.1 |

PPM  
193.99

152.63  
152.24

143.32  
141.61  
139.63

129.88  
128.97  
128.42  
128.14  
127.32  
126.81

115.66

109.87

73.40

57.70

42.05

36.04

24.69

21.38

20.90

15.23

# DAB-02-104-p1\_C13

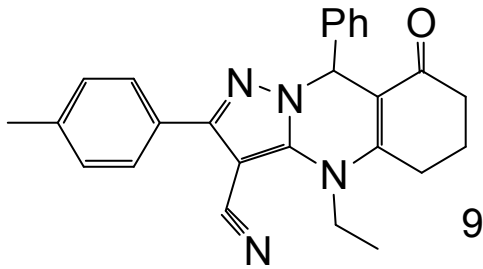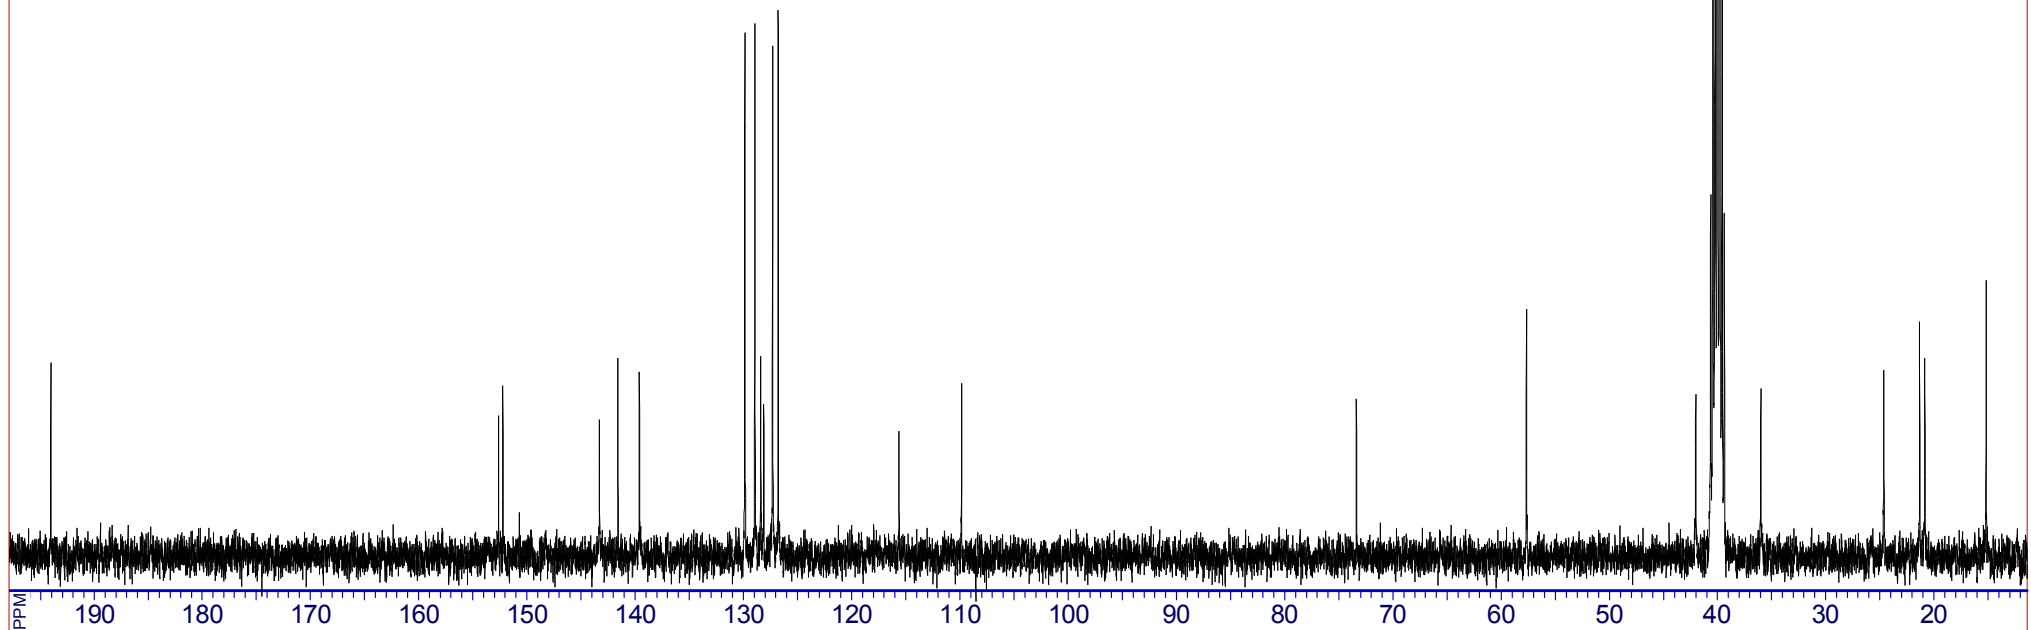

|                              |                  |                  |           |                            |                                     |
|------------------------------|------------------|------------------|-----------|----------------------------|-------------------------------------|
| File name: DAB-02-104-p1_C13 | Operator: USER 1 | SF: 100.6128 MHz | NSC: 323  | PW: 0.00 usec, RG: 2050    | SI: 32768                           |
| Date: 24-Sep-2015            | Solvent: DMSO    | SW: 24038 Hz     | TE: 299 K | AQ: 1.36 sec, RD: 0.00 sec | Parameter file, TOPSPIN Version 2.1 |

# DAB-02-107-p2\_C13

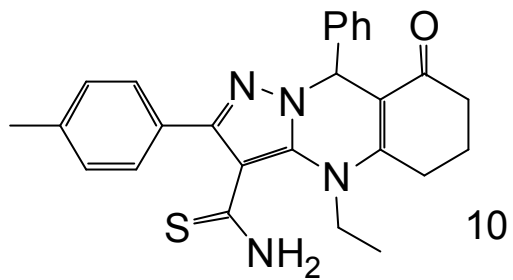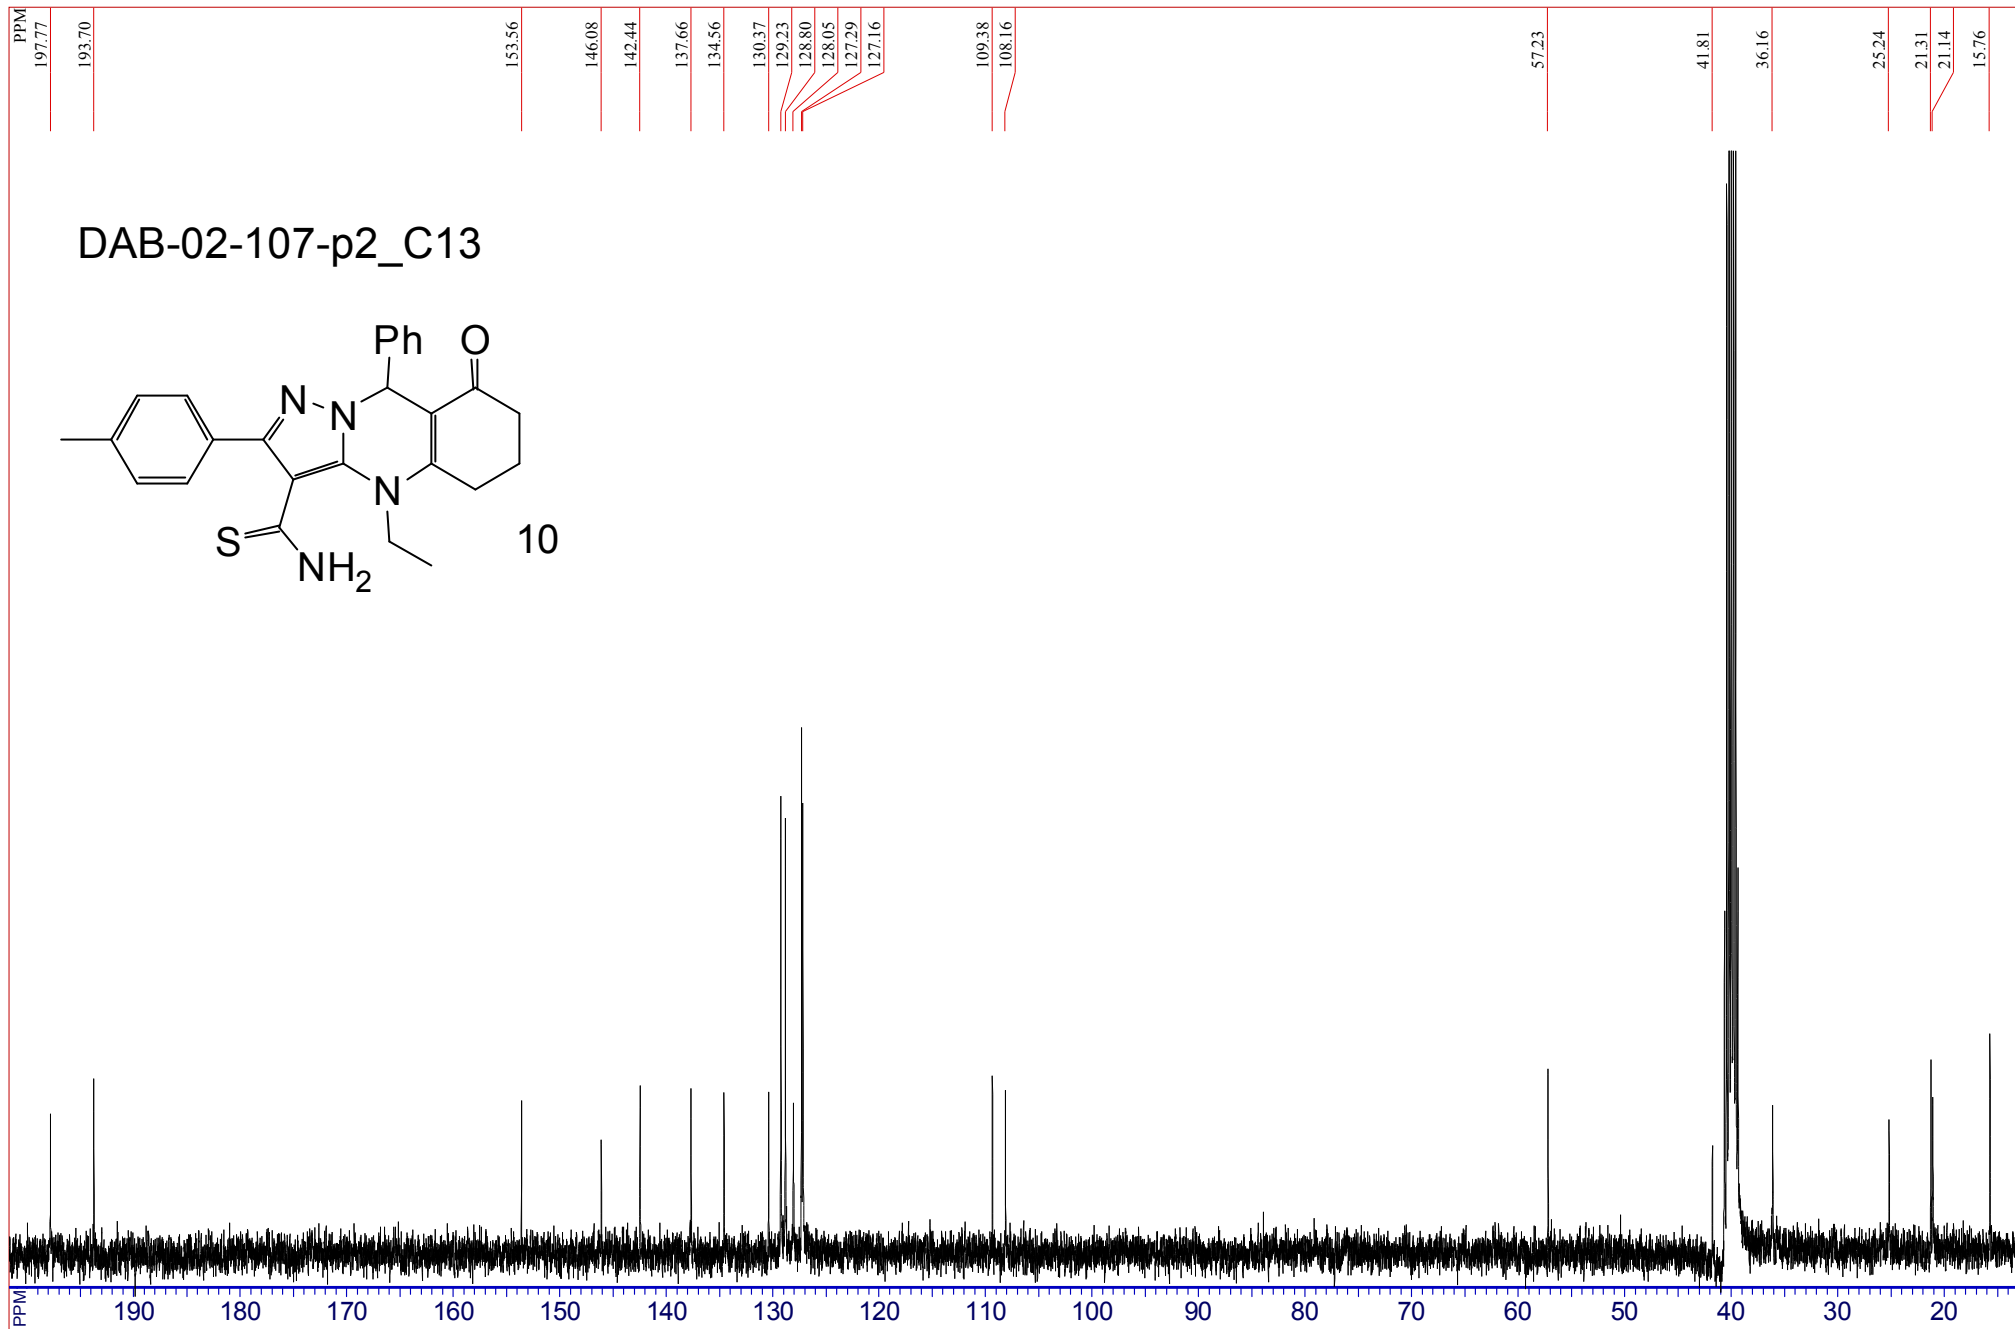

|                              |                  |                  |           |                            |                                     |
|------------------------------|------------------|------------------|-----------|----------------------------|-------------------------------------|
| File name: DAB-02-107-p2_C13 | Operator: USER 1 | SF: 100.6128 MHz | NSC: 315  | PW: 0.00 usec, RG: 2050    | SI: 32768                           |
| Date: 24-Sep-2015            | Solvent: DMSO    | SW: 24038 Hz     | TE: 299 K | AQ: 1.36 sec, RD: 0.00 sec | Parameter file, TOPSPIN Version 2.1 |

#### 4. Mass-spectra of synthesized compounds

Print Date: 26 Mar 2009 18:48:48

Scan 49 from ...\_data\my files\imk\mk-kolosov\dab-1-79-dep\_26.03.2009.xms

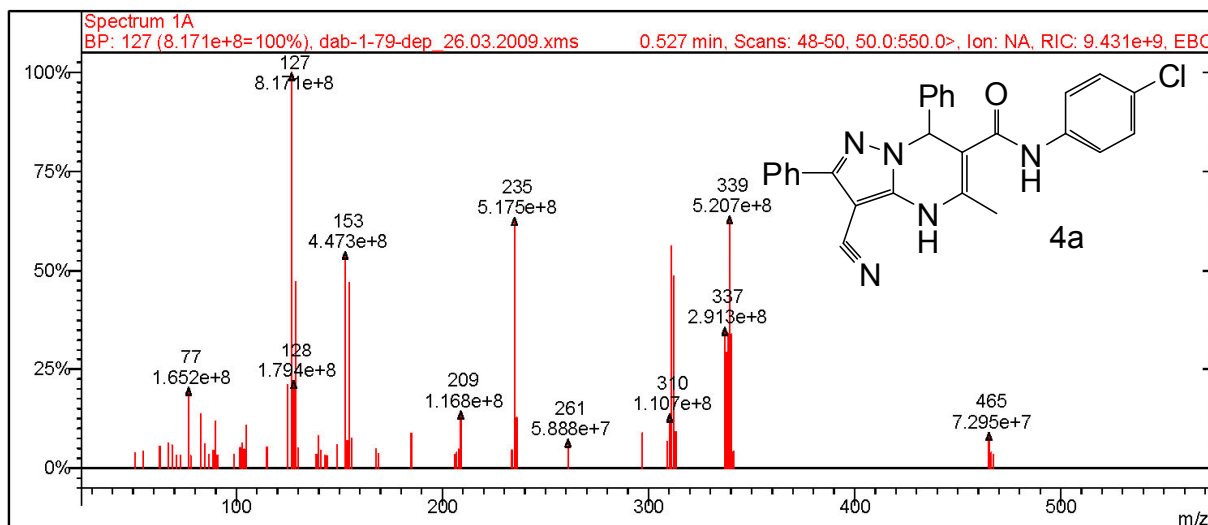

Spectrum from ...iles\imk\mk-kolosov\dab-1-79-dep\_26.03.2009.xms

Scan No: 49, Time: 0.527 minutes

3 points averaged. Background corrected (E).

Comment: 0.527 min. Scans: 48-50 50.0:550.0> Ion: NA RIC: 2.044e+10

Pair Count: 62 MW: 0 Formula: None

CAS No: None Acquired Range: 50 - 550 m/z

Method Description: EI

Scan 1 Channel Description: 50.0:550.0> EI;Det 0;WI Q1 Cal;ST 0.010

Scan Information: cp = 1.0 mTorr

Precursor Mass Range: 50 - 550 m/z

| Ion | Int      | Norm | Ion | Int      | Norm | Ion | Int      | Norm |
|-----|----------|------|-----|----------|------|-----|----------|------|
| 51  | 3.079e+7 | 38   | 125 | 1.706e+8 | 209  | 209 | 1.168e+8 | 143  |
| 55  | 3.474e+7 | 42   | 127 | 8.171e+8 | 999  | 234 | 3.757e+7 | 46   |
| 63  | 4.440e+7 | 54   | 128 | 1.794e+8 | 219  | 235 | 5.175e+8 | 633  |
| 67  | 5.129e+7 | 63   | 129 | 3.851e+8 | 471  | 236 | 1.041e+8 | 127  |
| 69  | 4.658e+7 | 57   | 130 | 4.089e+7 | 50   | 261 | 5.888e+7 | 72   |
| 71  | 2.495e+7 | 31   | 139 | 2.778e+7 | 34   | 297 | 7.172e+7 | 88   |
| 73  | 2.486e+7 | 30   | 140 | 6.507e+7 | 80   | 309 | 5.467e+7 | 67   |
| 77  | 1.652e+8 | 202  | 141 | 3.624e+7 | 44   | 310 | 1.107e+8 | 135  |
| 78  | 2.493e+7 | 30   | 143 | 2.565e+7 | 31   | 311 | 4.586e+8 | 561  |
| 83  | 1.102e+8 | 135  | 144 | 2.518e+7 | 31   | 312 | 3.971e+8 | 485  |
| 85  | 4.901e+7 | 60   | 149 | 4.799e+7 | 59   | 313 | 7.483e+7 | 91   |
| 87  | 2.726e+7 | 33   | 153 | 4.473e+8 | 547  | 337 | 2.913e+8 | 356  |
| 89  | 3.608e+7 | 44   | 154 | 5.633e+7 | 69   | 338 | 2.400e+8 | 293  |
| 90  | 9.638e+7 | 118  | 155 | 3.841e+8 | 470  | 339 | 2.787e+8 | 341  |
| 91  | 2.614e+7 | 32   | 156 | 5.994e+7 | 73   | 339 | 5.207e+8 | 637  |
| 99  | 2.672e+7 | 33   | 168 | 3.967e+7 | 49   | 340 | 2.774e+8 | 339  |
| 102 | 4.166e+7 | 51   | 169 | 2.973e+7 | 36   | 341 | 3.411e+7 | 42   |
| 103 | 5.118e+7 | 63   | 185 | 7.127e+7 | 87   | 465 | 7.295e+7 | 89   |
| 104 | 3.830e+7 | 47   | 206 | 2.768e+7 | 34   | 466 | 3.163e+7 | 39   |
| 105 | 8.671e+7 | 106  | 207 | 3.186e+7 | 39   | 467 | 2.705e+7 | 33   |
| 115 | 4.266e+7 | 52   | 208 | 3.818e+7 | 47   |     |          |      |

Scan 46 from ...data\my files\imk\mk-kolosov\dab-1-140-dep\_31.03.2009.xms

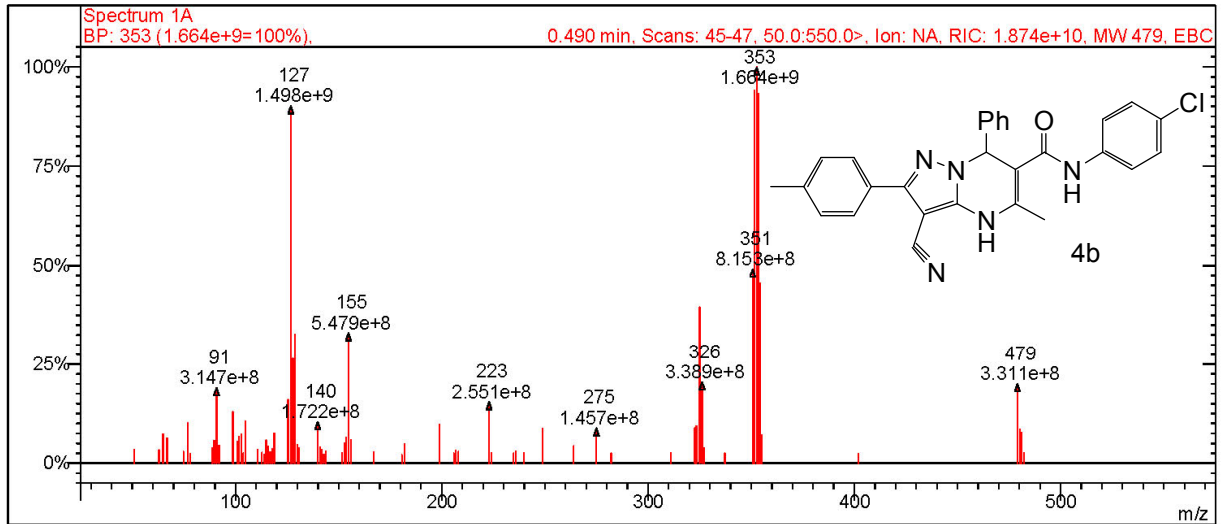

Spectrum from ...les\imk\mk-kolosov\dab-1-140-dep\_31.03.2009.xms

Scan No: 46, Time: 0.490 minutes

3 points averaged. Background corrected (E).

Name: DAB-1-140-DEP

Comment: Varian 1200 L; EI; electron energy 70 eV

Pair Count: 75 MW: 479 Formula: None

CAS No: None Acquired Range: 50 - 550 m/z

Method Description: EI

Scan 1 Channel Description: 50.0:550.0> EI;Det 0;WI Q1 Cal;ST 0.010

Scan Information: cp = 1.0 mTorr

Precursor Mass Range: 50 - 550 m/z

| Ion | Int      | Norm | Ion | Int      | Norm | Ion | Int      | Norm |
|-----|----------|------|-----|----------|------|-----|----------|------|
| 51  | 5.659e+7 | 34   | 126 | 2.654e+8 | 159  | 235 | 4.029e+7 | 24   |
| 63  | 5.466e+7 | 33   | 127 | 1.498e+9 | 900  | 236 | 4.922e+7 | 30   |
| 65  | 1.209e+8 | 73   | 128 | 4.388e+8 | 263  | 240 | 4.158e+7 | 25   |
| 67  | 1.042e+8 | 63   | 129 | 5.420e+8 | 325  | 249 | 1.447e+8 | 87   |
| 75  | 4.724e+7 | 28   | 130 | 7.543e+7 | 45   | 264 | 7.140e+7 | 43   |
| 77  | 1.664e+8 | 100  | 131 | 6.191e+7 | 37   | 275 | 1.457e+8 | 87   |
| 78  | 3.857e+7 | 23   | 140 | 1.722e+8 | 103  | 282 | 4.094e+7 | 25   |
| 89  | 6.392e+7 | 38   | 141 | 6.660e+7 | 40   | 311 | 4.136e+7 | 25   |
| 90  | 9.401e+7 | 56   | 142 | 5.619e+7 | 34   | 323 | 1.480e+8 | 89   |
| 91  | 3.147e+8 | 189  | 143 | 3.609e+7 | 22   | 323 | 1.551e+8 | 93   |
| 92  | 7.324e+7 | 44   | 144 | 4.812e+7 | 29   | 325 | 6.569e+8 | 394  |
| 99  | 2.146e+8 | 129  | 152 | 4.119e+7 | 25   | 326 | 3.389e+8 | 204  |
| 101 | 9.000e+7 | 54   | 153 | 8.232e+7 | 49   | 327 | 6.280e+7 | 38   |
| 102 | 1.115e+8 | 67   | 154 | 1.082e+8 | 65   | 337 | 4.036e+7 | 24   |
| 103 | 1.198e+8 | 72   | 155 | 5.479e+8 | 329  | 351 | 8.153e+8 | 490  |
| 104 | 4.119e+7 | 25   | 156 | 9.641e+7 | 58   | 352 | 1.564e+9 | 939  |
| 105 | 1.759e+8 | 106  | 167 | 4.563e+7 | 27   | 353 | 1.664e+9 | 999  |
| 111 | 5.378e+7 | 32   | 181 | 3.335e+7 | 20   | 353 | 1.551e+9 | 932  |
| 113 | 4.405e+7 | 26   | 182 | 8.039e+7 | 48   | 354 | 7.584e+8 | 455  |
| 114 | 3.428e+7 | 21   | 199 | 1.616e+8 | 97   | 355 | 1.162e+8 | 70   |
| 115 | 9.513e+7 | 57   | 206 | 4.072e+7 | 24   | 402 | 3.974e+7 | 24   |
| 116 | 6.975e+7 | 42   | 207 | 5.237e+7 | 31   | 479 | 3.311e+8 | 199  |
| 117 | 4.659e+7 | 28   | 208 | 4.712e+7 | 28   | 480 | 1.421e+8 | 85   |
| 118 | 5.941e+7 | 36   | 223 | 2.551e+8 | 153  | 481 | 1.283e+8 | 77   |
| 119 | 1.248e+8 | 75   | 224 | 4.096e+7 | 25   | 482 | 4.223e+7 | 25   |

Scan 64 from ...\_data\my files\mk\mk-kolosov\dab-1-86-dep\_26.02.2009.xms

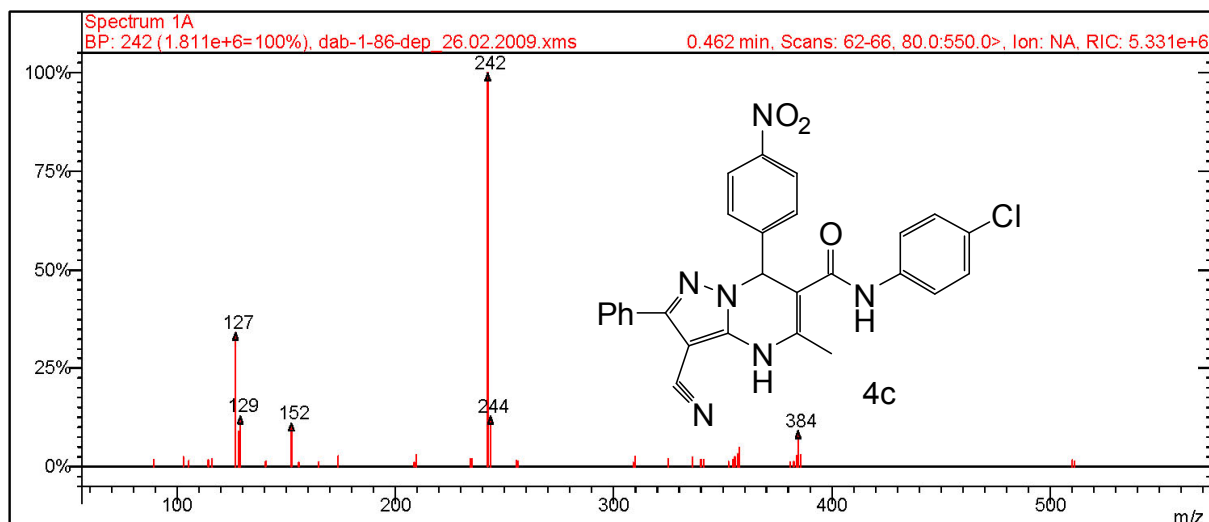

Spectrum from ...iles\mk\mk-kolosov\dab-1-86-dep\_26.02.2009.xms

Scan No: 64, Time: 0.462 minutes

5 points averaged. Not background corrected.

Name: DAB-1-86

Comment: Varian1200L; EI; Electron Energy:70eV

Pair Count: 39 MW: 0 Formula: None

CAS No: None Acquired Range: 80 - 550 m/z

Method Description: EI

Scan 1 Channel Description: 80.0:550.0> EI;Det 0;WI Q1 Cal;ST 0.010

Scan Information: cp = 1.0 mTorr

Precursor Mass Range: 80 - 550 m/z

| Ion | Int    | Norm | Ion | Int      | Norm | Ion | Int    | Norm |
|-----|--------|------|-----|----------|------|-----|--------|------|
| 89  | 29790  | 16   | 209 | 19450    | 11   | 341 | 29180  | 16   |
| 103 | 45475  | 25   | 210 | 52525    | 29   | 353 | 21790  | 12   |
| 105 | 25315  | 14   | 234 | 36095    | 20   | 354 | 31450  | 17   |
| 114 | 29450  | 16   | 235 | 36040    | 20   | 356 | 44870  | 25   |
| 116 | 36060  | 20   | 242 | 1.811e+6 | 999  | 357 | 57395  | 32   |
| 127 | 618525 | 341  | 244 | 229915   | 127  | 358 | 87380  | 48   |
| 128 | 160045 | 88   | 255 | 27410    | 15   | 381 | 19465  | 11   |
| 129 | 230265 | 127  | 256 | 23790    | 13   | 383 | 22055  | 12   |
| 141 | 23550  | 13   | 309 | 18860    | 10   | 384 | 49520  | 27   |
| 152 | 197930 | 109  | 310 | 46000    | 25   | 384 | 162580 | 90   |
| 156 | 18245  | 10   | 325 | 35715    | 20   | 386 | 54655  | 30   |
| 165 | 21170  | 12   | 336 | 41975    | 23   | 510 | 30710  | 17   |
| 174 | 47325  | 26   | 340 | 31610    | 17   | 511 | 23380  | 13   |



Scan 68 from ...\_data\my files\imk\mk-kolosov\dab-1-87-dep\_05.02.2009.xms

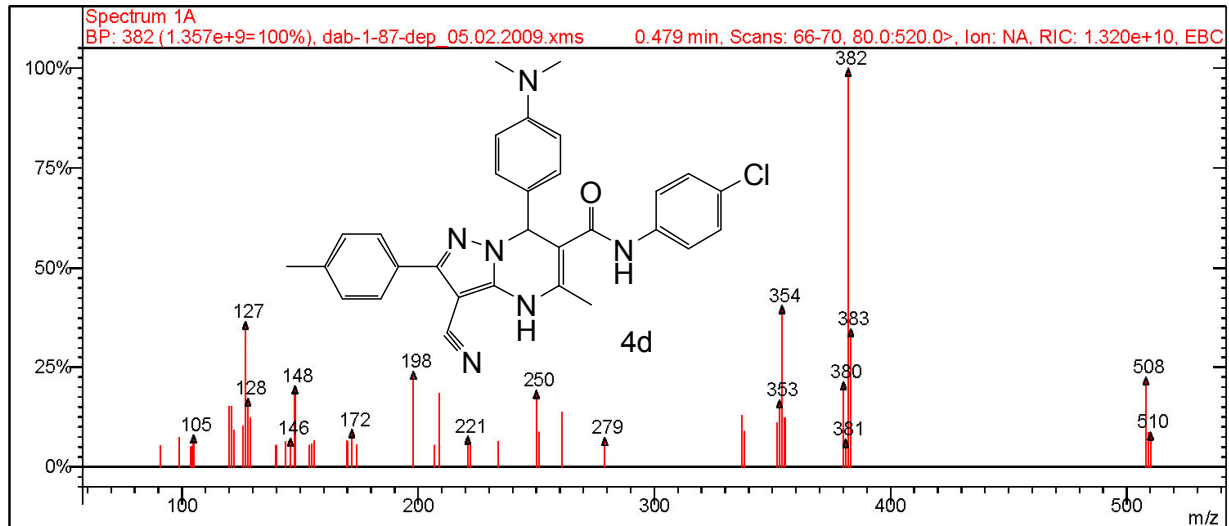

Spectrum from ...iles\imk\mk-kolosov\dab-1-87-dep\_05.02.2009.xms

Scan No: 68, Time: 0.479 minutes

5 points averaged. Background corrected (E).

Comment: 0.479 min. Scans: 66-70 80.0:520.0> Ion: NA RIC: 1.611e+10

Pair Count: 44 MW: 0 Formula: None

CAS No: None Acquired Range: 80 - 520 m/z

Method Description: EI

Scan 1 Channel Description: 80.0:520.0> EI;Det 0;WI Q1 Cal;ST 0.010

Scan Information: cp = 1.0 mTorr

Precursor Mass Range: 80 - 520 m/z

| Ion | Int      | Norm | Ion | Int      | Norm | Ion | Int      | Norm |
|-----|----------|------|-----|----------|------|-----|----------|------|
| 91  | 7.100e+7 | 52   | 154 | 7.222e+7 | 53   | 279 | 9.818e+7 | 72   |
| 99  | 9.896e+7 | 73   | 155 | 7.692e+7 | 57   | 337 | 1.721e+8 | 127  |
| 104 | 6.814e+7 | 50   | 156 | 8.677e+7 | 64   | 338 | 1.188e+8 | 87   |
| 105 | 1.071e+8 | 79   | 170 | 8.761e+7 | 65   | 352 | 1.473e+8 | 108  |
| 120 | 2.045e+8 | 151  | 172 | 1.249e+8 | 92   | 353 | 2.256e+8 | 166  |
| 121 | 2.045e+8 | 151  | 174 | 7.350e+7 | 54   | 354 | 5.497e+8 | 405  |
| 122 | 1.218e+8 | 90   | 198 | 3.234e+8 | 238  | 355 | 1.655e+8 | 122  |
| 126 | 1.372e+8 | 101  | 207 | 7.217e+7 | 53   | 380 | 2.879e+8 | 212  |
| 127 | 4.955e+8 | 365  | 209 | 2.489e+8 | 183  | 381 | 9.228e+7 | 68   |
| 128 | 2.315e+8 | 170  | 221 | 1.022e+8 | 75   | 382 | 1.357e+9 | 999  |
| 129 | 1.659e+8 | 122  | 222 | 7.386e+7 | 54   | 383 | 4.713e+8 | 347  |
| 140 | 7.160e+7 | 53   | 234 | 8.457e+7 | 62   | 508 | 3.037e+8 | 224  |
| 144 | 8.504e+7 | 63   | 250 | 2.585e+8 | 190  | 509 | 1.138e+8 | 84   |
| 146 | 9.579e+7 | 71   | 251 | 1.161e+8 | 85   | 510 | 1.170e+8 | 86   |
| 148 | 2.742e+8 | 202  | 261 | 1.848e+8 | 136  |     |          |      |

Scan 44 from ...ta\my files\imk\mk-kolosov\dab-1-137pk-dep\_05.02.2009.xms

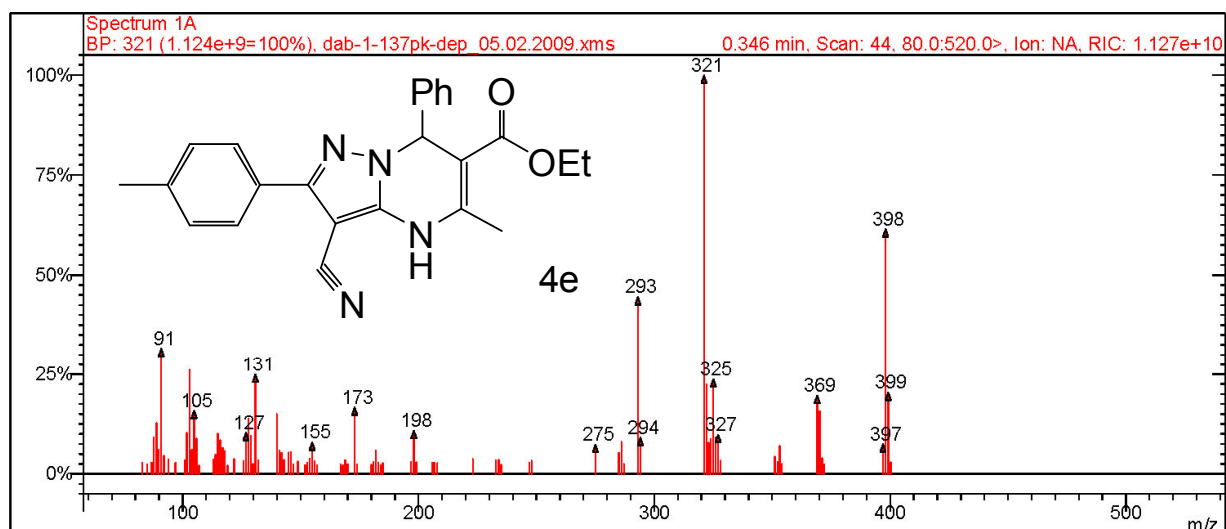

Spectrum from ...s\imk\mk-kolosov\dab-1-137pk-dep\_05.02.2009.xms

Scan No: 44, Time: 0.346 minutes

No averaging. Not background corrected.

Name: DAB-1-137pK

Comment: 0.346 min. Scan: 44 80.0:520.0> Ion: NA RIC: 1.127e+10

Pair Count: 96 MW: 0 Formula: None

CAS No: None Acquired Range: 80 - 520 m/z

Method Description: EI

Scan 1 Channel Description: 80.0:520.0> EI;Det 0;WI Q1 Cal;ST 0.010

Scan Information: cp = 1.0 mTorr

Precursor Mass Range: 80 - 520 m/z

| Ion | Int      | Norm | Ion | Int      | Norm | Ion | Int      | Norm |
|-----|----------|------|-----|----------|------|-----|----------|------|
| 83  | 3.113e+7 | 28   | 140 | 1.677e+8 | 149  | 223 | 4.097e+7 | 36   |
| 85  | 2.646e+7 | 24   | 141 | 6.595e+7 | 59   | 233 | 3.797e+7 | 34   |
| 87  | 3.142e+7 | 28   | 142 | 5.891e+7 | 52   | 234 | 3.982e+7 | 35   |
| 88  | 1.021e+8 | 91   | 143 | 3.891e+7 | 35   | 235 | 2.531e+7 | 22   |
| 89  | 1.425e+8 | 127  | 145 | 5.942e+7 | 53   | 247 | 3.090e+7 | 27   |
| 90  | 6.655e+7 | 59   | 146 | 6.165e+7 | 55   | 248 | 3.653e+7 | 32   |
| 91  | 3.537e+8 | 314  | 147 | 2.524e+7 | 22   | 275 | 8.140e+7 | 72   |
| 92  | 5.091e+7 | 45   | 149 | 3.454e+7 | 31   | 285 | 5.849e+7 | 52   |
| 94  | 3.885e+7 | 35   | 152 | 2.446e+7 | 22   | 286 | 8.955e+7 | 80   |
| 97  | 3.093e+7 | 27   | 153 | 3.136e+7 | 28   | 287 | 2.749e+7 | 24   |
| 101 | 3.772e+7 | 34   | 154 | 4.178e+7 | 37   | 293 | 4.994e+8 | 444  |
| 102 | 1.147e+8 | 102  | 155 | 8.795e+7 | 78   | 294 | 1.014e+8 | 90   |
| 103 | 2.933e+8 | 261  | 156 | 3.590e+7 | 32   | 321 | 1.124e+9 | 999  |
| 104 | 6.740e+7 | 60   | 157 | 2.479e+7 | 22   | 322 | 2.507e+8 | 223  |
| 105 | 1.771e+8 | 157  | 167 | 2.569e+7 | 23   | 323 | 8.712e+7 | 77   |
| 106 | 9.864e+7 | 88   | 168 | 2.383e+7 | 21   | 324 | 9.638e+7 | 86   |
| 107 | 2.295e+7 | 20   | 169 | 3.847e+7 | 34   | 325 | 2.660e+8 | 236  |
| 113 | 3.945e+7 | 35   | 170 | 2.654e+7 | 24   | 326 | 1.028e+8 | 91   |
| 114 | 5.383e+7 | 48   | 173 | 1.865e+8 | 166  | 327 | 1.096e+8 | 97   |
| 115 | 1.122e+8 | 100  | 174 | 2.640e+7 | 23   | 328 | 3.636e+7 | 32   |
| 116 | 9.492e+7 | 84   | 180 | 2.550e+7 | 23   | 351 | 4.821e+7 | 43   |
| 117 | 7.248e+7 | 64   | 181 | 3.354e+7 | 30   | 352 | 3.355e+7 | 30   |
| 118 | 6.425e+7 | 57   | 182 | 6.544e+7 | 58   | 353 | 7.833e+7 | 70   |
| 119 | 2.316e+7 | 21   | 183 | 2.998e+7 | 27   | 354 | 2.756e+7 | 24   |
| 122 | 4.098e+7 | 36   | 184 | 2.442e+7 | 22   | 369 | 2.195e+8 | 195  |
| 126 | 3.496e+7 | 31   | 185 | 3.014e+7 | 27   | 370 | 1.763e+8 | 157  |
| 127 | 1.148e+8 | 102  | 197 | 3.384e+7 | 30   | 371 | 4.396e+7 | 39   |
| 128 | 1.549e+8 | 138  | 198 | 1.209e+8 | 108  | 372 | 2.671e+7 | 24   |
| 129 | 1.070e+8 | 95   | 199 | 3.249e+7 | 29   | 397 | 8.255e+7 | 73   |
| 130 | 2.795e+7 | 25   | 206 | 3.138e+7 | 28   | 398 | 6.898e+8 | 613  |
| 131 | 2.792e+8 | 248  | 207 | 3.150e+7 | 28   | 399 | 2.283e+8 | 203  |
| 132 | 3.658e+7 | 33   | 208 | 2.938e+7 | 26   | 400 | 3.262e+7 | 29   |

Scan 43 from ...n\_data\mk-kolosov\dab\07\dab-1-188-dep\_30.07.2009.xms

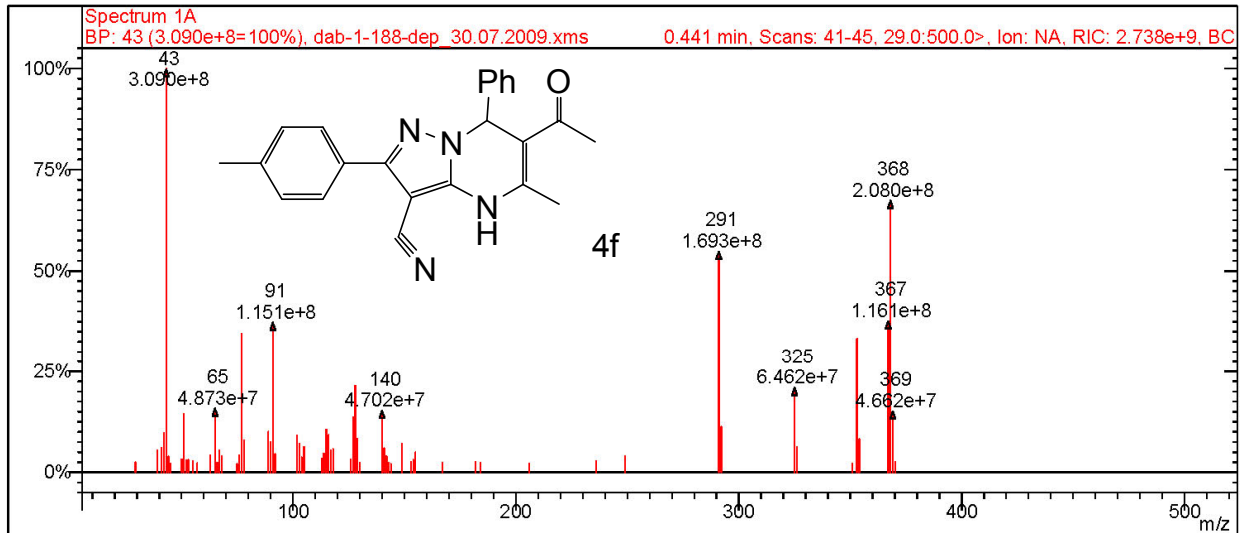

Spectrum from ...mk-kolosov\dab\07\dab-1-188-dep\_30.07.2009.xms

Scan No: 43, Time: 0.441 minutes

5 points averaged. Background corrected.

Name: DAB-1-188-DEP

Comment: Varian 1200 L; EI; electron energy 70 eV

Pair Count: 67 MW: 0 Formula: None

CAS No: None Acquired Range: 29 - 500 m/z

Method Description: EI

Scan 1 Channel Description: 29.0:500.0> EI;Det 0;WI Q1 Cal;ST 0.010

Scan Information: cp = 1.0 mTorr

Precursor Mass Range: 29 - 500 m/z

| Ion | Int      | Norm | Ion | Int      | Norm | Ion | Int      | Norm |
|-----|----------|------|-----|----------|------|-----|----------|------|
| 29  | 7.651e+6 | 25   | 90  | 2.276e+7 | 74   | 144 | 6.370e+6 | 21   |
| 39  | 1.683e+7 | 54   | 91  | 1.151e+8 | 372  | 149 | 2.173e+7 | 70   |
| 41  | 1.869e+7 | 60   | 92  | 1.408e+7 | 46   | 153 | 7.516e+6 | 24   |
| 42  | 2.969e+7 | 96   | 102 | 2.828e+7 | 91   | 154 | 9.510e+6 | 31   |
| 43  | 3.090e+8 | 999  | 103 | 2.139e+7 | 69   | 155 | 1.532e+7 | 50   |
| 44  | 1.206e+7 | 39   | 104 | 1.145e+7 | 37   | 167 | 7.234e+6 | 23   |
| 45  | 6.450e+6 | 21   | 105 | 1.946e+7 | 63   | 182 | 8.038e+6 | 26   |
| 50  | 9.901e+6 | 32   | 113 | 1.050e+7 | 34   | 184 | 7.247e+6 | 23   |
| 51  | 4.429e+7 | 143  | 114 | 1.431e+7 | 46   | 206 | 6.189e+6 | 20   |
| 52  | 9.183e+6 | 30   | 115 | 3.273e+7 | 106  | 236 | 8.716e+6 | 28   |
| 53  | 9.430e+6 | 30   | 116 | 2.841e+7 | 92   | 249 | 1.203e+7 | 39   |
| 55  | 8.123e+6 | 26   | 117 | 1.661e+7 | 54   | 291 | 1.693e+8 | 547  |
| 57  | 6.883e+6 | 22   | 118 | 1.763e+7 | 57   | 292 | 3.491e+7 | 113  |
| 63  | 1.302e+7 | 42   | 126 | 9.753e+6 | 32   | 325 | 6.462e+7 | 209  |
| 65  | 4.873e+7 | 158  | 127 | 4.187e+7 | 135  | 326 | 1.918e+7 | 62   |
| 66  | 7.266e+6 | 23   | 128 | 6.624e+7 | 214  | 351 | 6.559e+6 | 21   |
| 67  | 1.644e+7 | 53   | 129 | 2.570e+7 | 83   | 353 | 1.027e+8 | 332  |
| 68  | 1.221e+7 | 39   | 130 | 7.354e+6 | 24   | 354 | 2.519e+7 | 81   |
| 75  | 6.230e+6 | 20   | 140 | 4.702e+7 | 152  | 367 | 1.161e+8 | 376  |
| 76  | 1.279e+7 | 41   | 141 | 1.831e+7 | 59   | 368 | 2.080e+8 | 672  |
| 77  | 1.065e+8 | 344  | 142 | 1.236e+7 | 40   | 369 | 4.662e+7 | 151  |
| 78  | 2.441e+7 | 79   | 143 | 7.148e+6 | 23   | 370 | 7.688e+6 | 25   |
| 89  | 3.095e+7 | 100  |     |          |      |     |          |      |

Scan 135 from ...золе доценко\2015\вещества\5\dab-01-81-dep\_15.05.2012.xms

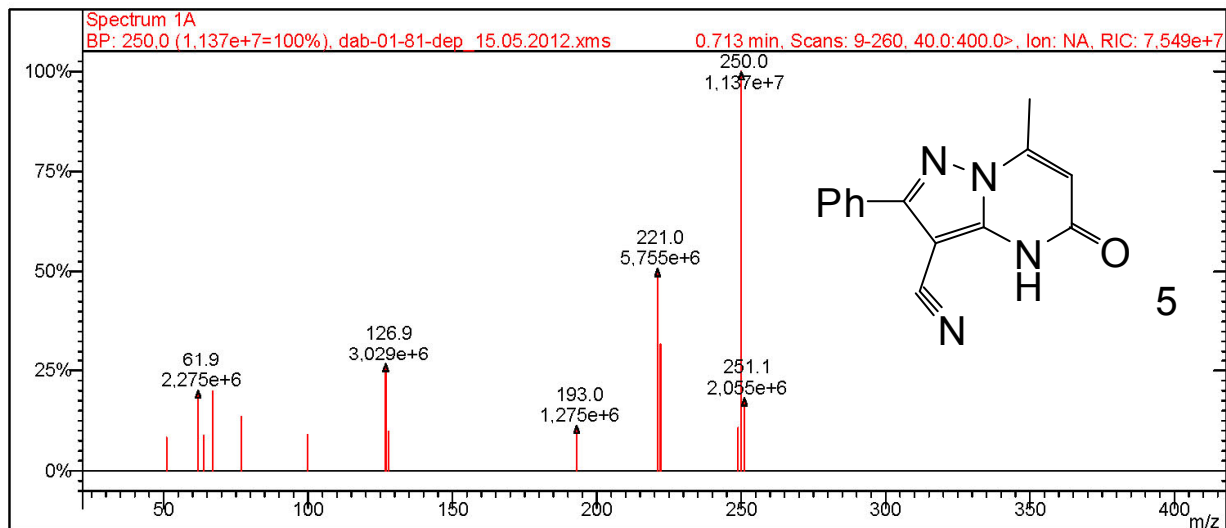

Spectrum from ...ко\2015\вещества\5\dab-01-81-dep\_15.05.2012.xms  
 Scan No: 135, Time: 0.713 minutes  
 252 points averaged. Not background corrected.  
 Comment: 0.713 min. Scans: 9-260 40.0:400.0> Ion: NA RIC: 7,549e+7  
 Pair Count: 14 MW: 0 Formula: None  
 CAS No: None Acquired Range: 40.0 - 400.0 m/z

Method Description: EI

Scan 1 Channel Description: 40.0:400.0> EI;Det 1600;WI Q1 Cal;ST 0.010

Scan Information: cp = 1.0 mTorr

Precursor Mass Range: 40.0 - 400.0 m/z

| Ion  | Int      | Norm | Ion   | Int      | Norm | Ion   | Int      | Norm |
|------|----------|------|-------|----------|------|-------|----------|------|
| 51.0 | 939670   | 83   | 99.9  | 1,022e+6 | 90   | 222.1 | 3,611e+6 | 317  |
| 61.9 | 2,275e+6 | 200  | 126.9 | 3,029e+6 | 266  | 248.9 | 1,217e+6 | 107  |
| 63.9 | 990337   | 87   | 127.9 | 1,107e+6 | 97   | 250.0 | 1,137e+7 | 999  |
| 66.9 | 2,240e+6 | 197  | 193.0 | 1,275e+6 | 112  | 251.1 | 2,055e+6 | 181  |
| 76.9 | 1,527e+6 | 134  | 221.0 | 5,755e+6 | 506  |       |          |      |

Scan 339 from ...золе доценко\2015\вещества\6\dab-1-149-dep\_20.02.2009.xms

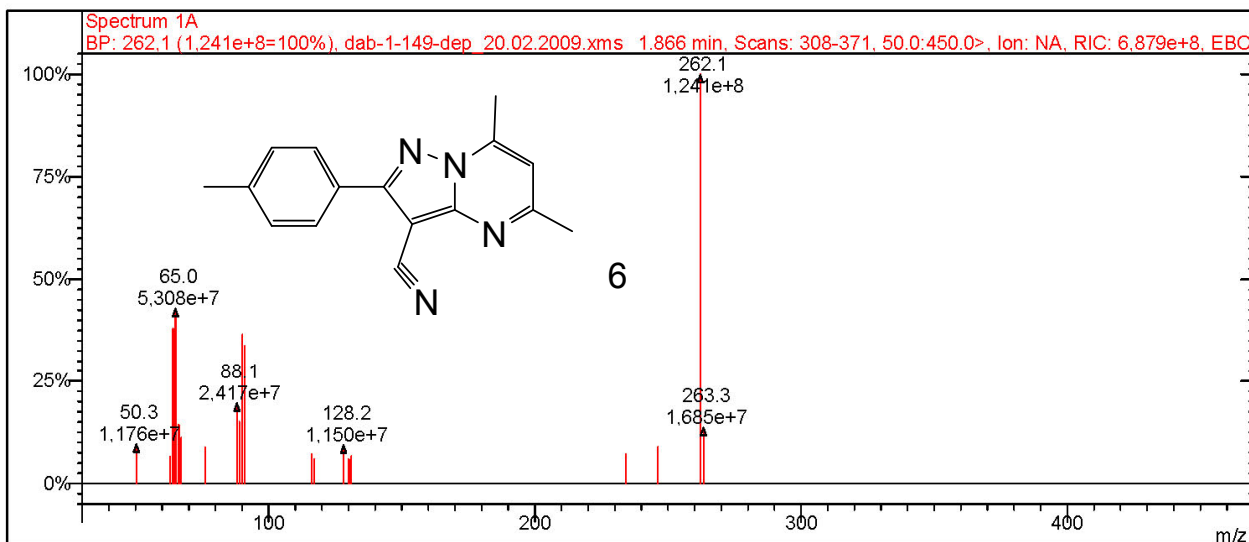

Spectrum from ...ко\2015\вещества\6\dab-1-149-dep\_20.02.2009.xms

Scan No: 339, Time: 1.866 minutes

64 points averaged. Background corrected (E).

Comment: 1.866 min. Scans: 308-371 50.0:450.0> Ion: NA RIC: 1,985e+9

Pair Count: 20 MW: 0 Formula: None

CAS No: None Acquired Range: 50.0 - 450.0 m/z

Method Description: EI

Scan 1 Channel Description: 50.0:450.0> EI;Det 0;WI Q1 Cal;ST 0.010

Scan Information: cp = 1.0 mTorr

Precursor Mass Range: 50.0 - 450.0 m/z

| Ion  | Int      | Norm | Ion   | Int      | Norm | Ion   | Int      | Norm |
|------|----------|------|-------|----------|------|-------|----------|------|
| 50.3 | 1,176e+7 | 95   | 88.1  | 2,417e+7 | 195  | 130.1 | 7,298e+6 | 59   |
| 63.0 | 8,072e+6 | 65   | 89.0  | 1,863e+7 | 150  | 131.0 | 8,179e+6 | 66   |
| 64.1 | 4,710e+7 | 379  | 90.1  | 4,529e+7 | 365  | 234.3 | 8,855e+6 | 71   |
| 65.0 | 5,308e+7 | 427  | 91.0  | 4,188e+7 | 337  | 246.2 | 1,102e+7 | 89   |
| 66.2 | 1,774e+7 | 143  | 116.1 | 8,834e+6 | 71   | 262.1 | 1,241e+8 | 999  |
| 67.1 | 1,376e+7 | 111  | 117.2 | 7,306e+6 | 59   | 263.3 | 1,685e+7 | 136  |
| 76.1 | 1,088e+7 | 88   | 128.2 | 1,150e+7 | 93   |       |          |      |

Scan 68 from ...е доценко\2015\вещества\8a\dab-1-136pk-dep\_05.02.2009.xms

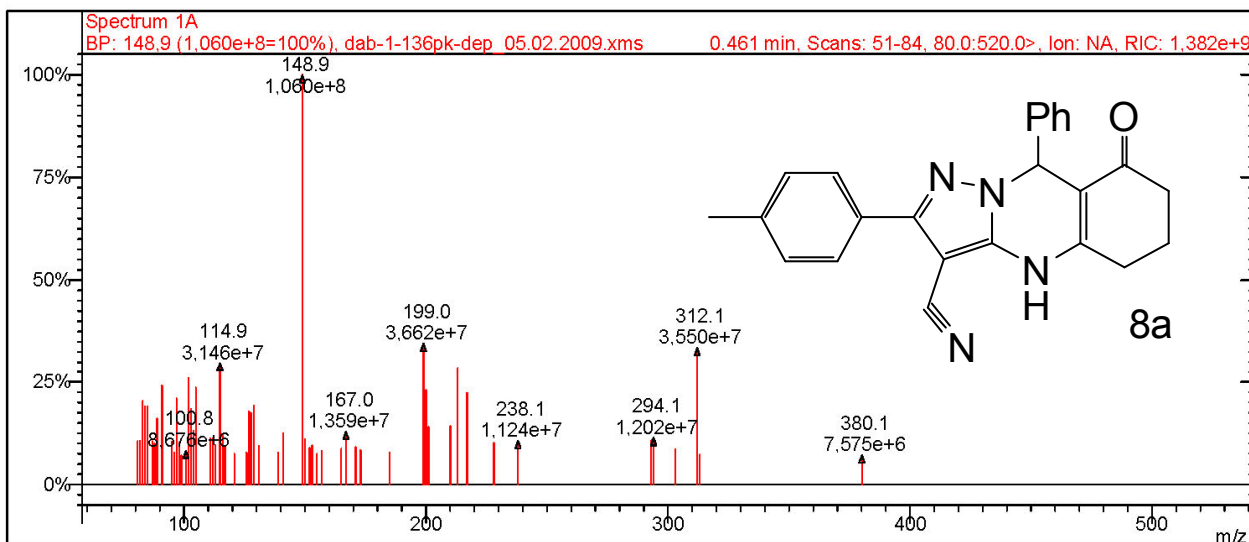

Spectrum from ...2015\вещества\8a\dab-1-136pk-dep\_05.02.2009.xms

Scan No: 68, Time: 0.461 minutes

34 points averaged. Not background corrected.

Comment: 0.461 min. Scans: 51-84 80.0:520.0> Ion: NA RIC: 1,382e+9

Pair Count: 58 MW: 0 Formula: None

CAS No: None Acquired Range: 80.0 - 520.0 m/z

Method Description: EI

Scan 1 Channel Description: 80.0:520.0> EI;Det 0;WI Q1 Cal;ST 0.010

Scan Information: cp = 1.0 mTorr

Precursor Mass Range: 80.0 - 520.0 m/z

| Ion   | Int      | Norm | Ion   | Int      | Norm | Ion   | Int      | Norm |
|-------|----------|------|-------|----------|------|-------|----------|------|
| 80.9  | 1,116e+7 | 105  | 111.9 | 1,194e+7 | 113  | 165.0 | 9,175e+6 | 86   |
| 81.9  | 1,120e+7 | 106  | 113.0 | 1,017e+7 | 96   | 167.0 | 1,359e+7 | 128  |
| 82.9  | 2,156e+7 | 203  | 114.9 | 3,146e+7 | 297  | 171.0 | 9,653e+6 | 91   |
| 83.9  | 2,013e+7 | 190  | 116.0 | 1,275e+7 | 120  | 173.0 | 8,862e+6 | 84   |
| 85.0  | 2,010e+7 | 189  | 117.0 | 9,994e+6 | 94   | 185.0 | 8,113e+6 | 76   |
| 86.9  | 1,112e+7 | 105  | 120.9 | 7,842e+6 | 74   | 199.0 | 3,662e+7 | 345  |
| 87.9  | 1,051e+7 | 99   | 125.9 | 8,182e+6 | 77   | 200.0 | 2,433e+7 | 229  |
| 88.9  | 1,694e+7 | 160  | 126.9 | 1,879e+7 | 177  | 201.1 | 1,477e+7 | 139  |
| 90.9  | 2,556e+7 | 241  | 127.9 | 1,838e+7 | 173  | 210.0 | 1,507e+7 | 142  |
| 94.9  | 1,092e+7 | 103  | 128.9 | 2,021e+7 | 191  | 213.0 | 2,995e+7 | 282  |
| 95.9  | 8,131e+6 | 77   | 130.9 | 9,927e+6 | 94   | 217.0 | 2,365e+7 | 223  |
| 96.9  | 2,216e+7 | 209  | 139.0 | 8,079e+6 | 76   | 228.1 | 1,072e+7 | 101  |
| 98.0  | 1,075e+7 | 101  | 140.9 | 1,319e+7 | 124  | 238.1 | 1,124e+7 | 106  |
| 99.0  | 7,421e+6 | 70   | 148.9 | 1,060e+8 | 999  | 293.1 | 1,131e+7 | 107  |
| 100.8 | 8,676e+6 | 82   | 150.0 | 1,164e+7 | 110  | 294.1 | 1,202e+7 | 113  |
| 101.9 | 2,747e+7 | 259  | 151.9 | 9,395e+6 | 89   | 303.1 | 8,973e+6 | 85   |
| 102.9 | 1,953e+7 | 184  | 153.0 | 1,011e+7 | 95   | 312.1 | 3,550e+7 | 335  |
| 103.9 | 1,383e+7 | 130  | 155.0 | 7,856e+6 | 74   | 313.2 | 7,652e+6 | 72   |
| 104.9 | 2,500e+7 | 236  | 156.9 | 8,619e+6 | 81   | 380.1 | 7,575e+6 | 71   |
| 110.9 | 1,177e+7 | 111  |       |          |      |       |          |      |

Scan 92 from ...оле доценко\2015\вещества\8b\dab-1-144-dep\_20.02.2009.xms

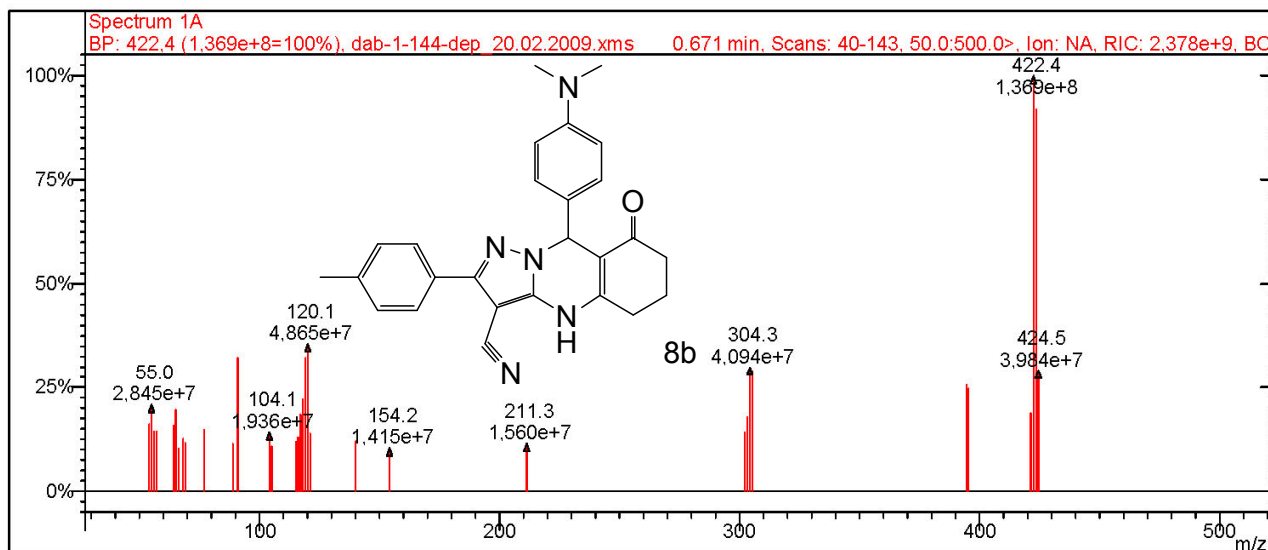

Spectrum from ...o\2015\вещества\8b\dab-1-144-dep\_20.02.2009.xms

Scan No: 92, Time: 0.671 minutes

104 points averaged. Background corrected.

Comment: 0.671 min. Scans: 40-143 50.0:500.0> Ion: NA RIC: 2,538e+9

Pair Count: 34 MW: 0 Formula: None

CAS No: None Acquired Range: 50.0 - 500.0 m/z

Method Description: EI

Scan 1 Channel Description: 50.0:500.0> EI;Det 0;WI Q1 Cal;ST 0.010

Scan Information: cp = 1.0 mTorr

Precursor Mass Range: 50.0 - 500.0 m/z

| Ion  | Int      | Norm | Ion   | Int      | Norm | Ion   | Int      | Norm |
|------|----------|------|-------|----------|------|-------|----------|------|
| 54.1 | 2,189e+7 | 160  | 104.1 | 1,936e+7 | 141  | 211.3 | 1,560e+7 | 114  |
| 55.0 | 2,845e+7 | 208  | 105.2 | 1,467e+7 | 107  | 302.3 | 1,932e+7 | 141  |
| 56.2 | 1,963e+7 | 143  | 115.1 | 1,618e+7 | 118  | 303.2 | 2,433e+7 | 178  |
| 57.1 | 1,949e+7 | 142  | 116.1 | 1,765e+7 | 129  | 304.3 | 4,094e+7 | 299  |
| 64.2 | 2,148e+7 | 157  | 117.1 | 2,513e+7 | 183  | 305.2 | 3,975e+7 | 290  |
| 65.1 | 2,671e+7 | 195  | 118.1 | 3,008e+7 | 219  | 394.6 | 3,503e+7 | 256  |
| 66.2 | 1,390e+7 | 101  | 119.2 | 4,407e+7 | 322  | 395.4 | 3,378e+7 | 246  |
| 68.2 | 1,713e+7 | 125  | 120.1 | 4,865e+7 | 355  | 421.3 | 2,558e+7 | 187  |
| 69.1 | 1,581e+7 | 115  | 121.2 | 1,883e+7 | 137  | 422.4 | 1,369e+8 | 999  |
| 77.0 | 1,998e+7 | 146  | 140.0 | 1,633e+7 | 119  | 423.5 | 1,257e+8 | 917  |
| 88.9 | 1,545e+7 | 113  | 154.2 | 1,415e+7 | 103  | 424.5 | 3,984e+7 | 291  |
| 91.0 | 4,415e+7 | 322  |       |          |      |       |          |      |

Scan 117 from ...оле доценко\2015\вещества\8c\dab-1-143-dep\_20.02.2009.xms

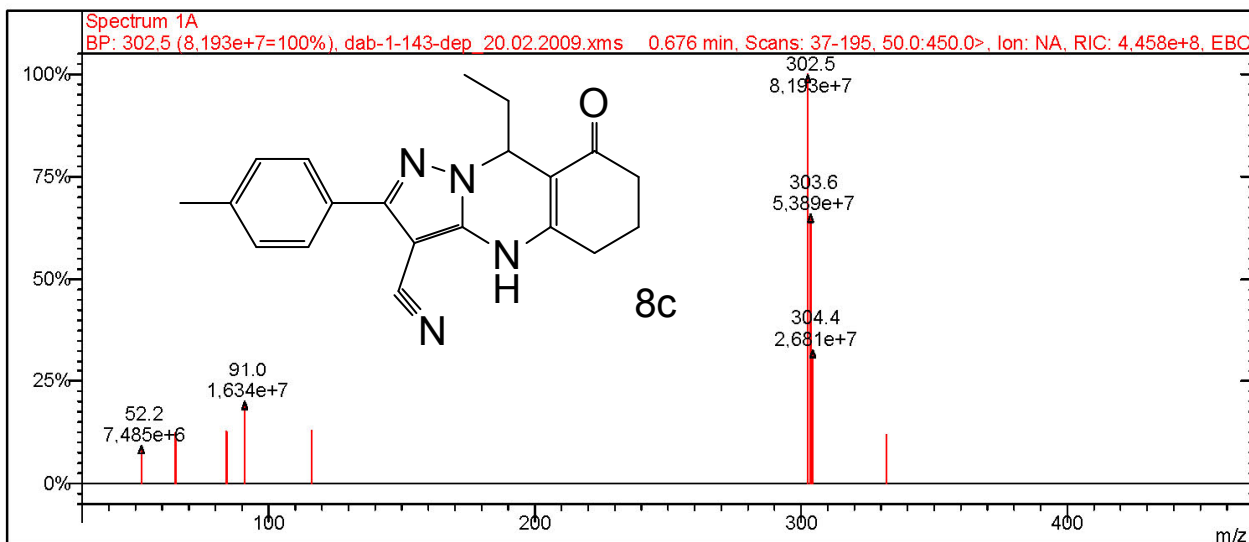

Spectrum from ...o\2015\вещества\8c\dab-1-143-dep\_20.02.2009.xms

Scan No: 117, Time: 0.676 minutes

159 points averaged. Background corrected (E).

Comment: 0.676 min. Scans: 37-195 50.0:450.0> Ion: NA RIC: 1,136e+9

Pair Count: 9 MW: 0 Formula: None

CAS No: None Acquired Range: 50.0 - 450.0 m/z

Method Description: EI

Scan 1 Channel Description: 50.0:450.0> EI;Det 1340;WI Q1 Cal;ST 0.010

Scan Information: cp = 1.1 mTorr

Precursor Mass Range: 50.0 - 450.0 m/z

| Ion  | Int      | Norm | Ion   | Int      | Norm | Ion   | Int      | Norm |
|------|----------|------|-------|----------|------|-------|----------|------|
| 52.2 | 7,485e+6 | 91   | 91.0  | 1,634e+7 | 199  | 303.6 | 5,389e+7 | 657  |
| 65.0 | 1,015e+7 | 124  | 116.1 | 1,056e+7 | 129  | 304.4 | 2,681e+7 | 327  |
| 84.2 | 1,034e+7 | 126  | 302.5 | 8,193e+7 | 999  | 332.1 | 9,698e+6 | 118  |



Scan 91 from ...золе доценко\2015\вещества\8d\dab-1-88-dep\_21.09.2015.xms

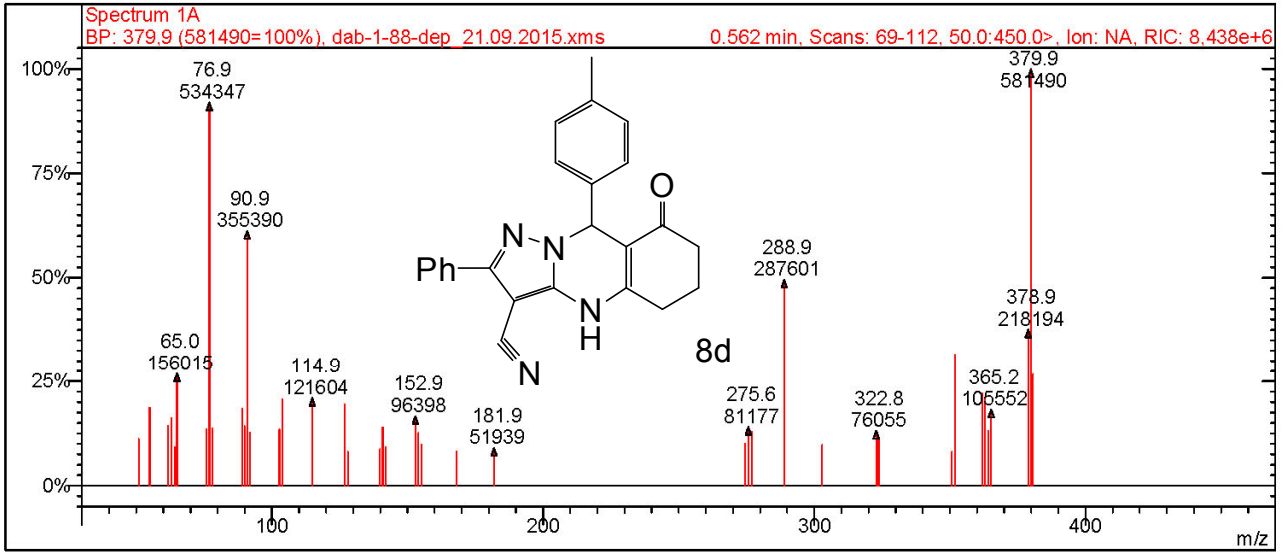

Spectrum from ...ко\2015\вещества\8d\dab-1-88-dep\_21.09.2015.xms

Scan No: 91, Time: 0.562 minutes

44 points averaged. Not background corrected.

Comment: 0.562 min. Scans: 69-112 50.0:450.0> Ion: NA RIC: 8,438e+6

Pair Count: 42 MW: 0 Formula: None

CAS No: None Acquired Range: 50.0 - 450.0 m/z

Method Description: EI

Scan 1 Channel Description: 50.0:450.0> EI;Det 1100;W1 Q1 Cal;ST 0.010

Scan Information: cp = 8.0 mTorr

Precursor Mass Range: 50.0 - 450.0 m/z

| Ion   | Int    | Norm | Ion   | Int    | Norm | Ion   | Int    | Norm |
|-------|--------|------|-------|--------|------|-------|--------|------|
| 51.0  | 64583  | 111  | 103.9 | 119614 | 205  | 277.0 | 74319  | 128  |
| 55.0  | 108156 | 186  | 114.9 | 121604 | 209  | 288.9 | 287601 | 494  |
| 61.8  | 83315  | 143  | 126.9 | 112262 | 193  | 302.9 | 56298  | 97   |
| 63.0  | 93527  | 161  | 128.1 | 46626  | 80   | 322.8 | 76055  | 131  |
| 64.1  | 53583  | 92   | 139.8 | 50259  | 86   | 323.7 | 65695  | 113  |
| 65.0  | 156015 | 268  | 140.9 | 80977  | 139  | 350.7 | 46628  | 80   |
| 75.9  | 78313  | 135  | 142.0 | 53388  | 92   | 351.9 | 183056 | 314  |
| 76.9  | 534347 | 918  | 152.9 | 96398  | 166  | 361.9 | 128155 | 220  |
| 78.0  | 79115  | 136  | 154.0 | 72758  | 125  | 363.0 | 120216 | 207  |
| 89.1  | 106308 | 183  | 155.1 | 57027  | 98   | 364.2 | 75975  | 131  |
| 90.0  | 82597  | 142  | 168.2 | 47137  | 81   | 365.2 | 105552 | 181  |
| 90.9  | 355390 | 611  | 181.9 | 51939  | 89   | 378.9 | 218194 | 375  |
| 92.0  | 72968  | 125  | 274.6 | 58325  | 100  | 379.9 | 581490 | 999  |
| 102.8 | 77575  | 133  | 275.6 | 81177  | 139  | 380.6 | 155262 | 267  |

Scan 206 from ... доценко\2015\вещества\9\dab-02-104-p1-dep\_21.09.2015.xms

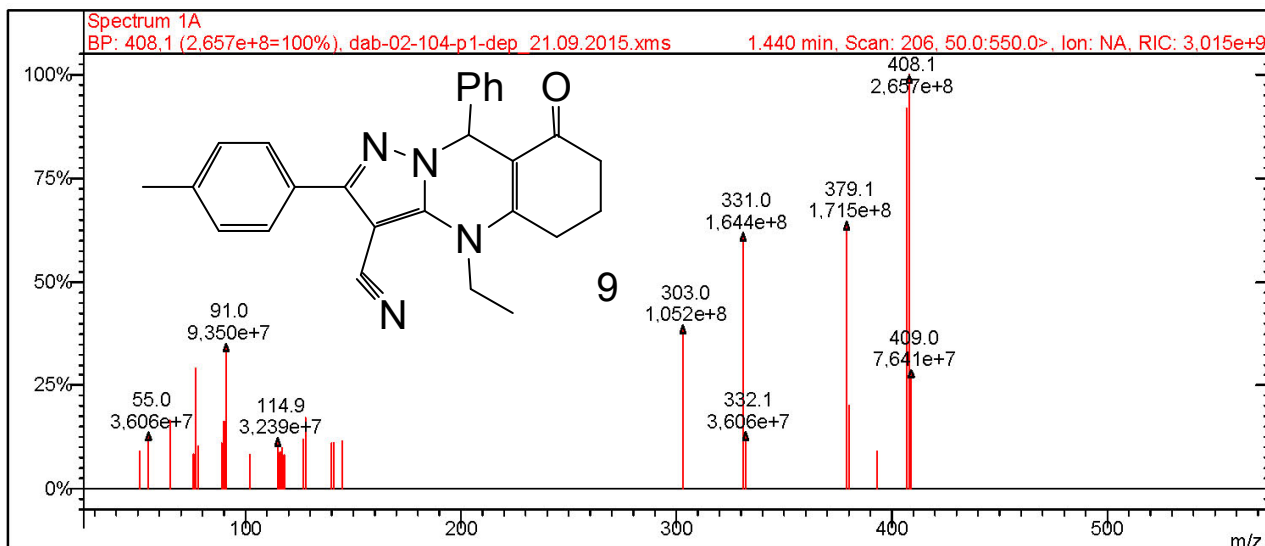

Spectrum from ...015\вещества\9\dab-02-104-p1-dep\_21.09.2015.xms

Scan No: 206, Time: 1.440 minutes

No averaging. Not background corrected.

Comment: 1.440 min, Scan: 206 50.0:550.0> Ion: NA RIC: 3,015e+9

Pair Count: 28 MW: 0 Formula: None

CAS No: None Acquired Range: 50.0 - 550.0 m/z

Method Description: EI

Scan 1 Channel Description: 50.0:550.0> EI;Det 0;WI Q1 Cal;ST 0.010

Scan Information: cp = 8.0 mTorr

Precursor Mass Range: 50.0 - 550.0 m/z

| Ion   | Int      | Norm | Ion   | Int      | Norm | Ion   | Int      | Norm |
|-------|----------|------|-------|----------|------|-------|----------|------|
| 51.0  | 2,393e+7 | 90   | 114.9 | 3,239e+7 | 122  | 303.0 | 1,052e+8 | 395  |
| 55.0  | 3,606e+7 | 136  | 116.0 | 2,328e+7 | 88   | 331.0 | 1,644e+8 | 618  |
| 64.9  | 4,359e+7 | 164  | 116.9 | 2,605e+7 | 98   | 332.1 | 3,606e+7 | 136  |
| 75.9  | 2,186e+7 | 82   | 117.9 | 2,133e+7 | 80   | 379.1 | 1,715e+8 | 645  |
| 76.9  | 7,757e+7 | 292  | 126.8 | 3,144e+7 | 118  | 380.0 | 5,312e+7 | 200  |
| 78.0  | 2,700e+7 | 101  | 127.9 | 4,536e+7 | 171  | 393.0 | 2,383e+7 | 90   |
| 89.0  | 2,893e+7 | 109  | 139.9 | 2,897e+7 | 109  | 407.0 | 2,439e+8 | 917  |
| 90.0  | 4,292e+7 | 161  | 140.9 | 2,909e+7 | 109  | 408.1 | 2,657e+8 | 999  |
| 91.0  | 9,350e+7 | 351  | 144.9 | 3,014e+7 | 113  | 409.0 | 7,641e+7 | 287  |
| 101.9 | 2,177e+7 | 82   |       |          |      |       |          |      |

Scan 78 from ...ценко\2015\вещества\10\dab-02-107-p2-dep-r\_21.09.2015.xms

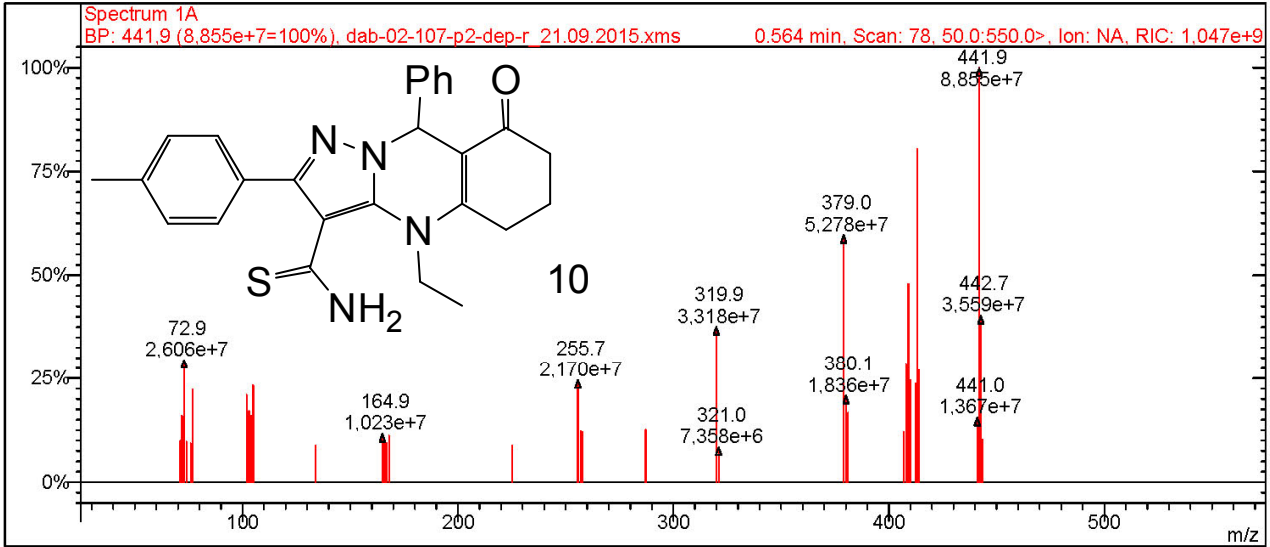

Spectrum from ...\вещества\10\dab-02-107-p2-dep-r\_21.09.2015.xms  
 Scan No: 78, Time: 0.564 minutes  
 No averaging. Not background corrected.  
 Comment: 0.564 min. Scan: 78 50.0:550.0> Ion: NA RIC: 1,047e+9  
 Pair Count: 36 MW: 0 Formula: None  
 CAS No: None Acquired Range: 50.0 - 550.0 m/z

Method Description: EI  
 Scan 1 Channel Description: 50.0:550.0> EI;Det 1100;WI Q1 Cal;ST 0.010  
 Scan Information: cp = 8.0 mTorr  
 Precursor Mass Range: 50.0 - 550.0 m/z

| Ion   | Int      | Norm | Ion   | Int      | Norm | Ion   | Int      | Norm |
|-------|----------|------|-------|----------|------|-------|----------|------|
| 71.1  | 8,773e+6 | 99   | 165.9 | 8,177e+6 | 92   | 381.0 | 1,471e+7 | 166  |
| 71.9  | 1,412e+7 | 159  | 166.9 | 8,217e+6 | 93   | 407.0 | 1,069e+7 | 121  |
| 72.9  | 2,606e+7 | 294  | 168.0 | 9,845e+6 | 111  | 408.0 | 2,505e+7 | 283  |
| 74.0  | 8,579e+6 | 97   | 225.1 | 7,788e+6 | 88   | 409.1 | 4,241e+7 | 478  |
| 75.9  | 8,227e+6 | 93   | 255.7 | 2,170e+7 | 245  | 410.1 | 2,173e+7 | 245  |
| 76.9  | 1,973e+7 | 223  | 256.9 | 1,083e+7 | 122  | 412.4 | 2,101e+7 | 237  |
| 101.9 | 1,854e+7 | 209  | 257.9 | 1,066e+7 | 120  | 413.1 | 7,117e+7 | 803  |
| 103.0 | 1,512e+7 | 171  | 287.1 | 1,110e+7 | 125  | 414.1 | 2,392e+7 | 270  |
| 104.0 | 1,409e+7 | 159  | 319.9 | 3,318e+7 | 374  | 441.0 | 1,367e+7 | 154  |
| 104.9 | 2,059e+7 | 232  | 321.0 | 7,358e+6 | 83   | 441.9 | 8,855e+7 | 999  |
| 133.9 | 7,658e+6 | 86   | 379.0 | 5,278e+7 | 595  | 442.7 | 3,559e+7 | 402  |
| 164.9 | 1,023e+7 | 115  | 380.1 | 1,836e+7 | 207  | 443.6 | 8,977e+6 | 101  |

## 5. IR spectra of synthesized compounds

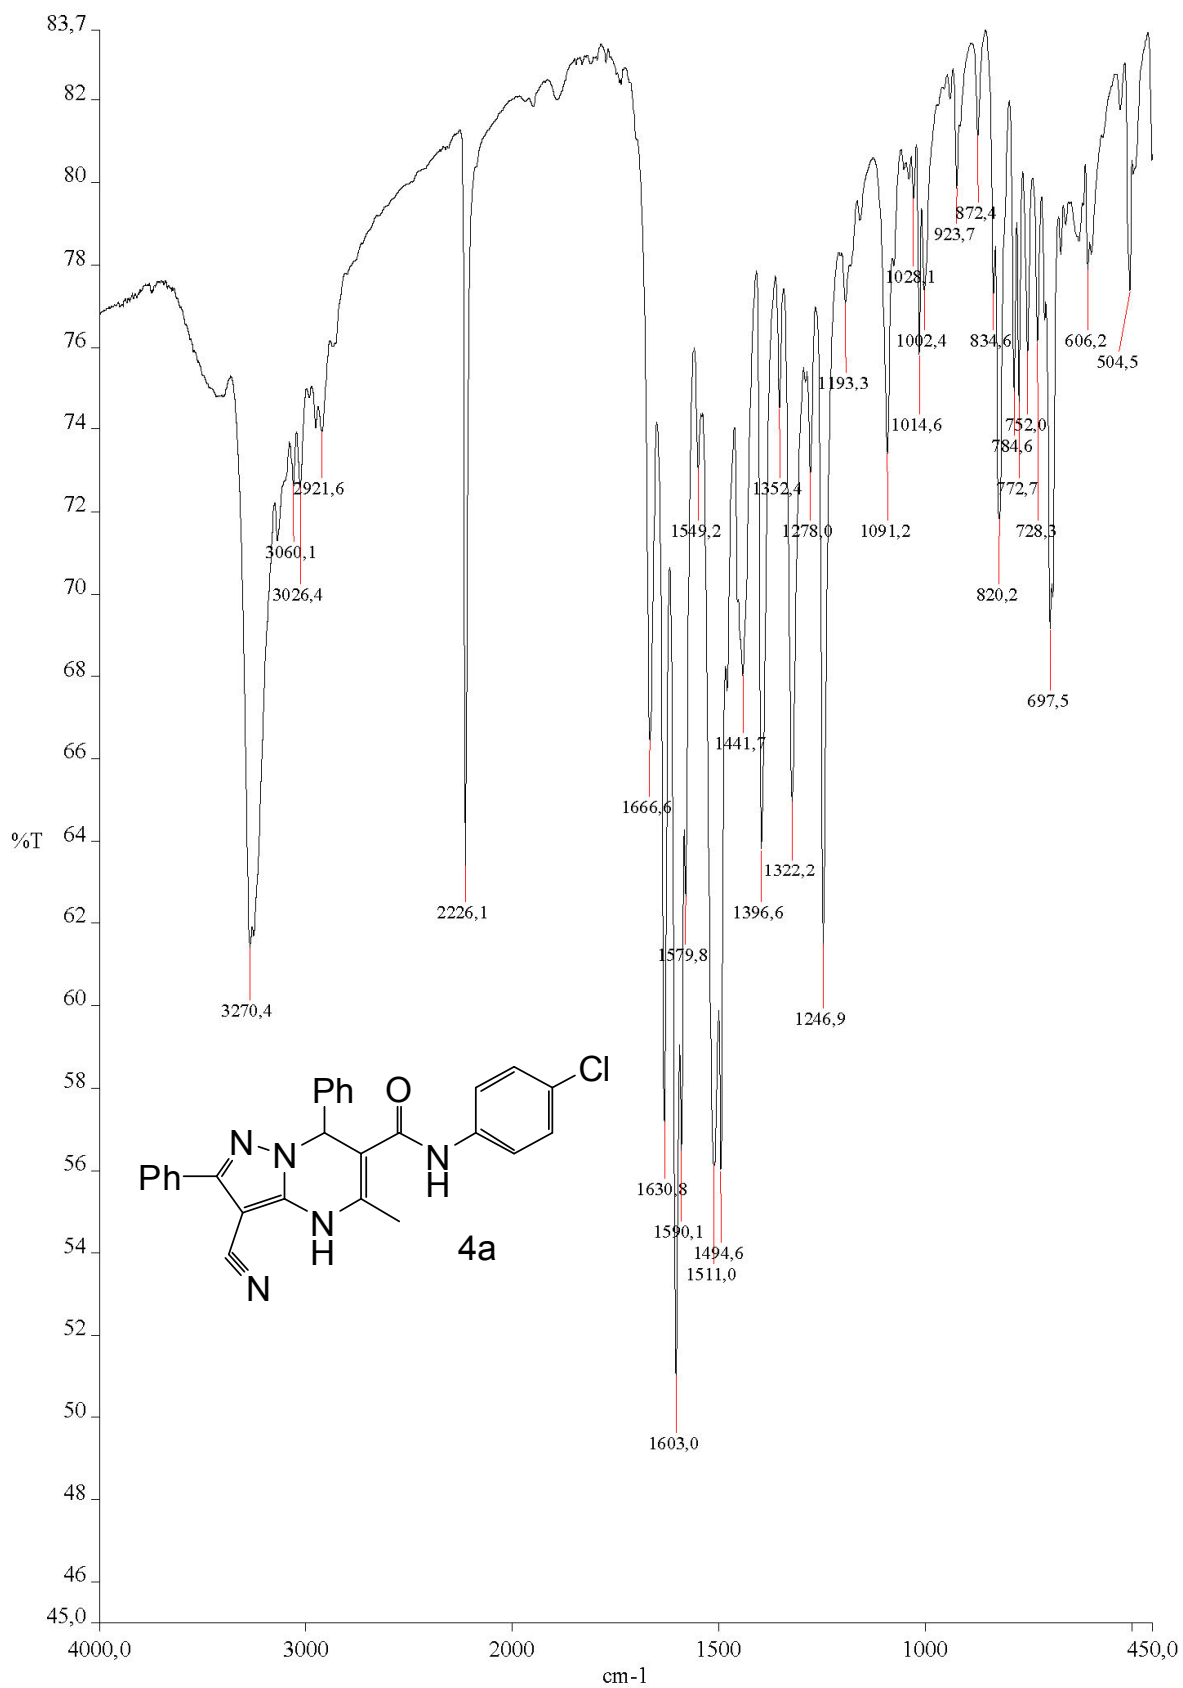

c:\pel\_data\spectra\# 9438.sp - DAB-1-79

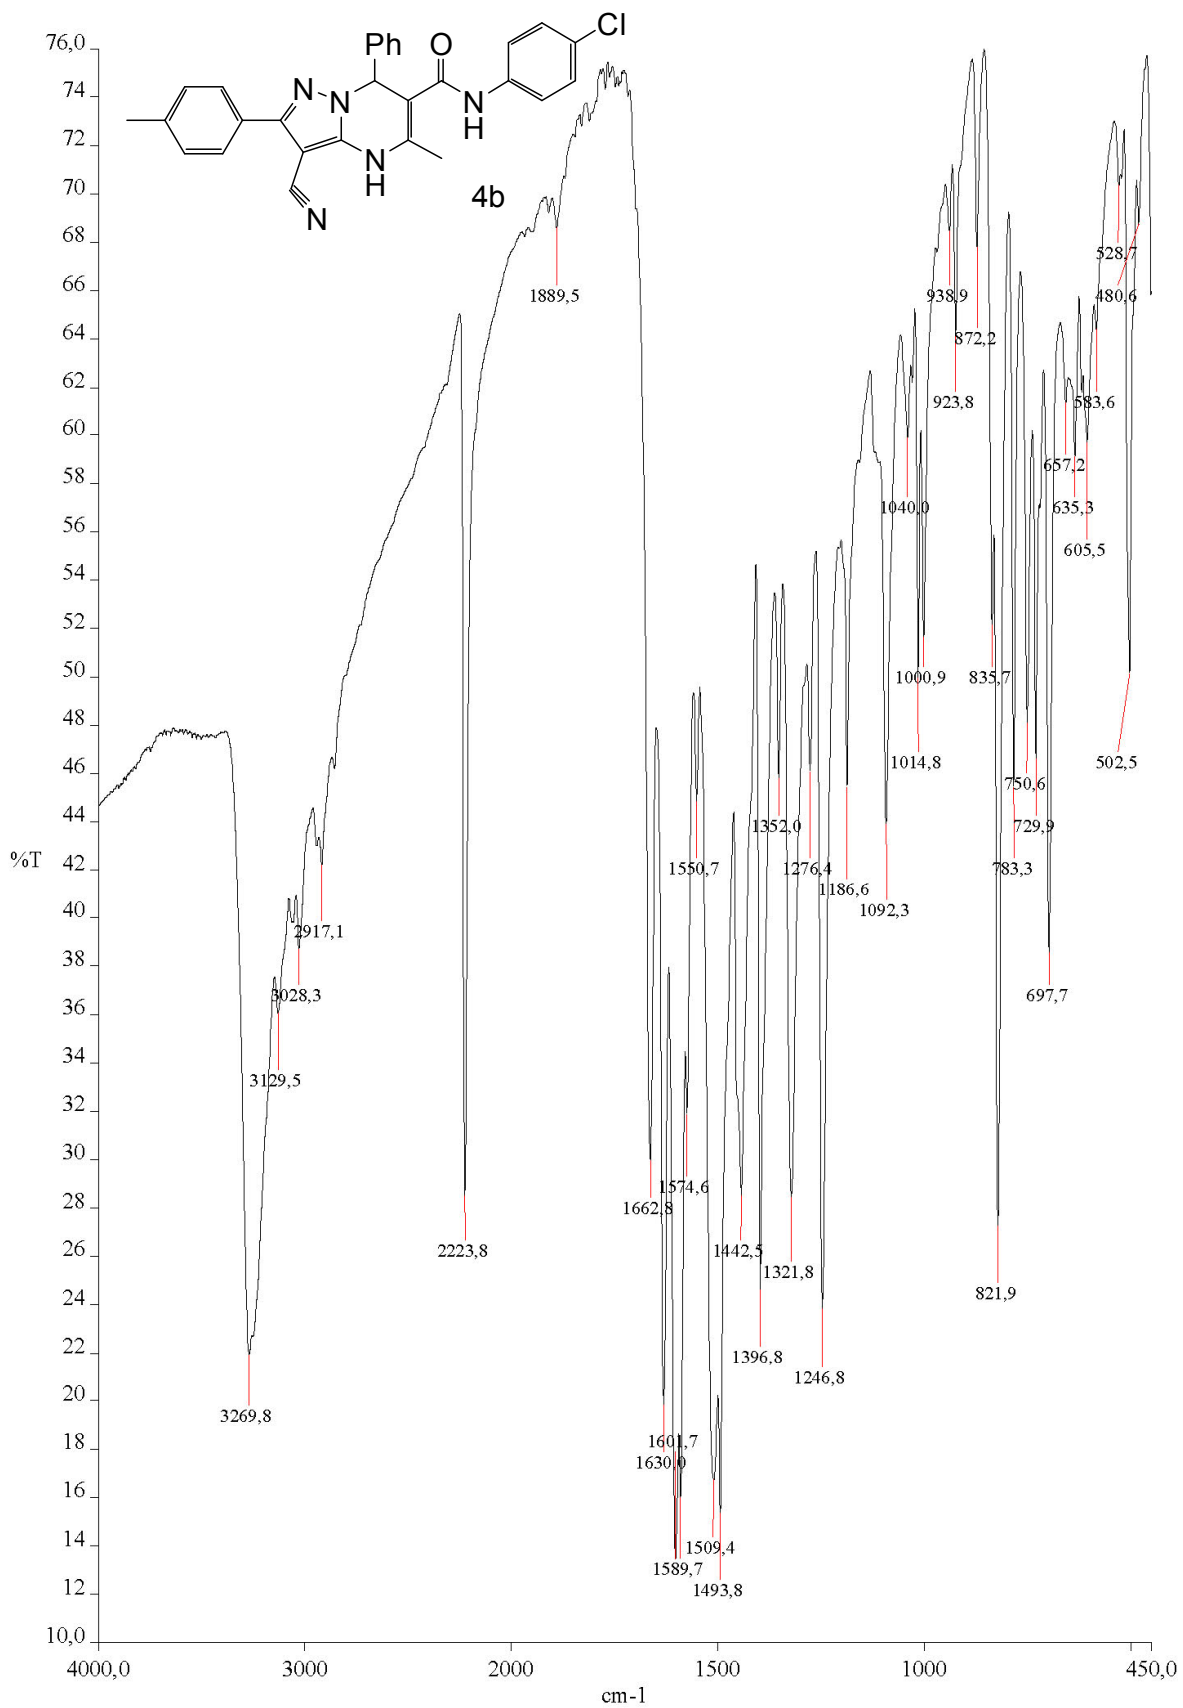

c:\pel\_data\spectra\# 9443.sp - DAB-1-124

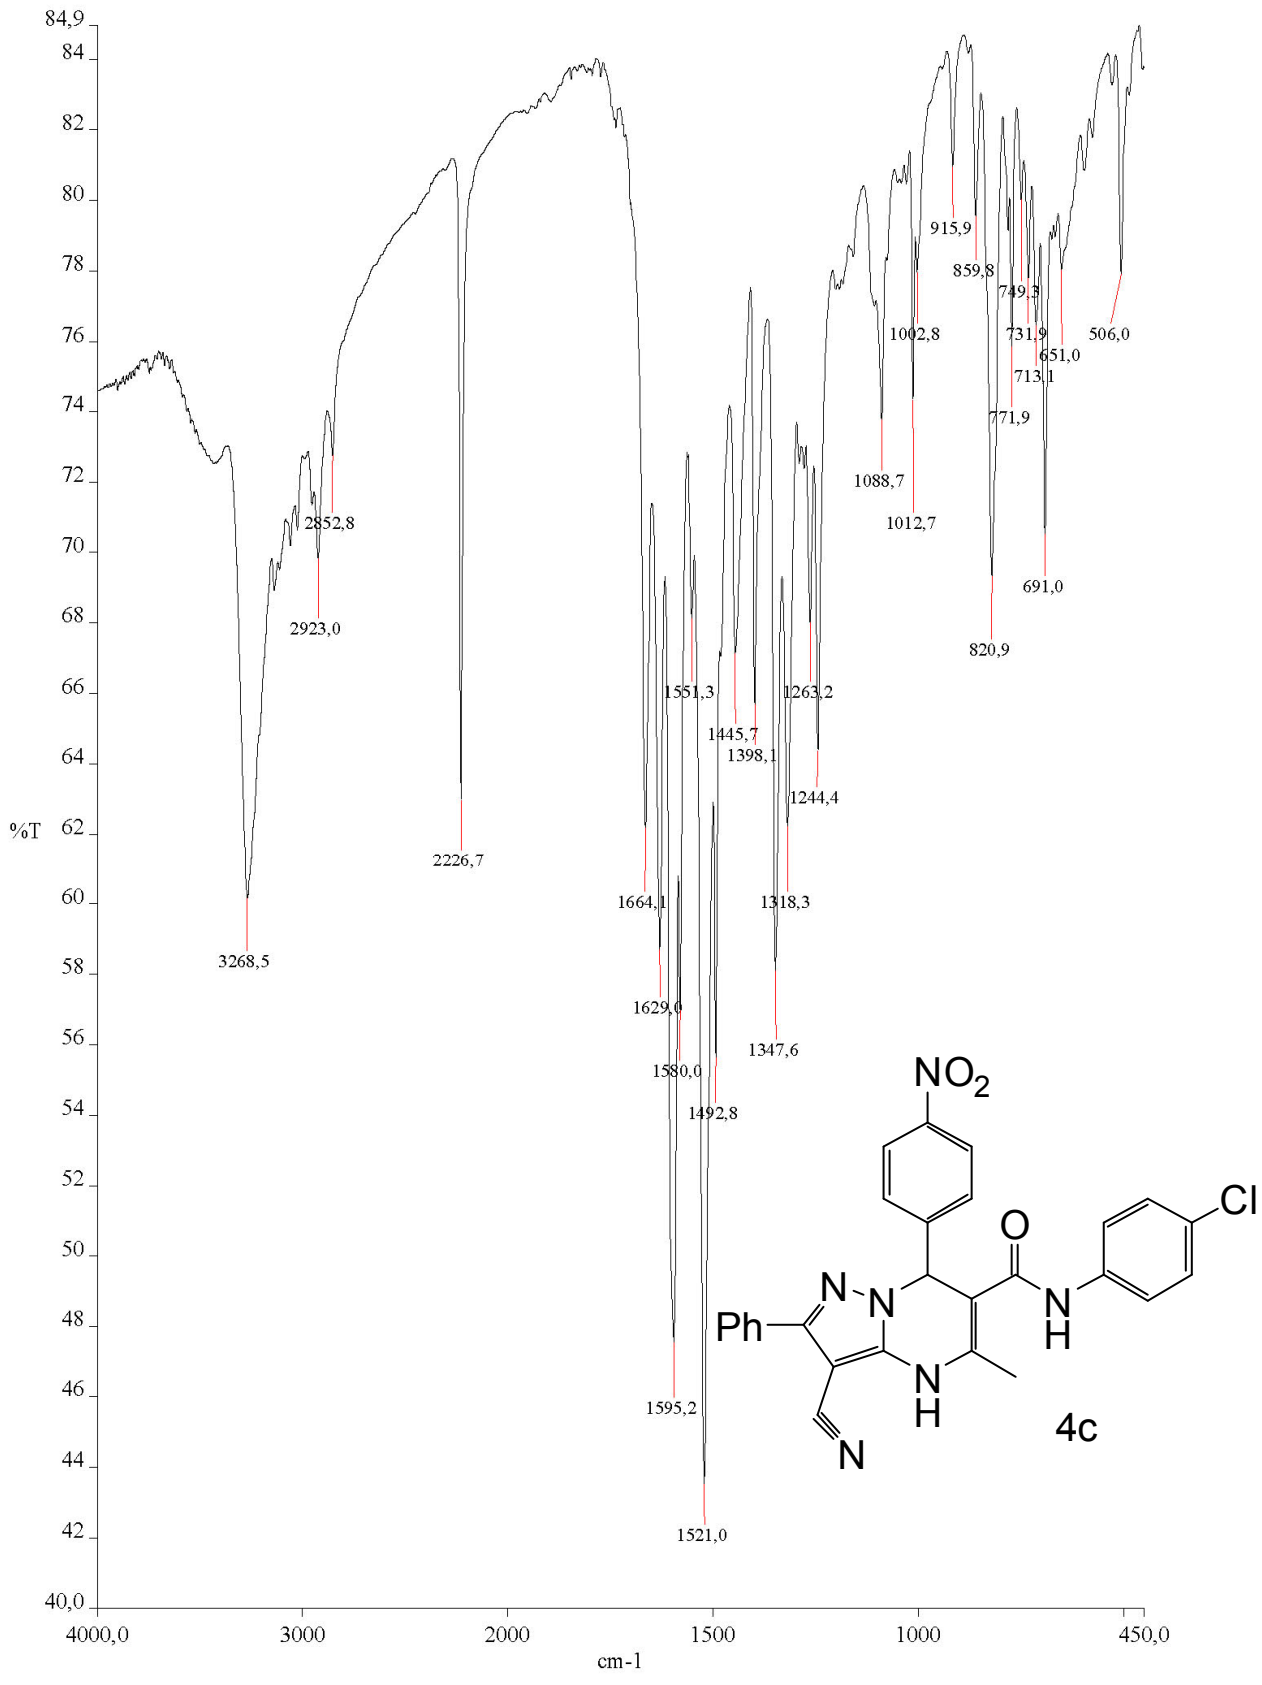

c:\pel\_data\spectra# 9440.sp - DAB-1-86

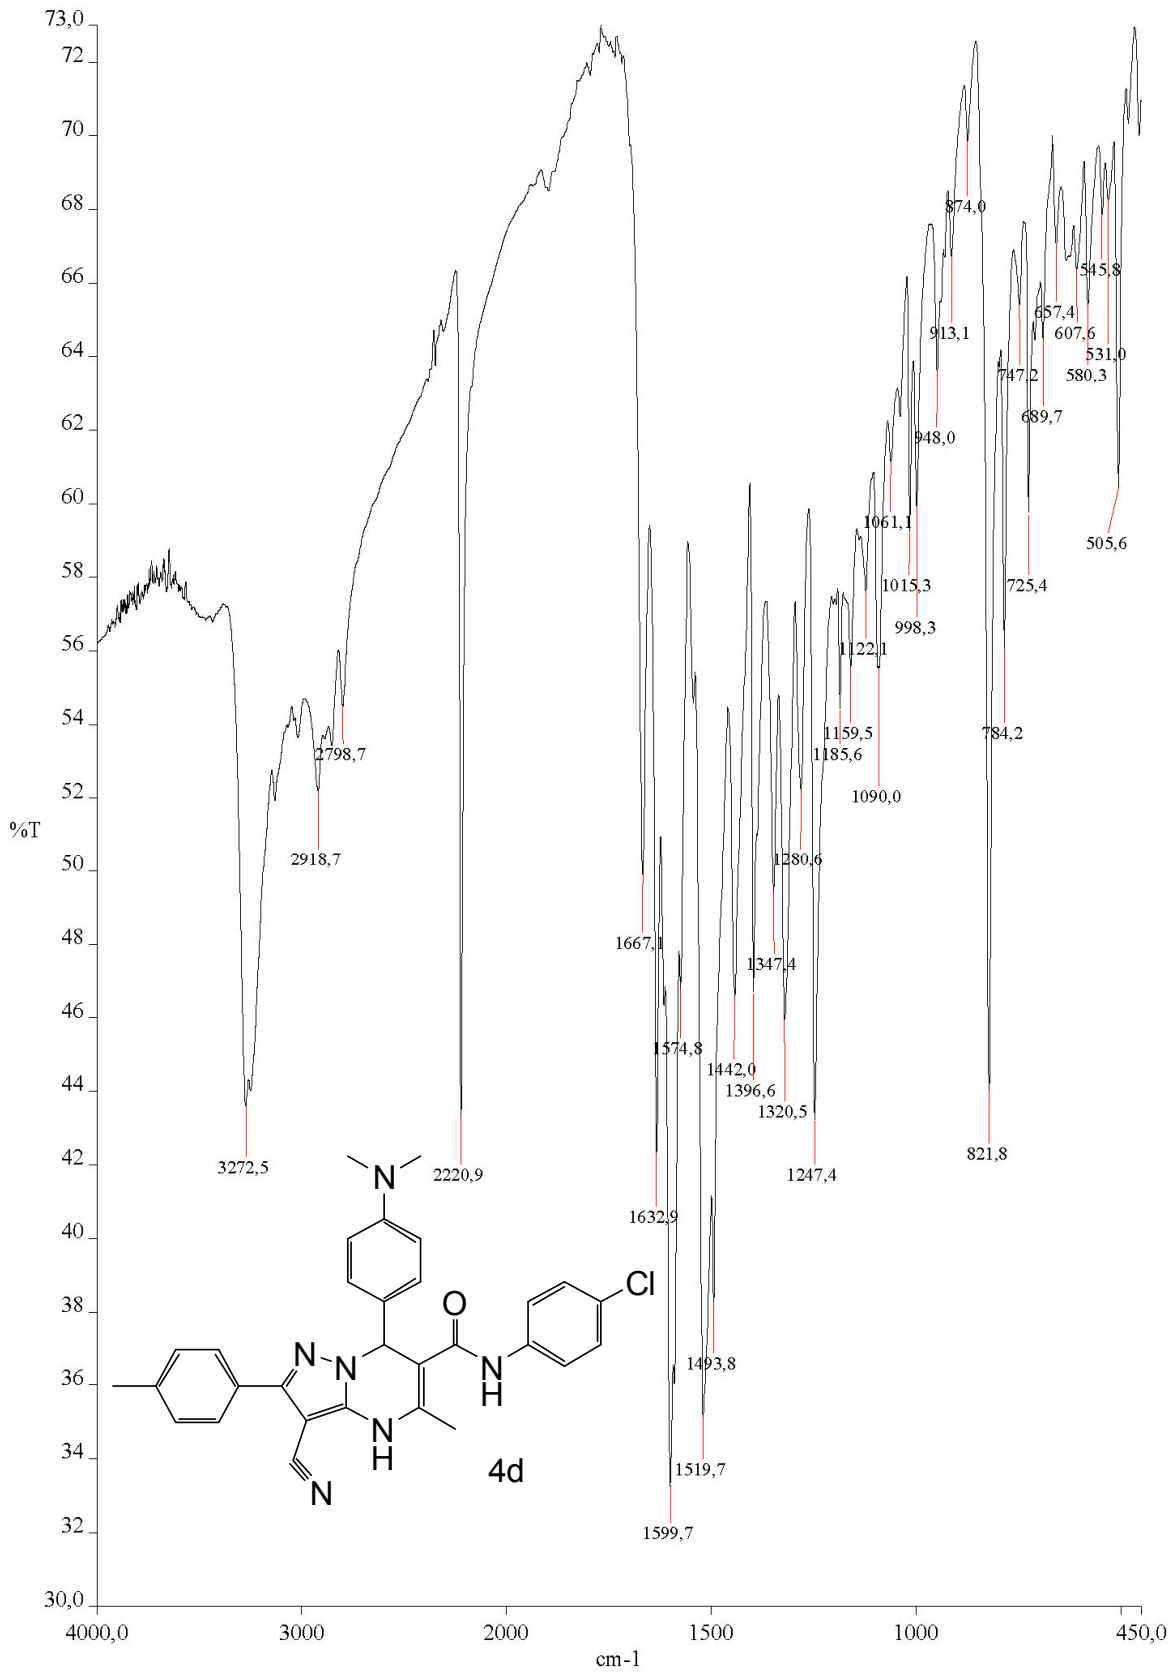

c:\pel\_data\spectra# 9442.sp - DAB-1-93

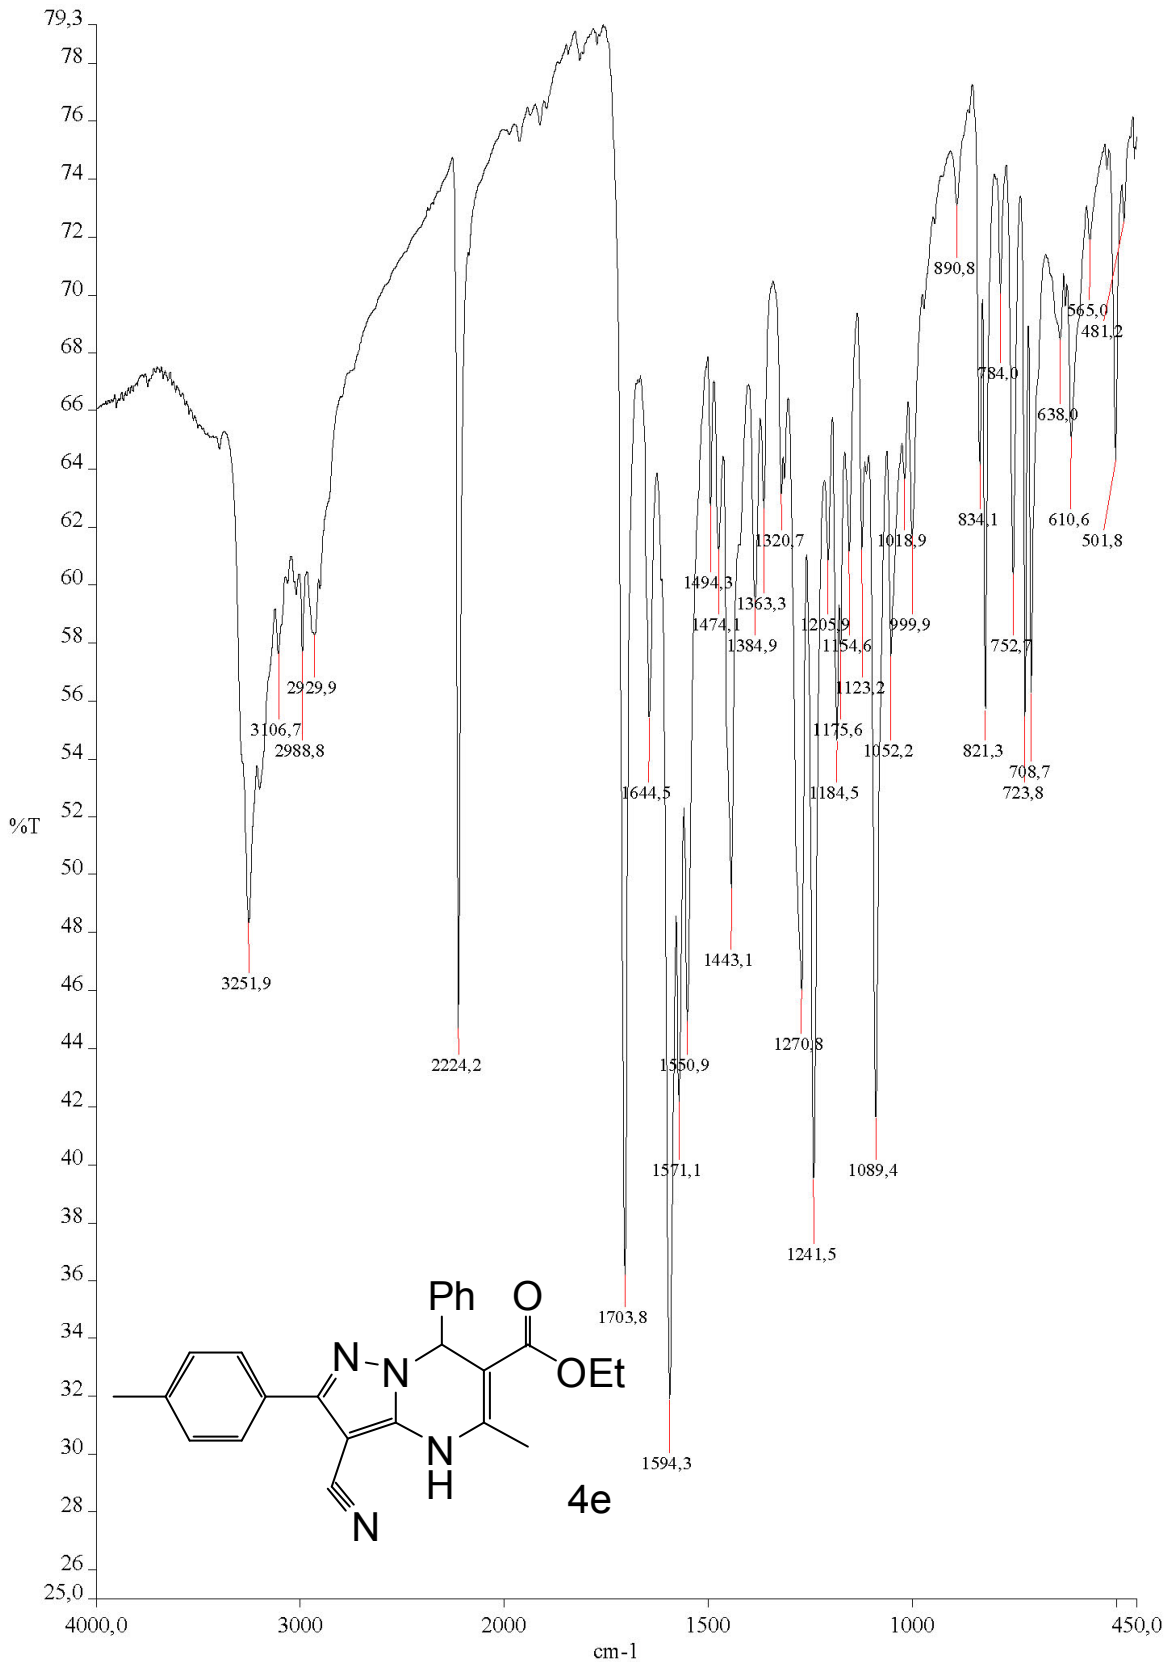

c:\pel\_data\spectra# 9445.sp - DAB-1-137



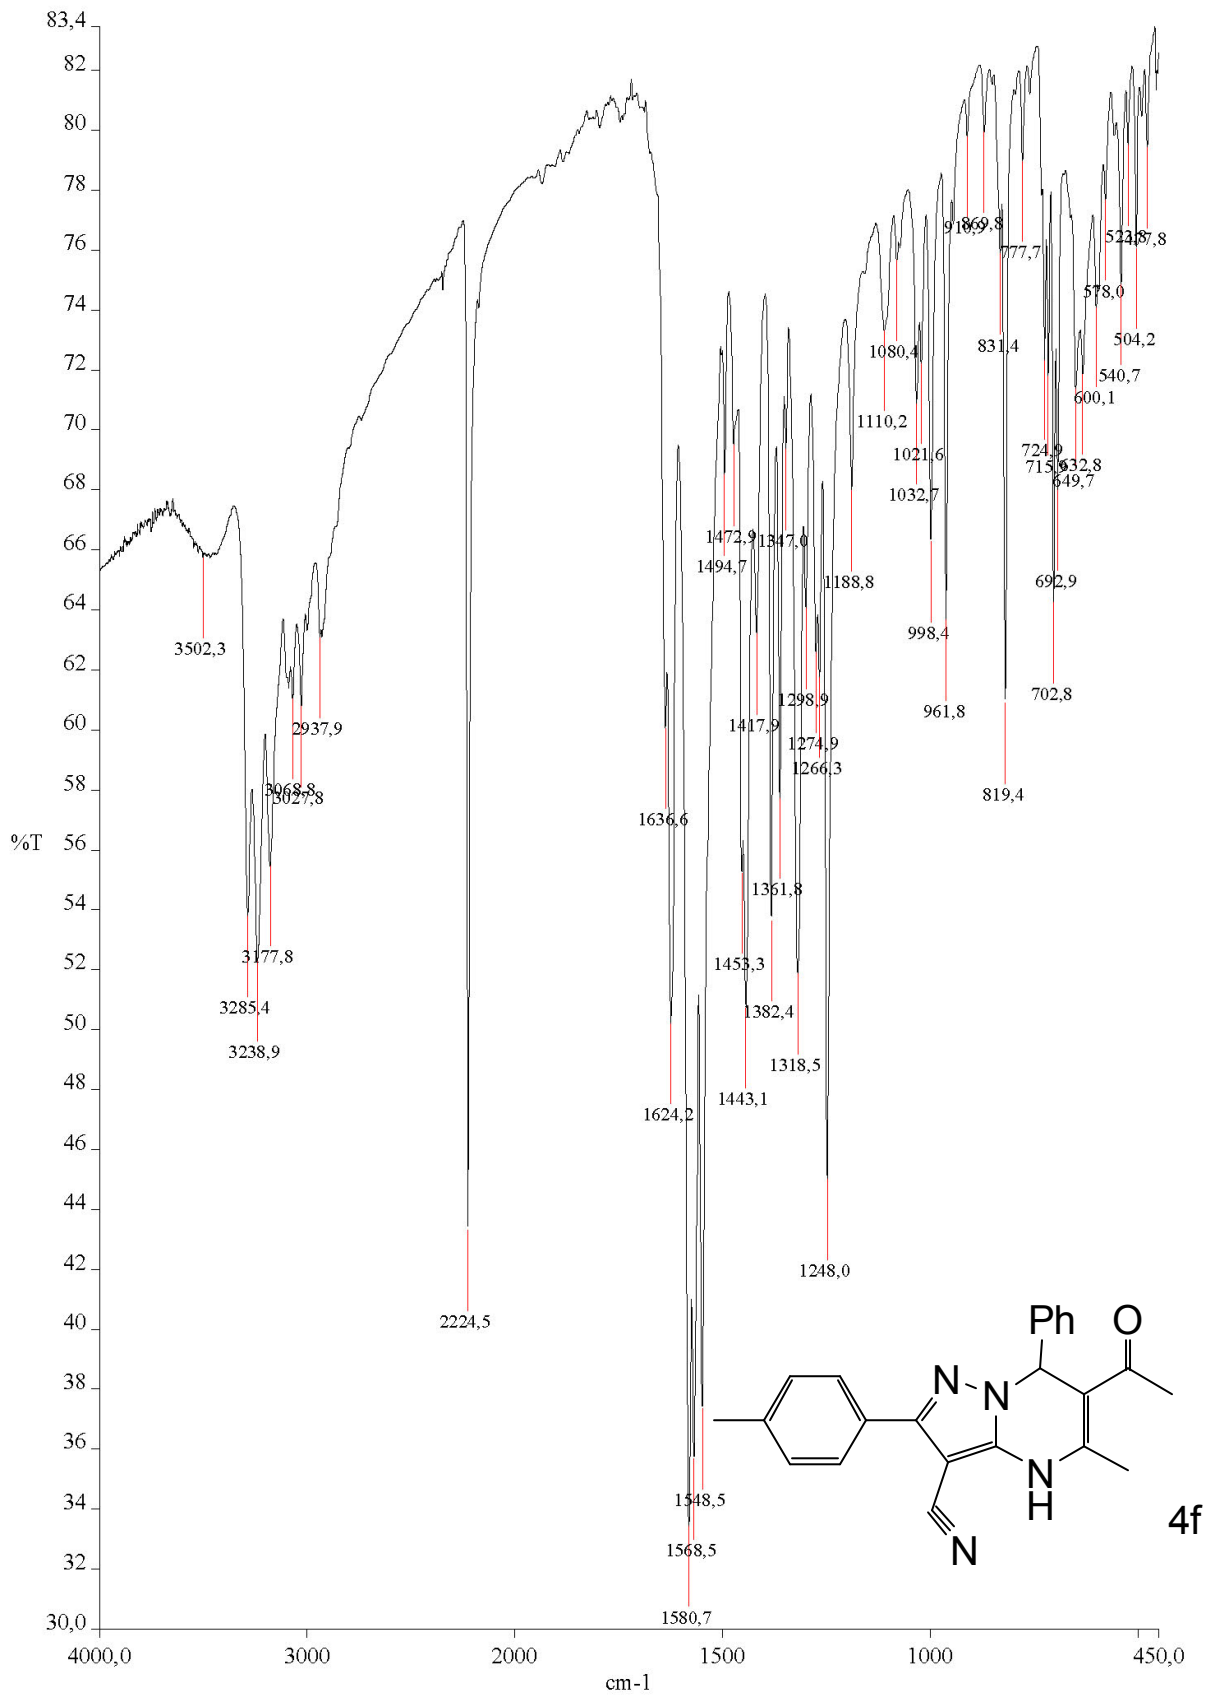

c:\pel\_data\spectra# 9449.sp - DAB-1-188

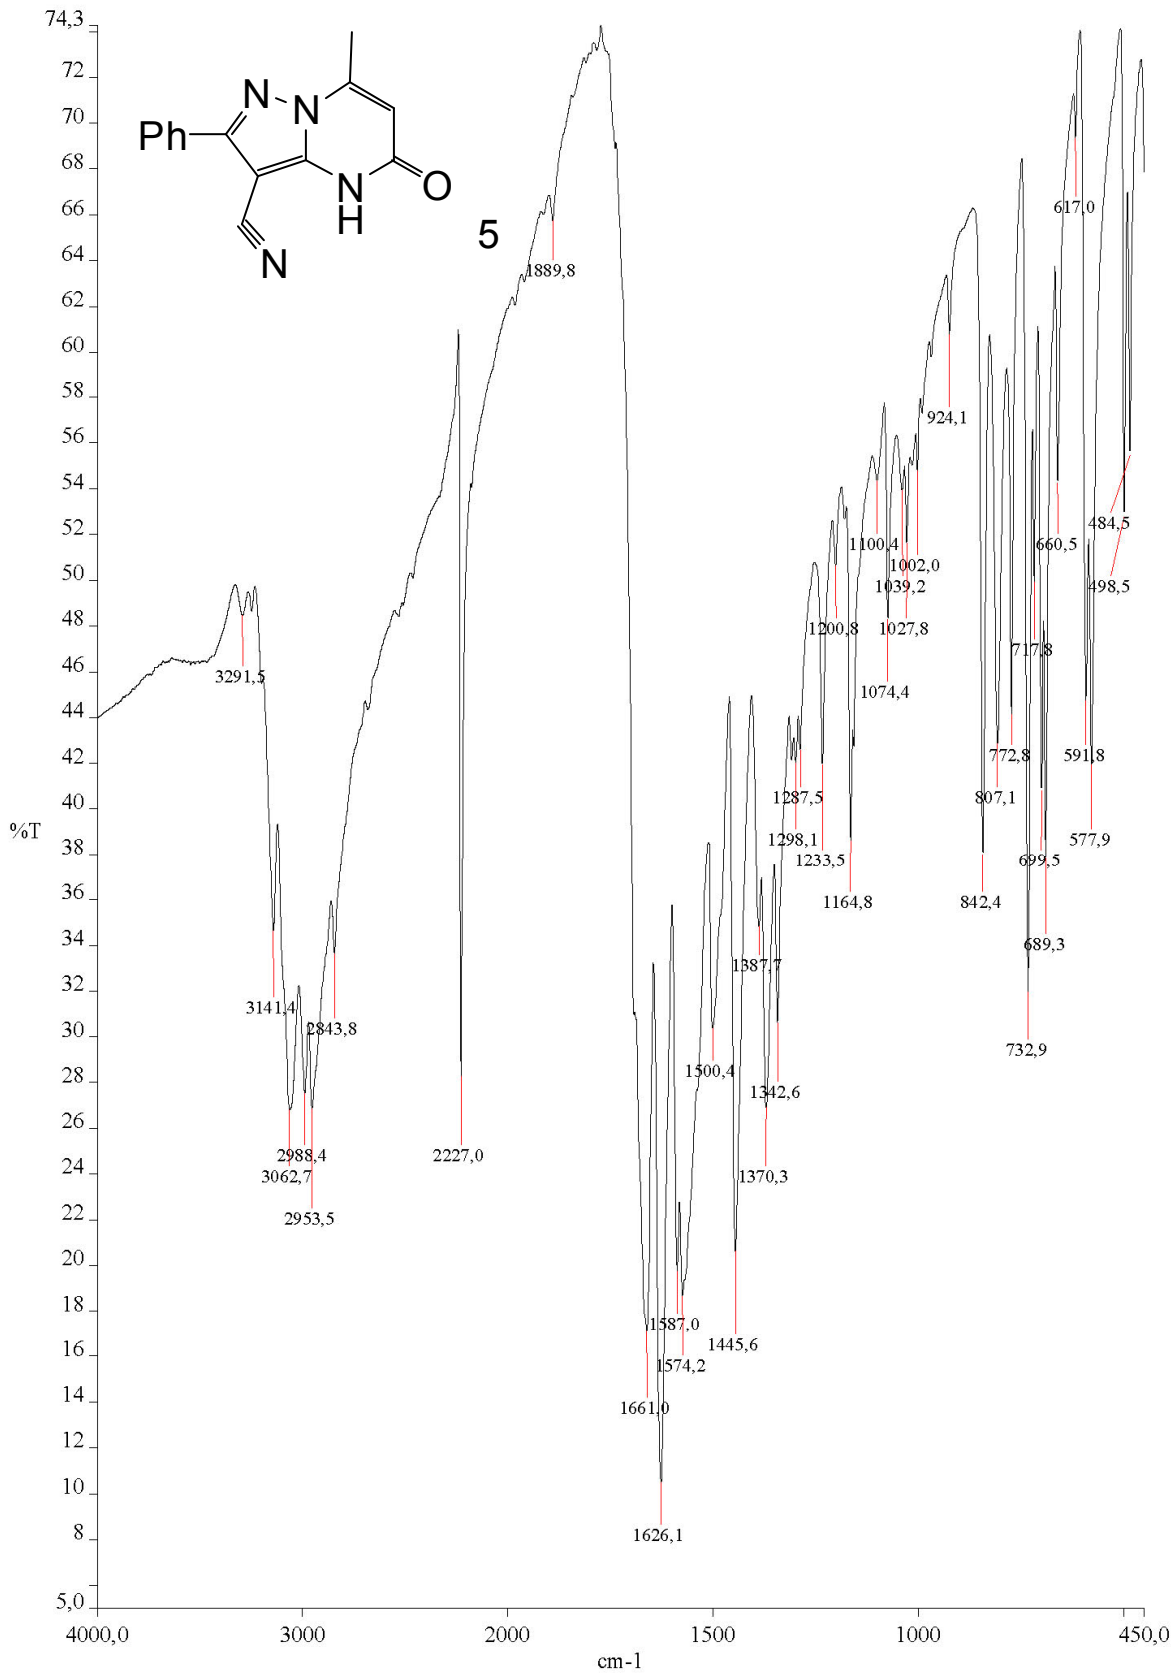

c:\pel\_data\spectra# 9439.sp - DAB-1-81

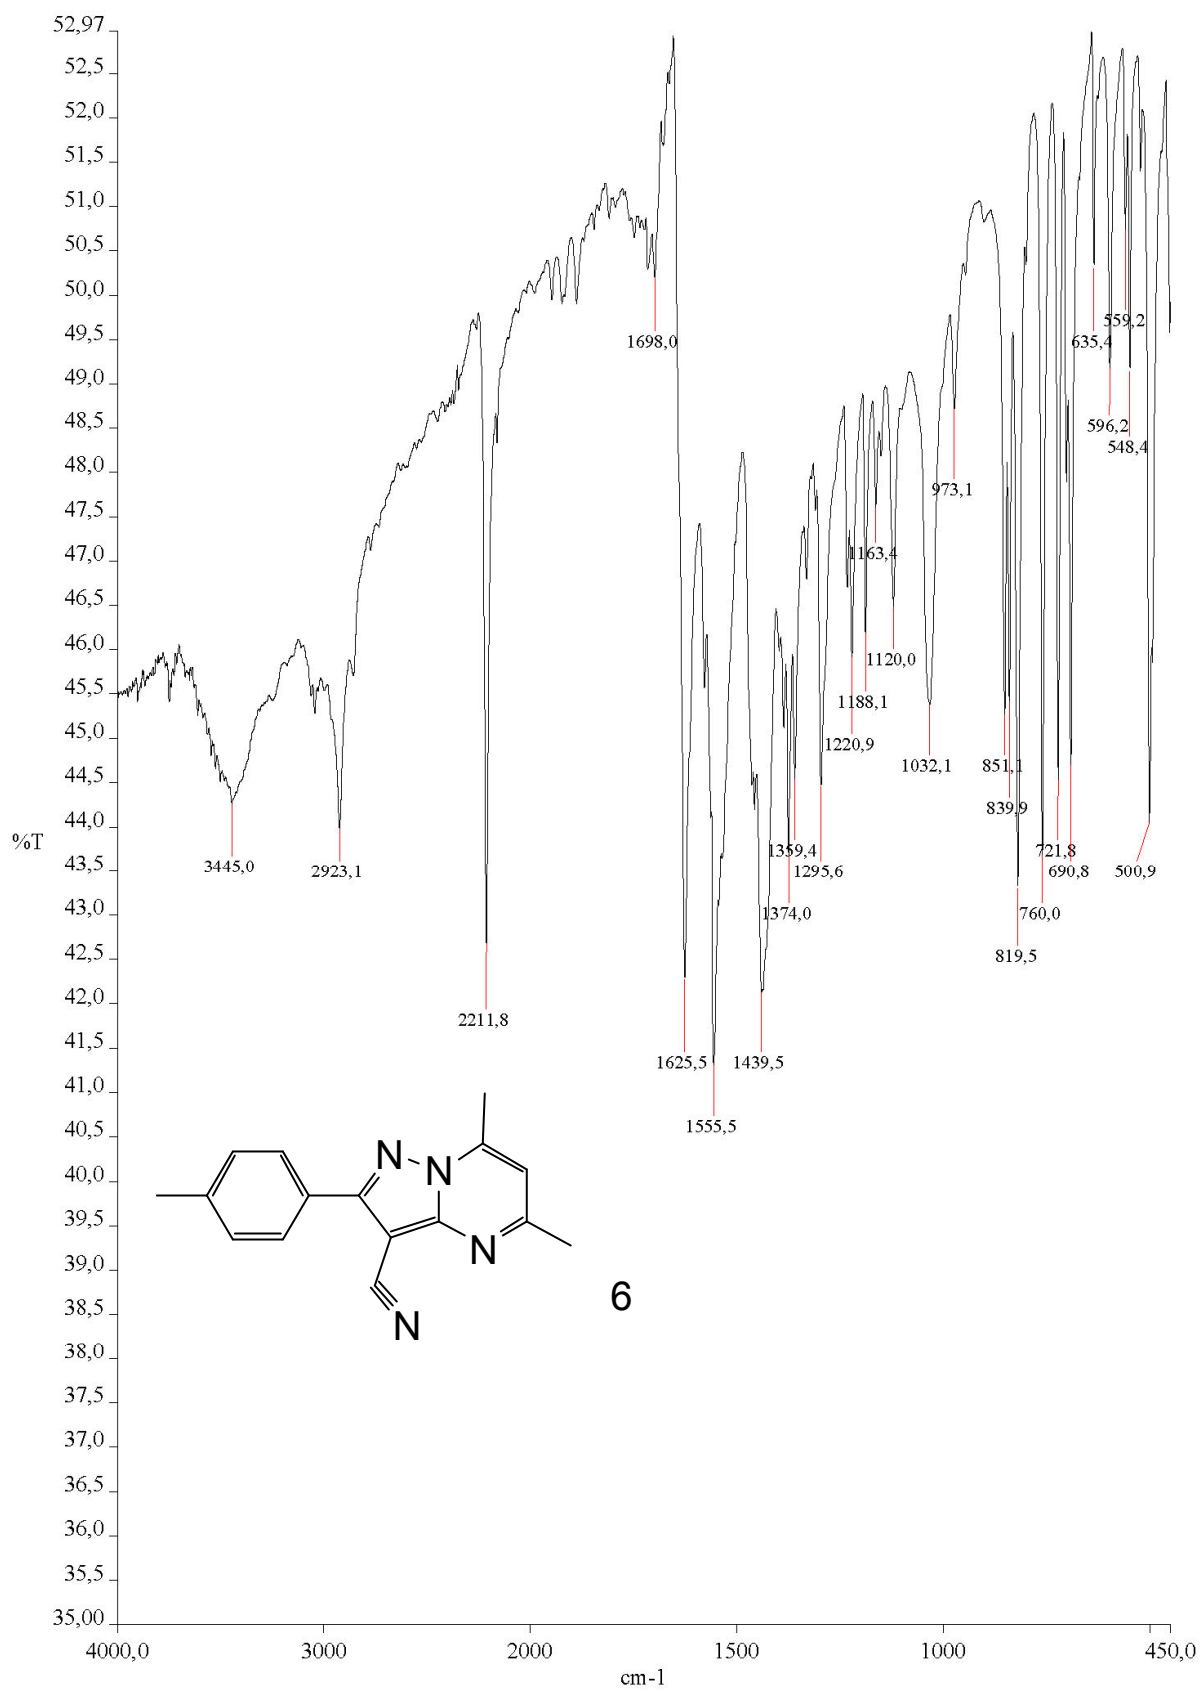

c:\pel\_data\spectra\# 9448.sp - DAB-1-149

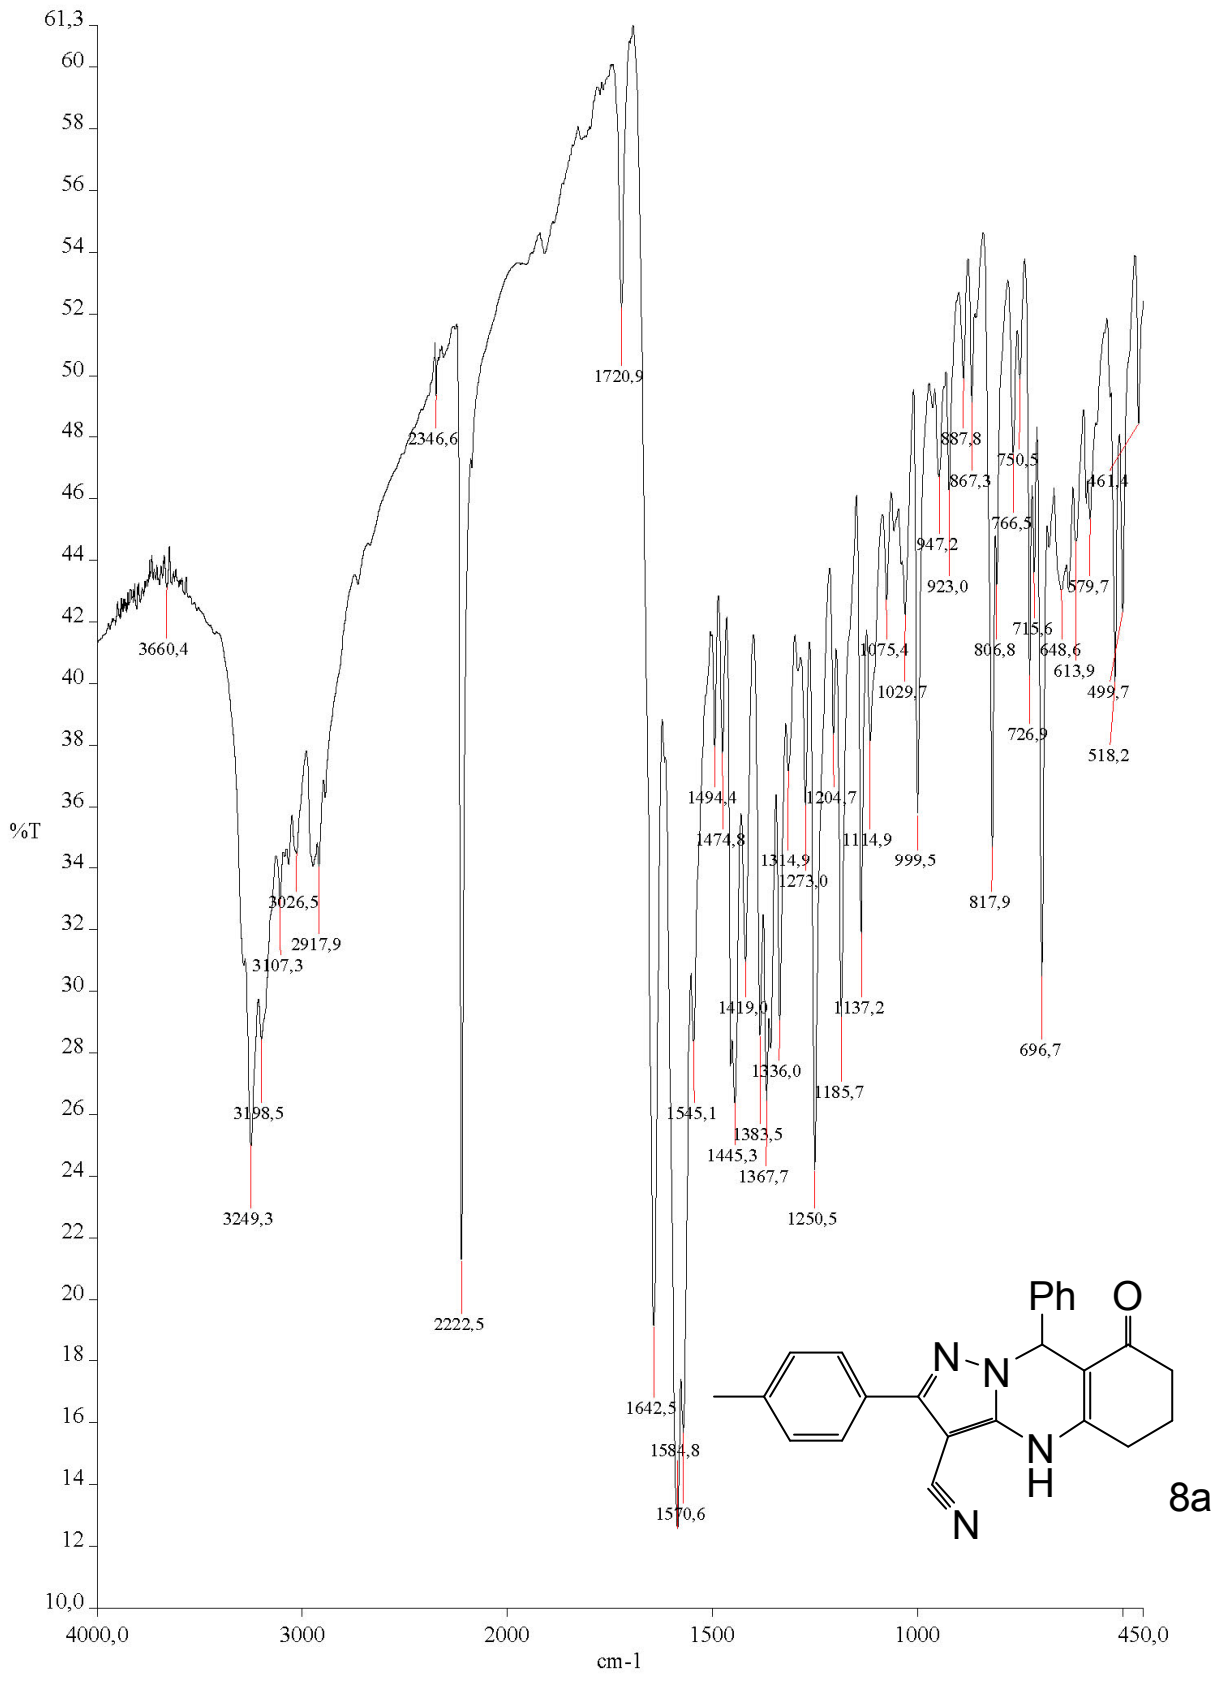

c:\pel\_data\spectra# 9444.sp - DAB-1-136

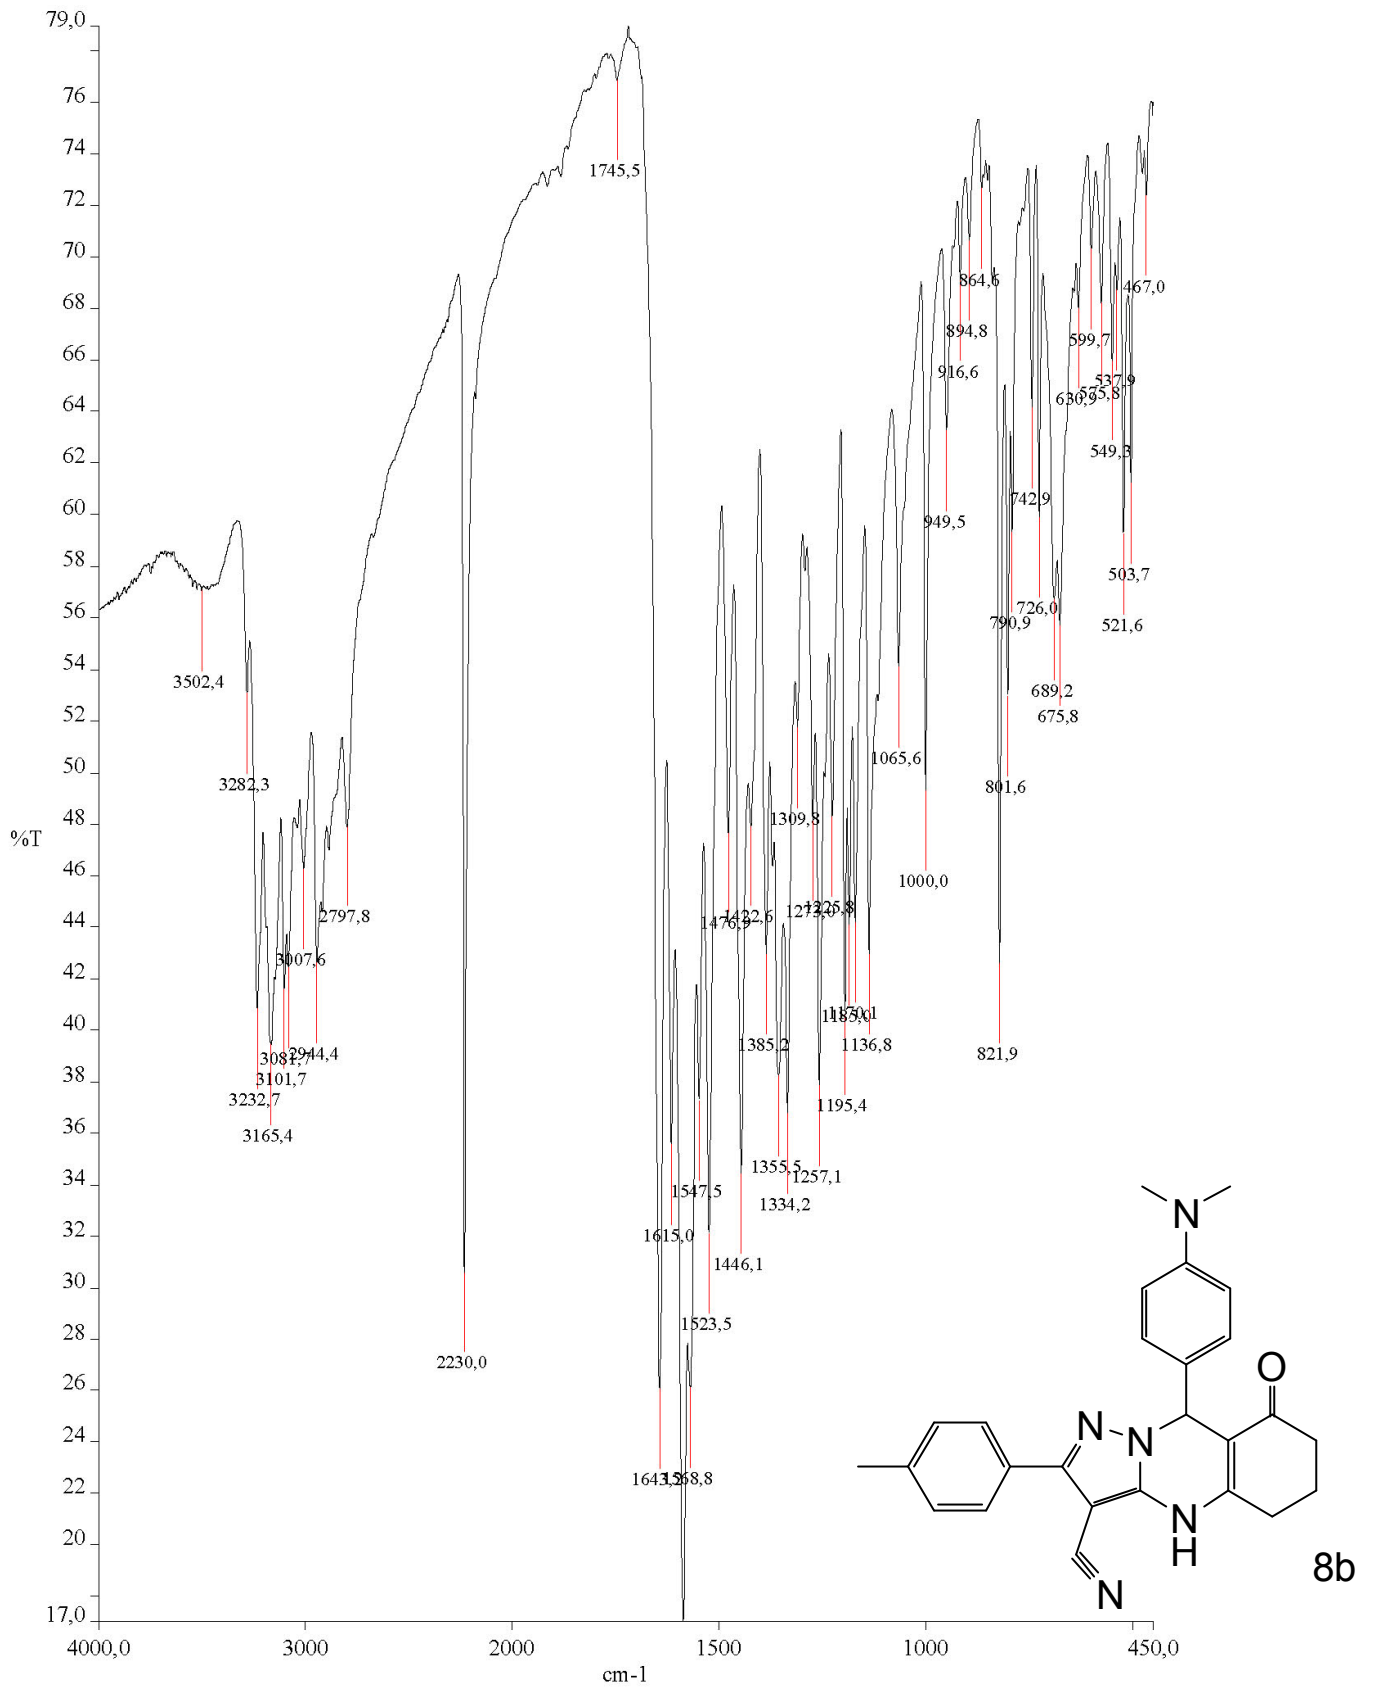

c:\pel\_data\spectra\# 9447.sp - DAB-1-144

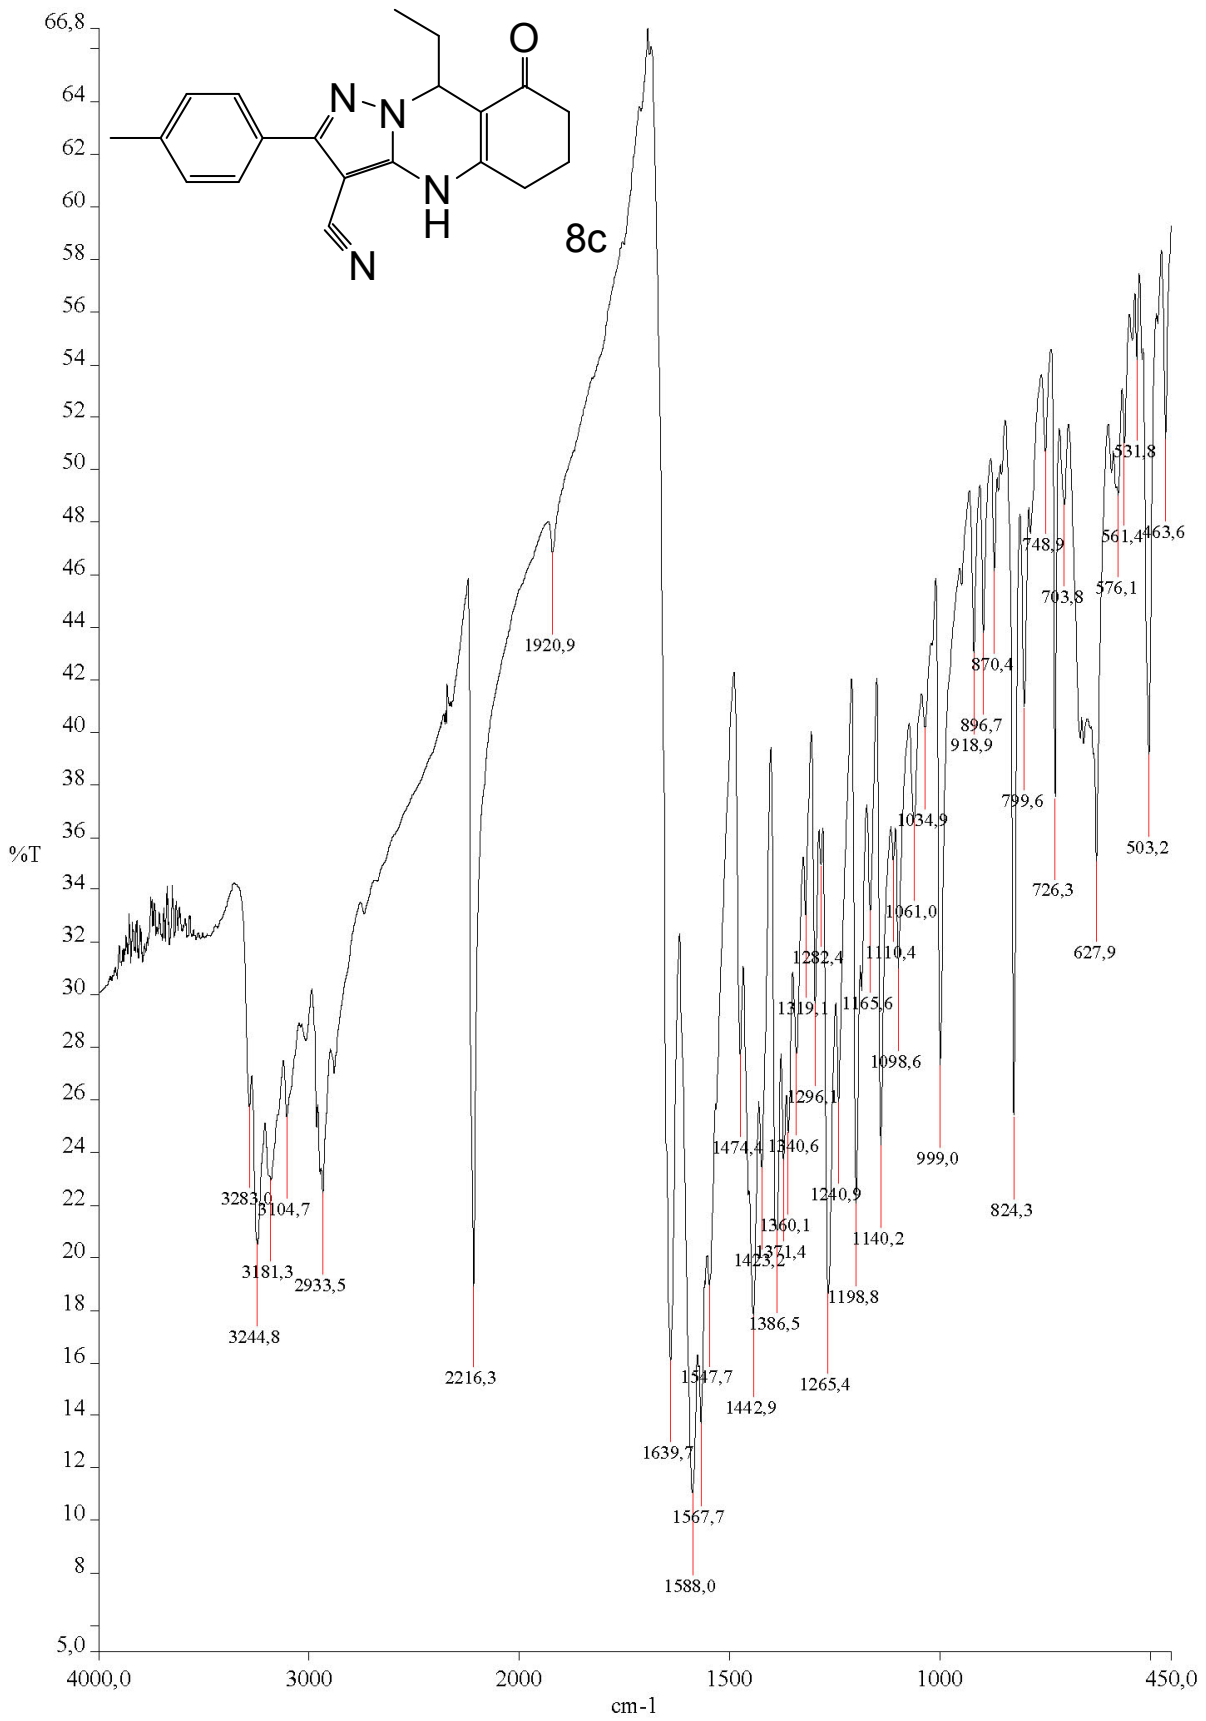

c:\pel\_data\spectra# 9446.sp - DAB-1-143

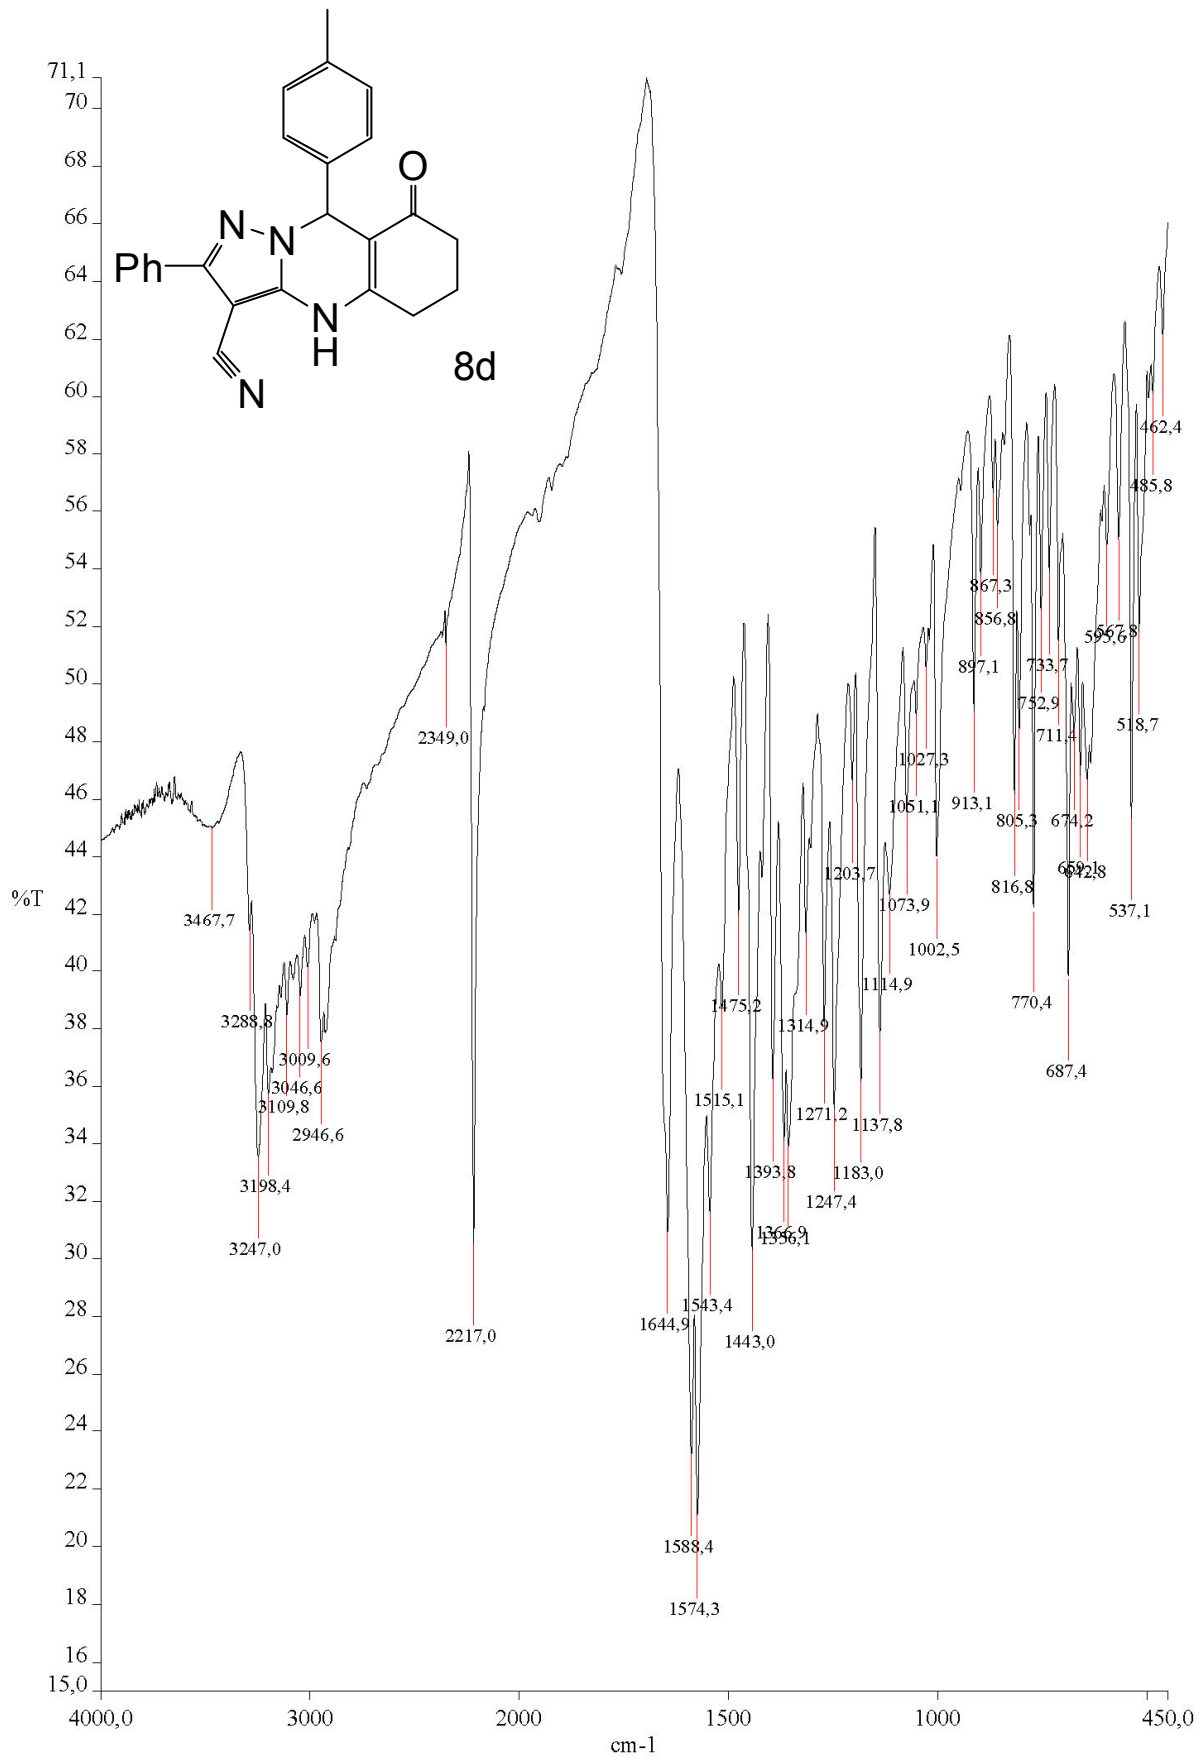

c:\pel\_data\spectra# 9441.sp - DAB-1-88

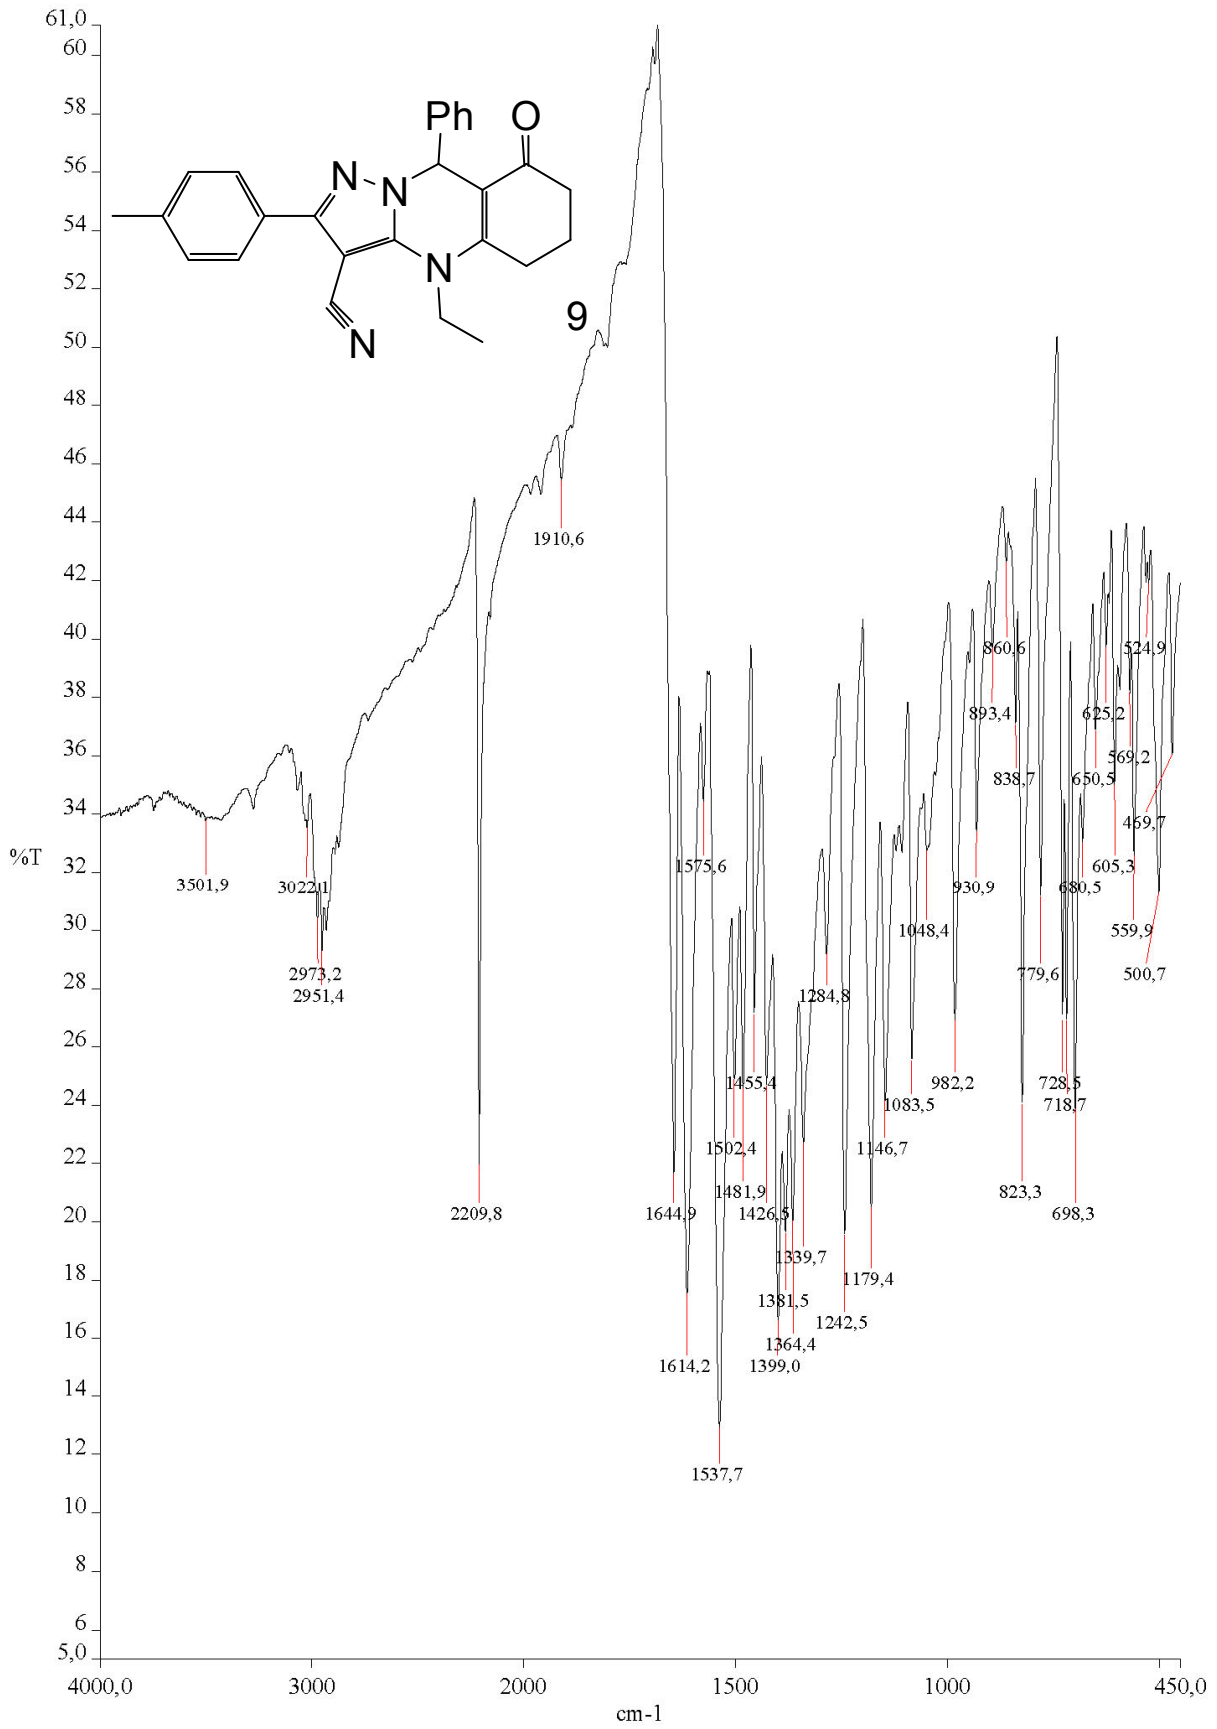

c:\pel\_data\spectra# 9450.sp - DAB-2-104-P1



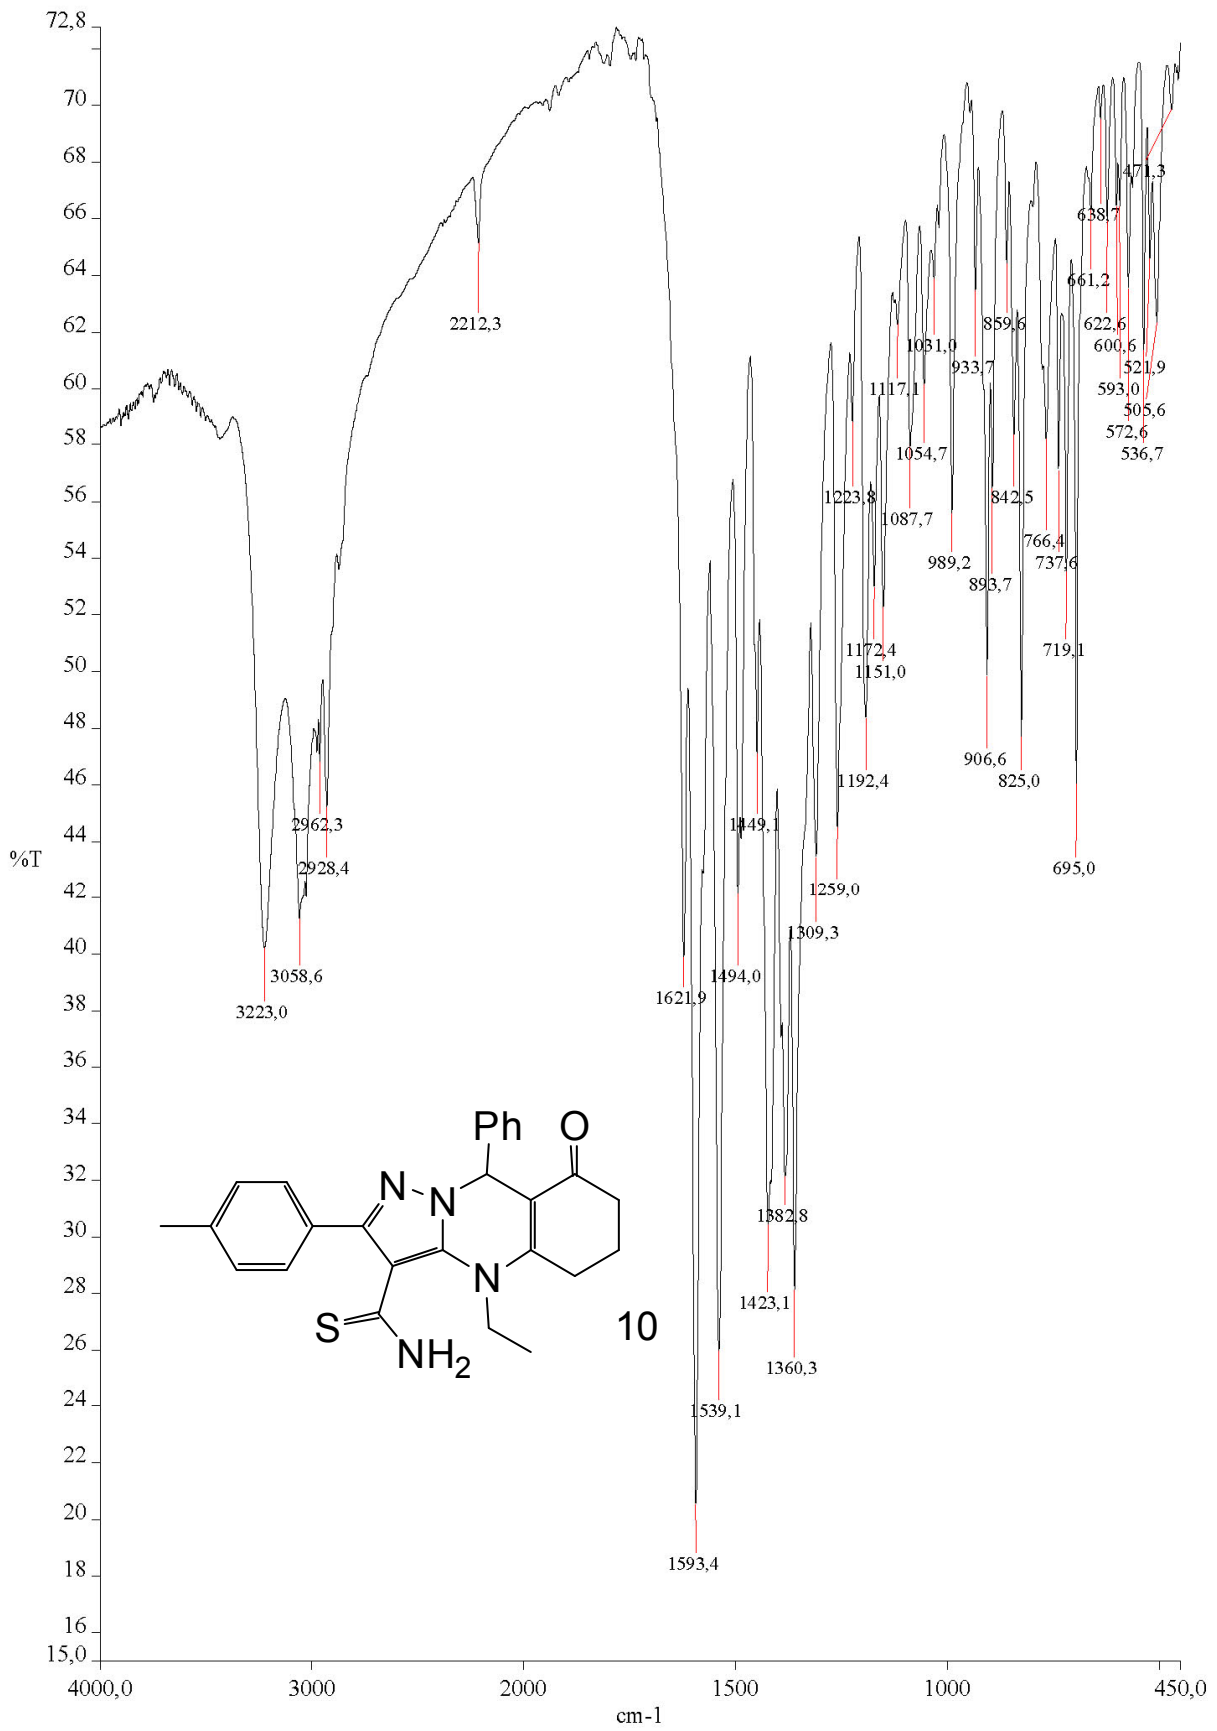

c:\pel\_data\spectra# 9451.sp - DAB-2-107-P2
